# Supplementary material for: Exogenous Jasmonic Acid Alleviates Blast Resistance Reduction Caused by LOX3 Knockout in Rice
Source: Biomolecules. 2023 Jul 31;13(8):1197. doi: 10.3390/biom13081197 (PMC10452216; doi:10.3390/biom13081197)
Supplement: Supplementary file 1 [file biomolecules-13-01197-s001.zip › biomolecules-2478080-supplementary.pdf]

## Article

# Exogenous Jasmonic Acid Alleviates Blast Resistance Reduction Caused by *LOX3* Knockout in Rice

Shunyu Su <sup>1,2,†</sup>, Ping Tang <sup>1,2,†</sup>, Rubin Zuo <sup>1,2</sup>, Hongfeng Chen <sup>1,2</sup>, Tianqi Zhao <sup>1,2</sup>, Shumin Yang <sup>1,2</sup> and Jing Yang <sup>1,2,\*</sup>

<sup>1</sup> State Key Laboratory for Conservation and Utilization of Bio-Resources in Yunnan, Yunnan Agricultural University, Kunming 650201, China; 2021210313@stu.ynau.edu.cn (S.S.); 2001015@ynau.edu.cn (P.T.); 2022210344@stu.ynau.edu.cn (R.Z.); 2020210289@stu.ynau.edu.cn (H.C.); 2021210323@stu.ynau.edu.cn (T.Z.); 2019311106@stu.ynau.edu.cn (S.Y.)

<sup>2</sup> Key Laboratory of Agro-Biodiversity and Pest Management of Ministry of Education, Yunnan Agricultural University, Kunming 650201, China

\* Correspondence: yangjing@ynau.edu.cn

† These authors contributed equally to this study.

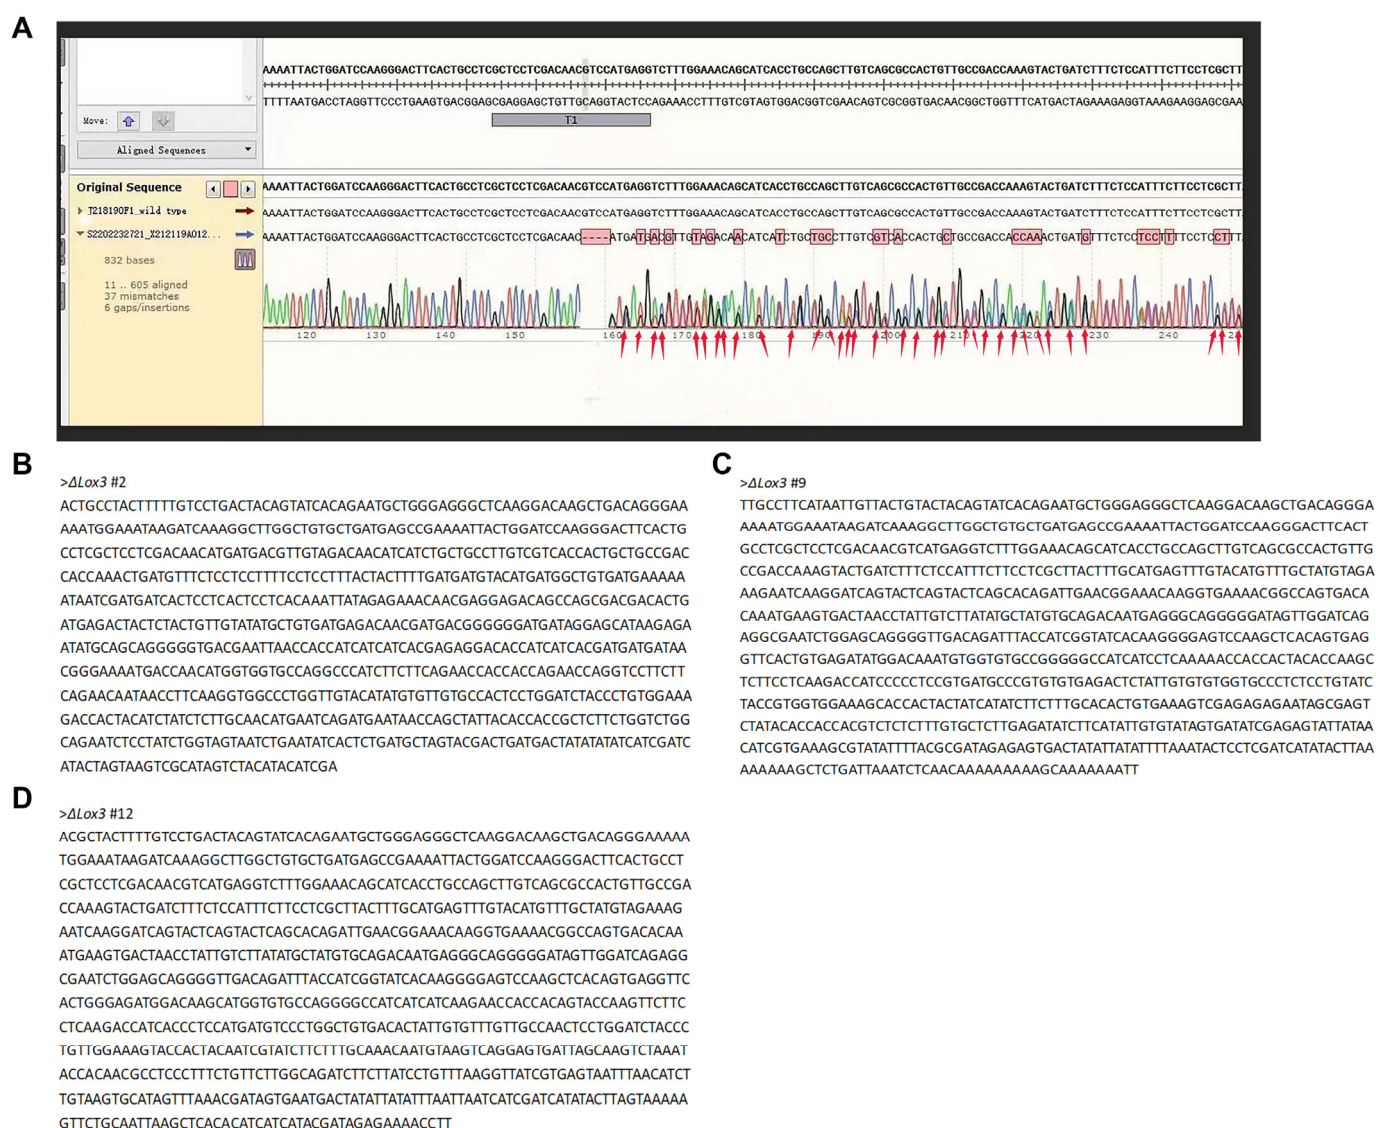

**Figure S1.** The mutant allele and sequences of *LOX3* knockout rice lines by the first-generation sequencing technique. (A) Sequencing result of *LOX3* knockout rice line #2. (B, C and D) The sequences from three *LOX3* knockout rice lines #2, #9 and #12. Red arrows: double peak.

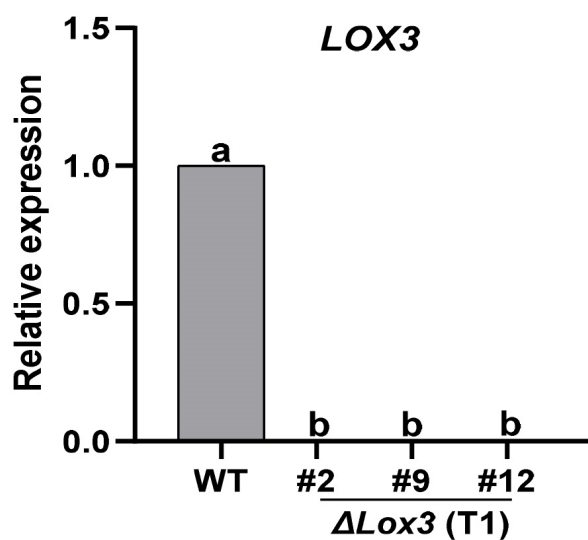

**Figure S2.** Expression of *LOX3* in T<sub>1</sub> generations of *LOX3* knockout transgenic rice lines and WT. The data are expressed as mean  $\pm$  standard deviation (SD). Different lowercase letters above the columns indicate significant differences ( $p < 0.05$ ).

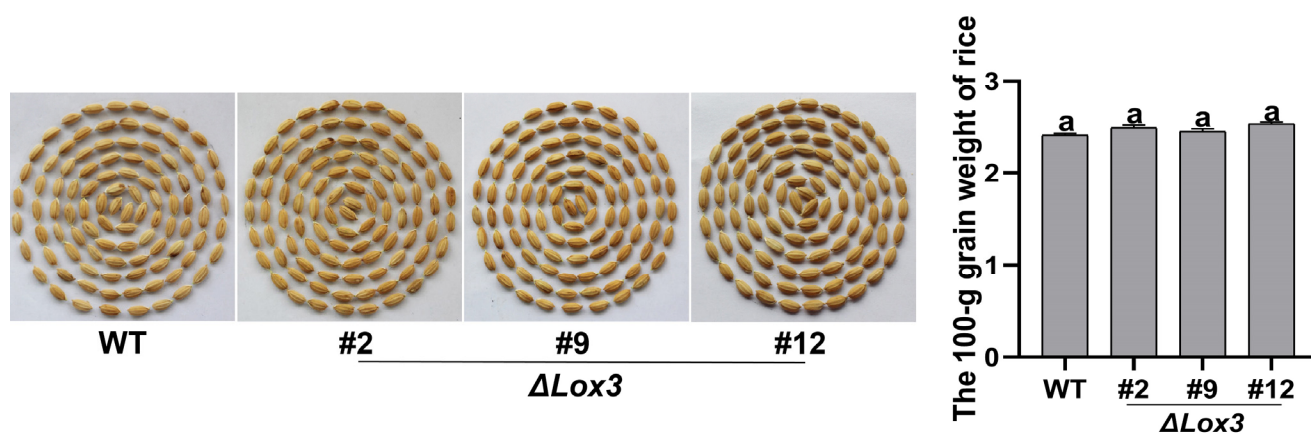

**Figure S3.** The 100-g grain weight of three  $\Delta Lox3$  transgenic rice lines and WT. The data are expressed as mean  $\pm$  standard deviation (SD). Different lowercase letters above the columns indicate significant differences ( $p < 0.05$ ).

**Table S1.** Primers used in this study.

| Gene name                        | Primer sequence (5'-3')                                  |
|----------------------------------|----------------------------------------------------------|
| Rice gene expression             |                                                          |
| <i>Ubiquitin</i>                 | F: CTGTCAACTGCCGCAAGAAG<br>R: GGCGAGTGACGCTCTAGTTC       |
| <i>OsbHLH35</i>                  | F: GTCATTTTTCGACACCCCA<br>R: CCTCGCAAGAAAACAACCACC       |
| <i>OsAOS2</i>                    | F: GGAGGAAGCTGCTGCAATAC<br>R: GGAGGTTGAAGCTTTGGTGA       |
| <i>OsWRKY45</i>                  | F: AATCATGGATGGACACGGGC<br>R: AGCTGAGACGACACATCAACA      |
| <i>OsPR1a</i>                    | F: TCGTATGCTATGCTA CGTGTTT<br>R: CACTA AGCAAATACGGCTGACA |
| <i>OsLOX3</i>                    | F: TCGCATTGGCTCGCACCCCT<br>R: TCGTCTTCTTCAGCCGCACGAT     |
| <i>OsRbohB</i>                   | F: AGCTGCACCCTTGCATCTTCTCTCT<br>R: ATCCGTAGGGCTTTGACATT  |
| <i>OsPOX1</i>                    | F: TATGCGTTTCACTTGCTT<br>R: CTCCTACACTTTGCGTTT           |
| <i>M. oryzae</i> gene expression |                                                          |
| <i>MoActin</i>                   | F: CCATGTACCCTGGTCTTTTCG<br>R: TTCGAGATCCACATCTGCTG      |
| <i>MoBAS4</i>                    | F: TGTGTCAGAACCTACCCCGA<br>R: CGCCAAGGTTAGGGCATTTC       |
| <i>MoCDIP1</i>                   | F: CCTTACTTTGGGCTCCGGTT<br>R: CGCACGTTGAAGTTGTCTGG       |
| Fungal relative growth           |                                                          |
| <i>q-gUBQ</i>                    | F: TTCTGGTCCTTCCACTTTCAG<br>R: ACGATTGATTAAACCAGTCCATGA  |
| <i>q-gPot2</i>                   | F: ACGACCCGTCTTTACTTATTTGG<br>R: AAGTAGCGTTGGTTTTGTTGGAT |

**Table S2.** Specific DEGs in #2\_vs\_WT, *M. oryzae* infected #2\_vs\_ *M. oryzae* infected WT, JA + *M. oryzae* infected #2\_vs\_JA + *M. oryzae* infected WT.

| Specific DEGs in B1_vs_A1 comparing B1_vs_A1, B2_vs_A2 and B3_vs_A3 |         |           |                                                                             |
|---------------------------------------------------------------------|---------|-----------|-----------------------------------------------------------------------------|
| Gene ID                                                             | Up/down | Gene name | Description                                                                 |
| gene-psbA                                                           | DOWN    | -         | -                                                                           |
| Os01g0130900                                                        | UP      | -         | Conserved hypothetical protein                                              |
| Os01g0155800                                                        | UP      | -         | Conserved hypothetical protein                                              |
| Os01g0162400                                                        | UP      | -         | Conserved hypothetical protein                                              |
| Os01g0176700                                                        | UP      | -         | Myb-like DNA-binding domain, SHAQKYF class domain containing protein        |
| Os01g0212400                                                        | UP      | OsEFCAX1  | EF-Hand type domain containing protein                                      |
| Os01g0224100                                                        | DOWN    | OsERF     | -                                                                           |
| Os01g0256500                                                        | UP      | -         | Similar to ZnI                                                              |
| Os01g0332150                                                        | DOWN    | -         | Hypothetical protein                                                        |
| Os01g0339500                                                        | DOWN    | ONAC030   | Similar to No apical meristem protein                                       |
| Os01g0392600                                                        | UP      | -         | Conserved hypothetical protein                                              |
| Os01g0537250                                                        | UP      | -         | Protein of unknown function DUF3778 domain containing protein               |
| Os01g0566701                                                        | UP      | OsHHLH117 | Non-protein coding transcript                                               |
| Os01g0580500                                                        | UP      | ACO7      | ACC oxidase, Ethylene biosynthesis                                          |
| Os01g0587400                                                        | UP      | -         | Serine/threonine protein kinase-related domain containing protein           |
| Os01g0606900                                                        | DOWN    | OsDjC10   | Heat shock protein DnaJ, N-terminal domain containing protein               |
| Os01g0692400                                                        | UP      | -         | Conserved hypothetical protein                                              |
| Os01g0701700                                                        | UP      | -         | SAM dependent carboxyl methyltransferase family protein                     |
| Os01g0707500                                                        | UP      | OsHHLH118 | Similar to Transcription factor LAX PANICLE                                 |
| Os01g0723100                                                        | UP      | -         | Senescence-associated family protein                                        |
| Os01g0740300                                                        | UP      | -         | Hypothetical protein                                                        |
| Os01g0740651                                                        | DOWN    | -         | Hypothetical protein                                                        |
| Os01g0756300                                                        | UP      | -         | Conserved hypothetical protein                                              |
| Os01g0806200                                                        | UP      | OsFbox045 | Cyclin-like F-box domain containing protein                                 |
| Os01g0823700                                                        | UP      | -         | Protein of unknown function DUF641, plant domain containing protein         |
| Os01g0826000                                                        | UP      | OsATX     | Heavy metal transport/detoxification protein domain containing protein      |
| Os01g0835500                                                        | DOWN    | rbohE     | Similar to Respiratory burst oxidase protein                                |
| Os01g0856500                                                        | UP      | OsLAX1    | Auxin transporter, Primary root and root hair elongation, Cd stress respons |

|              |      |           |                                                                                               |
|--------------|------|-----------|-----------------------------------------------------------------------------------------------|
| Os01g0866200 | UP   | -         | Similar to Histone H3                                                                         |
| Os01g0871100 | DOWN | -         | Alpha/beta hydrolase fold-1 domain containing protein                                         |
| Os01g0892800 | UP   | OsSTA40   | Similar to Ankyrin-kinase                                                                     |
| Os01g0910800 | UP   | -         | Conserved hypothetical protein                                                                |
| Os01g0956200 | UP   | -         | Glycosyltransferase AER61, uncharacterized domain containing protein                          |
| Os02g0100200 | DOWN | -         | Steroid nuclear receptor, ligand-binding domain containing protein                            |
| Os02g0129800 | UP   | -         | Conserved hypothetical protein                                                                |
| Os02g0490500 | UP   | -         | UDP-glucuronosyl/UDP-glucosyltransferase family protein                                       |
| Os02g0535901 | UP   | OsFbox092 | Cyclin-like F-box domain containing protein                                                   |
| Os02g0580900 | UP   | OsNRT1.3A | TGF-beta receptor, type I/II extracellular region family protein                              |
| Os02g0623400 | UP   | OsG1L3    | Similar to G1-like protein                                                                    |
| Os02g0671800 | UP   | -         | Integrase, catalytic core domain containing protein                                           |
| Os02g0673500 | UP   | -         | Basic helix-loop-helix dimerisation region bHLH domain containing protein                     |
| Os02g0684500 | UP   | -         | Similar to Histone H4                                                                         |
| Os02g0689900 | UP   | OsNRT1.5A | TGF-beta receptor, type I/II extracellular region family protein                              |
| Os02g0696900 | UP   | OsKANADI1 | Myb-like DNA-binding domain, SHAQKYF class domain containing protein                          |
| Os02g0702300 | UP   | -         | Conserved hypothetical protein                                                                |
| Os02g0716500 | UP   | OsFAD2    | Delta12-fatty acid desaturase                                                                 |
| Os02g0720500 | UP   | -         | Peptidase A1 domain containing protein                                                        |
| Os02g0755400 | UP   | -         | Similar to RNA recognition motif-containing protein SEB-4                                     |
| Os02g0772100 | UP   | -         | Conserved hypothetical protein                                                                |
| Os02g0787300 | UP   | SMG1      | Mitogen-activated protein kinase kinase 4, Defense response, Cell proliferation, Grain growth |
| Os02g0787600 | UP   | OsGLR1.2  | Glutamate receptor-related domain containing protein                                          |
| Os02g0814000 | DOWN | -         | Protein of unknown function DUF862, eukaryotic domain containing protein                      |
| Os03g0116400 | UP   | OsRhmbd7  | Similar to Membrane protein                                                                   |
| Os03g0149300 | UP   | -         | Protein of unknown function DUF6, transmembrane domain containing protein                     |
| Os03g0152000 | DOWN | -         | Heavy metal transport/detoxification protein domain containing protein                        |
| Os03g0170900 | UP   | OsSUT1    | Sucrose transporter                                                                           |
| Os03g0183200 | UP   | OsERF     | -                                                                                             |
| Os03g0195300 | UP   | OsSultr2  | Similar to Low affinity sulphate transporter 3                                                |
| Os03g0200200 | UP   | -         | Conserved hypothetical protein                                                                |
| Os03g0223301 | UP   | -         | Hypothetical gene                                                                             |

|              |          |           |                                                                                                                                                                     |
|--------------|----------|-----------|---------------------------------------------------------------------------------------------------------------------------------------------------------------------|
| Os03g0230300 | UP       | OsSRO1c   | Homologue of SRO (similar to RCD one), Regulation of stomatal closure, Abiotic stress respons                                                                       |
| Os03g0261800 | UP       | -         | Protein of unknown function DUF3049 domain containing protein                                                                                                       |
| Os03g0282232 | UP       | -         | Conserved hypothetical protein                                                                                                                                      |
| Os03g0299800 | UP       | -         | Protein of unknown function Cys-rich family protein                                                                                                                 |
| Os03g0304500 | UP       | -         | Tetratricopeptide-like helical domain containing protein                                                                                                            |
| Os03g0321300 | UP       | OsFbox137 | Cyclin-like F-box domain containing protein                                                                                                                         |
| Os03g0371000 | UP       | OsSTA101  | Similar to Cytochrome P450 family protein, expressed                                                                                                                |
| Os03g0375833 | UP       | -         | Non-protein coding transcript                                                                                                                                       |
| Os03g0389100 | UP       | OsMC8     | Peptidase C14, caspase catalytic domain containing protein                                                                                                          |
| Os03g0426350 | UP       | -         | Conserved hypothetical protein                                                                                                                                      |
| Os03g0561283 | UP       | -         | Conserved hypothetical protein                                                                                                                                      |
| Os03g0613100 | UP       | -         | Conserved hypothetical protein                                                                                                                                      |
| Os03g0624300 | UP       | -         | Conserved hypothetical protein                                                                                                                                      |
| Os03g0668500 | UP       | SIP31     | Conserved hypothetical protein                                                                                                                                      |
| Os03g0669300 | UP       | -         | Beta-1,3-glucanase-like protein                                                                                                                                     |
| Os03g0685300 | UP       | -         | Glutamine amidotransferase class-I domain containing protein                                                                                                        |
| Os03g0711150 | DOW<br>N | -         | Hypothetical protein                                                                                                                                                |
| Os03g0758000 | UP       | OsWRKY3   | Similar to WRKY23 transcription factor (Fragment)                                                                                                                   |
| Os03g0787300 | DOW<br>N | OsDjA5    | Similar to DnaJ homolog                                                                                                                                             |
| Os03g0799000 | UP       | -         | Similar to Histone H1                                                                                                                                               |
| Os03g0826900 | UP       | OsEnS-58  | Conserved hypothetical protein                                                                                                                                      |
| Os04g0128900 | UP       | YUCCA7    | Flavin monooxygenase-like enzyme, Auxin biosynthesi                                                                                                                 |
| Os04g0129900 | UP       | -         | Similar to OSIGBa0103I21.1 protein                                                                                                                                  |
| Os04g0200700 | UP       | -         | Hypothetical protein                                                                                                                                                |
| Os04g0249500 | UP       | SUS7      | Similar to H0211A12.6 protein                                                                                                                                       |
| Os04g0310400 | UP       | OsWAK36   | Similar to H0211A12.15 protein                                                                                                                                      |
| Os04g0389901 | DOW<br>N | -         | Hypothetical gene                                                                                                                                                   |
| Os04g0397800 | UP       | -         | Conserved hypothetical protein                                                                                                                                      |
| Os04g0398000 | UP       | OsERF101  | ERF transcription factor, A member of APETALA2/Ethylene-Responsive Element Binding Protein(AP2/EREBP) family, Regulation of drought stress response, Innate immunit |
| Os04g0429600 | UP       | OsCsIH3   | Putative cellulose synthase-like protein H3                                                                                                                         |
| Os04g0430600 | UP       | -         | Similar to OSIGBa0160I14.1 protein                                                                                                                                  |
| Os04g0431700 | UP       | Bph6      | Exocyst-localized protein, Resistance to planthoppers, (Nipponbare: BPH-susceptible                                                                                 |
| Os04g0475600 | UP       | -         | 2OG-Fe(II) oxygenase domain containing protein                                                                                                                      |
| Os04g0493600 | UP       | -         | Similar to Lectin-C precursor (PL-C)                                                                                                                                |

|              |          |             |                                                                         |
|--------------|----------|-------------|-------------------------------------------------------------------------|
| Os04g0498900 | UP       | -           | Similar to N-acetyltransferase ESCO1                                    |
| Os04g0514400 | DOW<br>N | -           | Peptidoglycan binding-like domain containing protein                    |
| Os04g0531900 | UP       | -           | Short-chain dehydrogenase/reductase SDR domain containing protein       |
| Os04g0580800 | UP       | OsRFP2-6    | Zinc finger, RING/FYVE/PHD-type domain containing protein               |
| Os04g0612301 | DOW<br>N | -           | Hypothetical protein                                                    |
| Os04g0684600 | UP       | -           | Similar to H0913C04.5 protein                                           |
| Os04g0688300 | UP       | prx61       | Haem peroxidase, plant/fungal/bacterial family protein                  |
| Os04g0689700 | UP       | -           | RNA recognition motif, RNP-1 domain containing protein                  |
| Os05g0114700 | UP       | -           | Myb-type HTH DNA-binding domain domain containing protein               |
| Os05g0142000 | UP       | -           | Conserved hypothetical protein                                          |
| Os05g0186900 | UP       | OsIAA16     | Similar to Auxin-responsive protein IAA16                               |
| Os05g0209500 | UP       | -           | Conserved hypothetical protein                                          |
| Os05g0269500 | UP       | -           | Generative cell specific-1, HAP2-GCS1 domain containing protein         |
| Os05g0277350 | DOW<br>N | -           | Similar to Leucine Rich Repeat family protein, expressed                |
| Os05g0361500 | UP       | OsPME17     | Similar to Pectinesterase                                               |
| Os05g0380900 | DOW<br>N | OsCML15     | Similar to Polcalcin Jun o 2 (Calcium-binding pollen allergen Jun o 2)  |
| Os05g0401500 | UP       | -           | Similar to oxidoreductase, 2OG-Fe oxygenase family protein              |
| Os05g0426000 | UP       | OsSWEET1b   | MtN3 and saliva related transmembrane protein family protein            |
| Os05g0447200 | UP       | OsLAX3      | Similar to auxin transporter-like protein 1                             |
| Os05g0461600 | UP       | -           | Similar to SIK1 protein (Nucleolar protein NOP56)                       |
| Os05g0465000 | UP       | -           | Conserved hypothetical protein                                          |
| Os05g0468800 | UP       | -           | Phosphatidylethanolamine-binding protein PEBP domain containing protein |
| Os05g0503650 | DOW<br>N | -           | Non-protein coding transcript                                           |
| Os05g0506000 | UP       | -           | Similar to MS5-like protein (Fragment)                                  |
| Os05g0590201 | DOW<br>N | -           | Hypothetical gene                                                       |
| Os06g0118700 | UP       | -           | Peptidase A1 domain containing protein                                  |
| Os06g0130900 | UP       | -           | Similar to Histone H3 (Fragment)                                        |
| Os06g0226700 | UP       | OsTCP19     | Similar to PCF1                                                         |
| Os06g0294000 | UP       | -           | Conserved hypothetical protein                                          |
| Os06g0317200 | UP       | -           | Similar to glycine-rich cell wall structural protein                    |
| Os06g0559600 | UP       | -           | Hypothetical conserved gene                                             |
| Os06g0604200 | UP       | OsPLDalpha4 | Chloroplast-localized phospholipase D, Herbivore defens                 |
| Os06g0667000 | UP       | -           | Serine/threonine protein kinase domain containing protein               |
| Os06g0672400 | UP       | OsG1L2      | Protein of unknown function DUF640 domain containing protein            |

|              |          |           |                                                                                                                      |
|--------------|----------|-----------|----------------------------------------------------------------------------------------------------------------------|
| Os07g0111400 | UP       | OsWRKY29  | WRKY transcription factor 29                                                                                         |
| Os07g0147550 | UP       | OsPsbR2   | Similar to Photosystem II 10 kDa polypeptide, chloroplast                                                            |
| Os07g0178800 | DOW<br>N | -         | Similar to Low molecular mass early light-inducible protein HV90, chloroplast precursor (ELIP)                       |
| Os07g0190800 | UP       | OsTRXh5   | Similar to Thioredoxin h                                                                                             |
| Os07g0442800 | UP       | -         | Conserved hypothetical protein                                                                                       |
| Os07g0480800 | UP       | OsXTH21   | Cellulase (EC 3.2.1.4)                                                                                               |
| Os07g0509800 | UP       | OsAPRL1   | Similar to adenosine 5'-phosphosulfate reductase 2                                                                   |
| Os07g0542400 | UP       | -         | Similar to Receptor protein kinase                                                                                   |
| Os07g0543100 | DOW<br>N | -         | Similar to Beta-amylase (EC 3.2.1.2)                                                                                 |
| Os07g0566500 | UP       | ONAC010   | Similar to NAC domain protein                                                                                        |
| Os07g0584100 | UP       | OsWNK5    | Similar to MAP kinase-like protein                                                                                   |
| Os07g0605200 | DOW<br>N | MADS18    | APETALA1 (AP1)/ FRUITFULL (FUL)-like MADS box transcription factor, Specification of inflorescence meristem identity |
| Os07g0624100 | DOW<br>N | -         | Similar to cDNA clone:J033024N05, full insert sequence                                                               |
| Os07g0631200 | DOW<br>N | -         | Zinc finger, RING/FYVE/PHD-type domain containing protein                                                            |
| Os07g0664600 | UP       | RMP8      | Glucose/ribitol dehydrogenase family protein                                                                         |
| Os08g0108100 | UP       | -         | Pectinesterase inhibitor domain containing protein                                                                   |
| Os08g0113000 | UP       | prx117    | Similar to Peroxidase 47 precursor (EC 1.11.1.7) (Atperox P47) (ATP32)                                               |
| Os08g0139700 | DOW<br>N | OsTPS29   | Similar to terpene synthase 6                                                                                        |
| Os08g0158600 | UP       | -         | Similar to Cell wall invertase (EC 3.2.1.26)                                                                         |
| Os08g0246800 | UP       | -         | Conserved hypothetical protein                                                                                       |
| Os08g0389601 | UP       | -         | Non-protein coding transcript                                                                                        |
| Os08g0403300 | UP       | -         | Heavy metal transport/detoxification protein domain containing protein                                               |
| Os08g0525000 | UP       | OsRab11G2 | Ras GTPase family protein                                                                                            |
| Os08g0540400 | UP       | OsCDPK21  | Similar to Calcium-dependent protein kinase                                                                          |
| Os08g0546800 | DOW<br>N | HSFB2B    | Similar to Heat stress transcription factor B-2b                                                                     |
| Os09g0109600 | UP       | OsDSSR1   | Small peptide, Drought tolerance                                                                                     |
| Os09g0330700 | UP       | -         | Ankyrin repeat domain containing protein                                                                             |
| Os09g0356800 | DOW<br>N | -         | Protein kinase, core domain containing protein                                                                       |
| Os09g0403000 | UP       | -         | Hypothetical conserved gene                                                                                          |
| Os09g0408550 | UP       | -         | Heavy metal-associated domain, HMA domain containing protein                                                         |
| Os09g0412400 | UP       | -         | Conserved hypothetical protein                                                                                       |
| Os09g0433600 | UP       | -         | Similar to Histone H4                                                                                                |
| Os09g0455300 | UP       | OsbHLH120 | Similar to INDEHISCENT protein                                                                                       |

|              |          |            |                                                                                                    |
|--------------|----------|------------|----------------------------------------------------------------------------------------------------|
| Os09g0457900 | DOW<br>N | ERF102     | AP2/ERF transcription factor, Regulation of the internode elongatio                                |
| Os09g0494600 | UP       | -          | Protein of unknown function DUF599 family protein                                                  |
| Os09g0559600 | UP       | -          | Thioredoxin domain 2 containing protein                                                            |
| Os10g0104000 | UP       | -          | Hypothetical conserved gene                                                                        |
| Os10g0109600 | UP       | poxA       | Peroxidase (EC 1.11.1.7)                                                                           |
| Os10g0154700 | UP       | OsCYP18-4  | Similar to Cyclophilin Dicyp-2                                                                     |
| Os10g0210500 | UP       | OsUMAMIT15 | Protein of unknown function DUF6, transmembrane domain containing protein                          |
| Os10g0409400 | UP       | RD22       | beta subunit of polygalacturonase 1, Abiotic stress respons                                        |
| Os10g0478000 | UP       | G1L5       | Transcriptional regulator, Regulator of meristem activity, Regulation of in-florescence developmen |
| Os10g0509401 | UP       | -          | Conserved hypothetical protein                                                                     |
| Os10g0516900 | UP       | -          | Conserved hypothetical protein                                                                     |
| Os10g0551200 | UP       | -          | Similar to Scl1 protein (Fragment)                                                                 |
| Os10g0567900 | UP       | -          | Similar to F-box protein interaction domain containing protein, expressed                          |
| Os10g0576600 | UP       | -          | Tetratricopeptide-like helical domain containing protein                                           |
| Os11g0133001 | UP       | -          | Similar to Ser/Thr protein kinase (Fragment)                                                       |
| Os11g0133100 | UP       | -          | Similar to D-mannose binding lectin family protein                                                 |
| Os11g0149200 | UP       | -          | Conserved hypothetical protein                                                                     |
| Os11g0170900 | UP       | OsBURP17   | Similar to BURP domain-containing protein 17                                                       |
| Os11g0177400 | UP       | OsABCG27   | Similar to ATPase, coupled to transmembrane movement of substances                                 |
| Os11g0213700 | UP       | -          | Leucine-rich repeat, typical subtype containing protein                                            |
| Os11g0222900 | UP       | -          | NB-ARC domain containing protein                                                                   |
| Os11g0226201 | DOW<br>N | -          | Similar to Protein kinase domain containing protein, expressed                                     |
| Os11g0246250 | UP       | -          | Non-protein coding transcript                                                                      |
| Os11g0289700 | UP       | -          | Cytochrome P450 family protein                                                                     |
| Os11g0417800 | UP       | -          | Non-protein coding transcript                                                                      |
| Os11g0470500 | UP       | -          | Similar to Protein kinase domain containing protein, expressed                                     |
| Os11g0471300 | DOW<br>N | -          | Similar to OSIGBa0145N07.3 protein                                                                 |
| Os11g0543100 | UP       | -          | Conserved hypothetical protein                                                                     |
| Os11g0677101 | UP       | -          | Similar to NB-ARC domain containing protein                                                        |
| Os11g0685500 | DOW<br>N | -          | Hypothetical protein                                                                               |
| Os11g0701500 | UP       | -          | Similar to Class III chitinase homologue                                                           |
| Os12g0199000 | UP       | -          | Similar to Jasmonate-induced protein                                                               |
| Os12g0210500 | UP       | -          | Conserved hypothetical protein                                                                     |
| Os12g0476200 | UP       | SWEET13    | Sucrose transporter, TAL effector PthXo2-dependent disease susceptibility to bacterial pathoge     |

| Os12g0516000                                                               | UP      | -          | Conserved hypothetical protein                                            |
|----------------------------------------------------------------------------|---------|------------|---------------------------------------------------------------------------|
| Os12g0552400                                                               | UP      | -          | Rossmann-like alpha/beta/alpha sandwich fold domain containing protein    |
| Os12g0554100                                                               | UP      | OsTBL34    | Conserved hypothetical protein                                            |
| Os12g0567300                                                               | UP      | R2R3-MYB   | Myb transcription factor domain containing protein                        |
| Os12g0569700                                                               | DOWN    | OsHsp23.7  | Similar to Heat shock protein 70                                          |
| Os12g0595800                                                               | UP      | -          | Similar to cDNA clone:J023098M23, full insert sequence                    |
| Os12g0630200                                                               | UP      | -          | Thaumatococcus, pathogenesis-related family protein                       |
| <b>Specific DEGs in B2_vs_A2 comparing B2_vs_A2, B1_vs_A1 and B3_vs_A3</b> |         |            |                                                                           |
| Gene ID                                                                    | up/down | Gene name  | Description                                                               |
| Os01g0106400                                                               | UP      | -          | Similar to Isoflavone reductase homolog IRL (EC 1.3.1.-)                  |
| Os01g0111800                                                               | UP      | -          | Conserved hypothetical protein                                            |
| Os01g0111900                                                               | UP      | SIP34      | Glutelin family protein                                                   |
| Os01g0117200                                                               | DOWN    | OsRLCK16   | Similar to ARK protein (Fragment)                                         |
| Os01g0140400                                                               | UP      | PLRRP      | Similar to leucine-rich repeat protein-related                            |
| Os01g0174100                                                               | DOWN    | -          | Conserved hypothetical protein                                            |
| Os01g0194000                                                               | UP      | -          | Conserved hypothetical protein                                            |
| Os01g0195400                                                               | UP      | -          | Harpin-induced 1 domain containing protein                                |
| Os01g0210400                                                               | UP      | -          | Protein of unknown function DUF616 domain containing protein              |
| Os01g0214600                                                               | UP      | OsGELP2    | Lipase, GDSL domain containing protein                                    |
| Os01g0248701                                                               | UP      | -          | Terpenoid synthase domain containing protein                              |
| Os01g0249200                                                               | UP      | OsGLP1-1   | Similar to Nectarin 1 precursor (EC 1.15.1.1) (Superoxide dismutase [Mn]) |
| Os01g0281600                                                               | UP      | OsENODL4   | Cupredoxin domain containing protein                                      |
| Os01g0329900                                                               | UP      | OsGELP14   | Similar to Lipase homolog (Fragment)                                      |
| Os01g0330100                                                               | UP      | OsGELP15   | Similar to Alpha-L-fucosidase 2                                           |
| Os01g0343300                                                               | UP      | OsGATA8    | Zinc finger, NHR/GATA-type domain containing protein                      |
| Os01g0508000                                                               | UP      | Os1bglu1   | Similar to Beta-glucosidase                                               |
| Os01g0508100                                                               | UP      | RH3        | Ferritin/ribonucleotide reductase-like family protein                     |
| Os01g0508500                                                               | UP      | RH2        | Conserved hypothetical protein                                            |
| Os01g0511800                                                               | UP      | -          | Conserved hypothetical protein                                            |
| Os01g0525700                                                               | UP      | -          | Similar to DVL4/RTFL17 (ROTUNDIFOLIA LIKE 17)                             |
| Os01g0545100                                                               | UP      | OsMYB86-L1 | Conserved hypothetical protein                                            |
| Os01g0555200                                                               | DOWN    | -          | Asp/Glu racemase family protein                                           |
| Os01g0601200                                                               | UP      | OsRLCK41   | Similar to Protein kinase family protein                                  |
| Os01g0603300                                                               | UP      | -          | Similar to MCB2 protein                                                   |
| Os01g0609900                                                               | UP      | OsPDR8     | Similar to Pleiotropic drug resistance protein 4                          |

|              |      |           |                                                                                                                                                                  |
|--------------|------|-----------|------------------------------------------------------------------------------------------------------------------------------------------------------------------|
| Os01g0618900 | UP   | OsPGL31   | Similar to Polygalacturonase                                                                                                                                     |
| Os01g0619800 | DOWN | -         | Similar to Hydrolase, hydrolyzing O-glycosyl compounds                                                                                                           |
| Os01g0619900 | DOWN | OsTCL2    | Similar to DNA binding                                                                                                                                           |
| Os01g0625200 | UP   | -         | Similar to kinesin motor family protein                                                                                                                          |
| Os01g0652800 | UP   | OsTBL57   | Protein of unknown function DUF231, plant domain containing protein                                                                                              |
| Os01g0656400 | UP   | OsWRKY15  | Similar to WRKY transcription factor 15                                                                                                                          |
| Os01g0659900 | UP   | OsFBK1    | Kelch-domain-containing F-box protein, Component of an SCF E3 ligase, Regulation of anther and root secondary cell wall thickenings, Regulation of lignification |
| Os01g0660300 | UP   | -         | Similar to Pyruvate kinase                                                                                                                                       |
| Os01g0670500 | UP   | -         | Conserved hypothetical protein                                                                                                                                   |
| Os01g0681700 | DOWN | -         | Hypothetical conserved gene                                                                                                                                      |
| Os01g0690600 | UP   | -         | Conserved hypothetical protein                                                                                                                                   |
| Os01g0695800 | UP   | MDR4      | Similar to MDR-like ABC transporter                                                                                                                              |
| Os01g0697100 | UP   | -         | UDP-glucuronosyl/UDP-glucosyltransferase family protein                                                                                                          |
| Os01g0702700 | UP   | OsMYB14   | Similar to Transcription factor MYB86 (Myb-related protein 86) (AtMYB86) (Myb homolog 4) (AtMyb4)                                                                |
| Os01g0714800 | UP   | OsWRKY26  | WRKY transcription factor 26                                                                                                                                     |
| Os01g0716200 | UP   | -         | IQ calmodulin-binding region domain containing protein                                                                                                           |
| Os01g0717000 | UP   | -         | Similar to GmCK1p (EC 2.7.1.32)                                                                                                                                  |
| Os01g0723600 | UP   | -         | Ribose-phosphate pyrophosphokinase 3 (EC 2.7.6.1) (Phosphoribosyl pyrophosphate synthetase 3)                                                                    |
| Os01g0738300 | UP   | -         | Protein kinase, core domain containing protein                                                                                                                   |
| Os01g0744000 | UP   | -         | Similar to Kinesin heavy chain (Fragment)                                                                                                                        |
| Os01g0750000 | UP   | OsRab11D2 | Similar to ras-related protein RIC2                                                                                                                              |
| Os01g0787000 | UP   | PRX19     | Similar to Peroxidase (EC 1.11.1.7)                                                                                                                              |
| Os01g0796000 | UP   | -         | Conserved hypothetical protein                                                                                                                                   |
| Os01g0805900 | UP   | OsTUB4    | Tubulin beta-2 chain (Beta-2 tubulin)                                                                                                                            |
| Os01g0813700 | UP   | Os1bglu2  | Similar to Non-cyanogenic beta-glucosidase                                                                                                                       |
| Os01g0816100 | UP   | OsNAC4    | Similar to NAC domain protein                                                                                                                                    |
| Os01g0831250 | UP   | -         | Hypothetical gene                                                                                                                                                |
| Os01g0834900 | UP   | -         | Hypothetical conserved gene                                                                                                                                      |
| Os01g0842500 | UP   | OsLAC5    | Similar to Laccase (EC 1.10.3.2)                                                                                                                                 |
| Os01g0863300 | UP   | -         | Similar to MCB2 protein                                                                                                                                          |
| Os01g0868900 | UP   | OsSub11   | Peptidase S8, subtilisin-related domain containing protein                                                                                                       |
| Os01g0872566 | UP   | -         | Hypothetical protein                                                                                                                                             |
| Os01g0878900 | UP   | -         | Similar to 4,5-DOPA dioxygenase extradiol-like protein                                                                                                           |
| Os01g0879200 | UP   | DRR206    | Plant disease resistance response protein domain containing protein                                                                                              |

|              |      |              |                                                                      |
|--------------|------|--------------|----------------------------------------------------------------------|
| Os01g0882800 | UP   | OsAAP11<br>E | Similar to Amino acid carrier (Fragment)                             |
| Os01g0883800 | DOWN | 20ox2        | Similar to GA C20oxidase2                                            |
| Os01g0896200 | UP   | -            | Similar to SF16 protein                                              |
| Os01g0897700 | UP   | OsFH1        | Similar to FH protein NFH1                                           |
| Os01g0908600 | UP   | OsProT1      | Amino acid transporter, transmembrane domain containing protein      |
| Os01g0914400 | UP   | STOMAG<br>EN | Similar to EPIDERMAL PATTERNING FACTOR-like protein 9                |
| Os01g0926600 | UP   | OsGT47A      | Similar to Pectin-glucuronyltransferase                              |
| Os01g0926700 | UP   | OsIRX10      | Similar to secondary cell wall-related glycosyltransferase family 47 |
| Os01g0942300 | UP   | OsEGL2       | Similar to Beta glucanase precursor (EC 3.2.1.73) (Fragment)         |
| Os01g0951100 | UP   | -            | Arf GTPase activating protein family protein                         |
| Os01g0952000 | UP   | GER8         | Similar to Germin-like protein 1-3                                   |
| Os01g0971400 | UP   | -            | Similar to Cysteine proteinase                                       |
| Os02g0125400 | UP   | OsCYCP4      | Negative regulatory factor PREG domain containing protein            |
| Os02g0151300 | UP   | OsGH9B7      | Similar to Cellulase (Fragment)                                      |
| Os02g0199600 | DOWN | -            | Similar to F-box domain containing protein                           |
| Os02g0275200 | UP   | -            | Xyloglucan fucosyltransferase family protein                         |
| Os02g0303500 | UP   | -            | Eggshell protein family protein                                      |
| Os02g0322400 | UP   | -            | Similar to NPKL2 (Fragment)                                          |
| Os02g0327500 | UP   | -            | Protein of unknown function DUF266, plant family protein             |
| Os02g0329800 | UP   | XAX1         | Glycosyltransferase, Xylan biosynthesi                               |
| Os02g0465600 | UP   | -            | Kelch-type beta propeller domain containing protein                  |
| Os02g0526000 | UP   | -            | Similar to H0502B11.6 protein                                        |
| Os02g0538700 | UP   | -            | Harpin-induced 1 domain containing protein                           |
| Os02g0549200 | UP   | OsRLCK7<br>3 | Similar to Ser Thr specific protein kinase-like protein              |
| Os02g0549401 | UP   | -            | Hypothetical gene                                                    |
| Os02g0569400 | UP   | CYP76M8      | Cytochrome P450 family protein                                       |
| Os02g0589900 | UP   | -            | Hypothetical conserved gene                                          |
| Os02g0597300 | UP   | -            | Leucine-rich repeat domain containing protein                        |
| Os02g0602900 | DOWN | -            | Conserved hypothetical protein                                       |
| Os02g0618400 | UP   | OsMPS        | R2R3-type MYB transcription factor, Adaptive growth regulatio        |
| Os02g0620400 | UP   | -            | RmlC-like jelly roll fold domain containing protein                  |
| Os02g0625300 | UP   | OsPPCK2      | Similar to PEPC kinase                                               |
| Os02g0626400 | UP   | OsPAL        | Phenylalanine ammonia-lyase (EC 4.3.1.5)                             |
| Os02g0627100 | UP   | OsPAL1       | Similar to Phenylalanine ammonia-lyase (EC 4.3.1.5)                  |
| Os02g0632800 | UP   | WAK14        | Wall-associated kinase, Positive regulation of rice blast resistanc  |
| Os02g0638650 | UP   | OsERF        | -                                                                    |
| Os02g0639300 | UP   | OsCBSX11     | Conserved hypothetical protein                                       |
| Os02g0640300 | UP   | -            | Similar to Membrane steroid binding protein 1 (AtMP1)                |

|              |      |            |                                                                                                                                        |
|--------------|------|------------|----------------------------------------------------------------------------------------------------------------------------------------|
| Os02g0654300 | UP   | -          | Similar to Protein kinase KIPK                                                                                                         |
| Os02g0655800 | UP   | -          | Serine/threonine protein kinase domain containing protein                                                                              |
| Os02g0657000 | UP   | OsERF      | -                                                                                                                                      |
| Os02g0668500 | DOWN | -          | Cellular retinaldehyde-binding/triple function, C-terminal domain containing protein                                                   |
| Os02g0675700 | UP   | -          | Protein of unknown function DUF248, methyltransferase putative family protein                                                          |
| Os02g0676800 | UP   | OsERF      | -                                                                                                                                      |
| Os02g0677300 | UP   | OsDREB1G   | Similar to CRT/DRE binding factor 1                                                                                                    |
| Os02g0684400 | DOWN | -          | Similar to OXS                                                                                                                         |
| Os02g0712700 | UP   | -          | Concanavalin A-like lectin/glucanase domain containing protein                                                                         |
| Os02g0715300 | UP   | -          | Conserved hypothetical protein                                                                                                         |
| Os02g0718100 | UP   | OsAGP22    | Non-protein coding transcript                                                                                                          |
| Os02g0718600 | UP   | OsAGP21    | Conserved hypothetical protein                                                                                                         |
| Os02g0719600 | UP   | JMT-2      | SAM dependent carboxyl methyltransferase family protein                                                                                |
| Os02g0720600 | UP   | -          | Peptidase A1 domain containing protein                                                                                                 |
| Os02g0738200 | UP   | OsPUB40    | Zinc finger, RING/FYVE/PHD-type domain containing protein                                                                              |
| Os02g0738300 | UP   | -          | Conserved hypothetical protein                                                                                                         |
| Os02g0755000 | UP   | OsTSD2     | Putative methyltransferase, Pectin synthesis and methylesterification, Root development, Cellular adhesion                             |
| Os02g0768400 | UP   | -          | Hypothetical gene                                                                                                                      |
| Os02g0771400 | UP   | OsPFA-DSP2 | Protein-tyrosine phosphatase, SIW14-like domain containing protein                                                                     |
| Os02g0771700 | UP   | Gns9       | Glycoside hydrolase, family 17 protein                                                                                                 |
| Os02g0775600 | UP   | -          | Zinc finger, C2H2-like domain containing protein                                                                                       |
| Os02g0781400 | UP   | -          | Similar to 20 kDa chaperonin, chloroplast precursor (Protein Cpn21) (Chloroplast protein Cpn10) (Chloroplast chaperonin 10) (Ch-CPN10) |
| Os02g0803300 | UP   | -          | Epsin-like, N-terminal domain containing protein                                                                                       |
| Os02g0829000 | UP   | -          | Hypothetical gene                                                                                                                      |
| Os03g0113000 | UP   | OsRLCK95   | Serine/threonine protein kinase domain containing protein                                                                              |
| Os03g0116300 | UP   | -          | Similar to catalytic/ hydrolase                                                                                                        |
| Os03g0118800 | UP   | -          | Similar to Hydroxymethylglutaryl-CoA synthase                                                                                          |
| Os03g0123800 | UP   | -          | Similar to Hydrolase                                                                                                                   |
| Os03g0126300 | UP   | -          | Similar to cDNA clone:001-042-G03, full insert sequence                                                                                |
| Os03g0130100 | UP   | -          | Similar to Acyl-activating enzyme 11                                                                                                   |
| Os03g0160600 | DOWN | -          | Similar to type I inositol-1,4,5-trisphosphate 5-phosphatase CVP2                                                                      |
| Os03g0162900 | UP   | -          | Pentatricopeptide repeat domain containing protein                                                                                     |
| Os03g0183500 | UP   | -          | Protein of unknown function DUF581 family protein                                                                                      |

|              |      |            |                                                                                                       |
|--------------|------|------------|-------------------------------------------------------------------------------------------------------|
| Os03g0203700 | UP   | osACA1     | Similar to Calcium-transporting ATPase 2, plasma membrane-type (EC 3.6.3.8) (Ca(2+)-ATPase isoform 2) |
| Os03g0232800 | UP   | -          | Similar to Lecithin:cholesterol acyltransferase family protein, expressed                             |
| Os03g0234900 | UP   | PRX39      | Similar to Peroxidase (EC 1.11.1.7)                                                                   |
| Os03g0246500 | UP   | -          | Protein of unknown function DUF869, plant family protein                                              |
| Os03g0258200 | UP   | -          | Alpha/beta hydrolase fold-3 domain containing protein                                                 |
| Os03g0262700 | UP   | -          | Harpin-induced 1 domain containing protein                                                            |
| Os03g0264400 | UP   | OASA2      | Anthranilate synthase alpha 2 subunit                                                                 |
| Os03g0272650 | DOWN | -          | Non-protein coding transcript                                                                         |
| Os03g0280400 | DOWN | -          | Similar to plant-specific domain TIGR01589 family protein                                             |
| Os03g0285200 | UP   | -          | Conserved hypothetical protein                                                                        |
| Os03g0285300 | UP   | -          | Conserved hypothetical protein                                                                        |
| Os03g0289800 | UP   | -          | Similar to Leucoanthocyanidin dioxygenase-like protein                                                |
| Os03g0300900 | UP   | -          | Glycosyl transferase, family 8 protein                                                                |
| Os03g0301800 | UP   | -          | Similar to Kinesin-like polypeptides 9 (Fragment)                                                     |
| Os03g0304800 | UP   | -          | Lg106-like family protein                                                                             |
| Os03g0305400 | UP   | -          | UspA domain containing protein                                                                        |
| Os03g0316200 | UP   | OsGolS1    | Similar to Galactinol synthase (Fragment)                                                             |
| Os03g0323600 | DOWN | OsDjC29    | Similar to DnaJ domain containing protein, expressed                                                  |
| Os03g0341600 | DOWN | -          | Pollen Ole e 1 allergen/extensin domain containing protein                                            |
| Os03g0342100 | DOWN | -          | Pollen Ole e 1 allergen/extensin domain containing protein                                            |
| Os03g0344400 | UP   | -          | Hypothetical conserved gene                                                                           |
| Os03g0368900 | UP   | PRX45      | Haem peroxidase family protein                                                                        |
| Os03g0386500 | UP   | OsTPP9     | Similar to Trehalose-6-phosphate phosphatase                                                          |
| Os03g0389700 | UP   | OsDAHPS1   | 3-Deoxy-D-arabino-heptulosonate 7-phosphate synthase, Chorismate biosynthesis                         |
| Os03g0402800 | UP   | OsJAZ5     | Tify domain containing protein                                                                        |
| Os03g0404800 | UP   | -          | NAD(P)-binding domain containing protein                                                              |
| Os03g0405500 | UP   | -          | Similar to PDI-like protein                                                                           |
| Os03g0412300 | UP   | -          | Heavy metal transport/detoxification protein domain containing protein                                |
| Os03g0413100 | UP   | OsACR7     | Similar to ACR4                                                                                       |
| Os03g0416200 | UP   | BC1        | BRITTLE CULM1                                                                                         |
| Os03g0431600 | DOWN | -          | Hypothetical conserved gene                                                                           |
| Os03g0567100 | UP   | -          | Conserved hypothetical protein                                                                        |
| Os03g0620400 | DOWN | -          | Hypothetical conserved gene                                                                           |
| Os03g0629800 | UP   | -          | Conserved hypothetical protein                                                                        |
| Os03g0646100 | UP   | FtsZ2-1    | Similar to Plastid division protein ftsZ1 precursor                                                   |
| Os03g0658800 | UP   | Os-CYP87C2 | Cytochrome P450 family protein                                                                        |
| Os03g0703100 | UP   | Os3bglu8   | Similar to Beta-glucosidase                                                                           |

|              |      |           |                                                                                                   |
|--------------|------|-----------|---------------------------------------------------------------------------------------------------|
| Os03g0713600 | UP   | -         | Aldo/keto reductase domain containing protein                                                     |
| Os03g0722500 | UP   | -         | Glycoside hydrolase, family 17 protein                                                            |
| Os03g0730500 | UP   | OsSCP20   | Peptidase S10, serine carboxypeptidase family protein                                             |
| Os03g0739500 | UP   | -         | Conserved hypothetical protein                                                                    |
| Os03g0740833 | UP   | -         | Conserved hypothetical protein                                                                    |
| Os03g0751600 | UP   | -         | Similar to Circumsporozoite protein                                                               |
| Os03g0757900 | UP   | -         | Similar to UDP-glucose 6-dehydrogenase (EC 1.1.1.22) (UDP-Glc dehydrogenase) (UDP-GlcDH) (UDPGDH) |
| Os03g0761000 | UP   | -         | SWIB/MDM2 domain containing protein                                                               |
| Os03g0788200 | UP   | -         | MD-2-related lipid-recognition domain containing protein                                          |
| Os03g0790500 | UP   | GID1      | Alpha/beta hydrolase fold-3 domain containing protein                                             |
| Os03g0793800 | UP   | OsLTPG7   | Plant lipid transfer protein and hydrophobic protein, helical domain containing protein           |
| Os03g0802500 | UP   | -         | ATPase, AAA-type, core domain containing protein                                                  |
| Os03g0806800 | UP   | -         | Conserved hypothetical protein                                                                    |
| Os03g0815200 | UP   | -         | Similar to Methylenetetrahydrofolate reductase (EC 1.5.1.20)                                      |
| Os03g0817800 | UP   | OsTBL6    | Protein of unknown function DUF231 domain containing protein                                      |
| Os03g0831700 | UP   | -         | Conserved hypothetical protein                                                                    |
| Os03g0837100 | UP   | OsCesA5   | Similar to Cellulose synthase-6                                                                   |
| Os03g0852400 | UP   | OsAGP31   | Conserved hypothetical protein                                                                    |
| Os03g0859900 | UP   | -         | Protein of unknown function DUF547 domain containing protein                                      |
| Os04g0103700 | DOWN | -         | Serine/threonine protein kinase-related domain containing protein                                 |
| Os04g0116600 | UP   | -         | Glucose/ribitol dehydrogenase family protein                                                      |
| Os04g0142400 | UP   | -         | Conserved hypothetical protein                                                                    |
| Os04g0154800 | UP   | -         | Protein of unknown function DUF594 family protein                                                 |
| Os04g0168300 | UP   | -         | Conserved hypothetical protein                                                                    |
| Os04g0203450 | UP   | -         | Hypothetical protein                                                                              |
| Os04g0243700 | UP   | OsCTR1    | Zinc finger, RING/FYVE/PHD-type domain containing protein                                         |
| Os04g0271450 | DOWN | -         | Non-protein coding transcript                                                                     |
| Os04g0282400 | DOWN | -         | Similar to FPF1 protein-like (RAA1)                                                               |
| Os04g0344100 | UP   | -         | Similar to OSIGBa0106G08.3 protein                                                                |
| Os04g0383700 | UP   | OsRALF-16 | Conserved hypothetical protein                                                                    |
| Os04g0387000 | DOWN | -         | Hypothetical conserved gene                                                                       |
| Os04g0396500 | UP   | LAX2      | Regulation of axillary meristem formation                                                         |
| Os04g0399300 | DOWN | -         | Similar to Nudix hydrolase 13, mitochondrial precursor (EC 3.6.1.-) (AtNUDT13)                    |
| Os04g0401000 | UP   | PI21      | Proline-rich protein, Blast resistance                                                            |
| Os04g0401100 | UP   | -         | Similar to OSIGBa0113L04.8 protein                                                                |
| Os04g0406600 | UP   | -         | Prephenate dehydratase domain containing protein                                                  |
| Os04g0412900 | UP   | -         | Zinc finger, Sec23/Sec24-type domain containing protein                                           |

|              |      |           |                                                                                                    |
|--------------|------|-----------|----------------------------------------------------------------------------------------------------|
| Os04g0416700 | UP   | -         | Harpin-induced 1 domain containing protein                                                         |
| Os04g0439600 | UP   | OsCRR1    | Regulator of chromosome condensation/beta-lactamase-inhibitor protein II domain containing protein |
| Os04g0447100 | UP   | SPH       | Similar to Lipxygenase                                                                             |
| Os04g0482300 | UP   | -         | Kelch related domain containing protein                                                            |
| Os04g0497000 | UP   | Os-NADPH1 | Similar to Allyl alcohol dehydrogenase                                                             |
| Os04g0499200 | UP   | -         | Enhancer of rudimentary family protein                                                             |
| Os04g0514800 | UP   | -         | Similar to Dual specificity kinase 1                                                               |
| Os04g0538400 | UP   | -         | Similar to Nodulin 21 (N-21)                                                                       |
| Os04g0550200 | UP   | OsERF     | -                                                                                                  |
| Os04g0554200 | UP   | -         | Similar to OSIGBa0143N19.13 protein                                                                |
| Os04g0567800 | UP   | OsDof18   | Similar to OSIGBa0103M18.3 protein                                                                 |
| Os04g0569900 | UP   | -         | IQ calmodulin-binding region domain containing protein                                             |
| Os04g0577800 | UP   | -         | Uncharacterised protein family UPF0136, Transmembrane domain containing protein                    |
| Os04g0578600 | DOWN | OsFRO2    | Similar to H0404F02.15 protein                                                                     |
| Os04g0583200 | DOWN | -         | Conserved hypothetical protein                                                                     |
| Os04g0589400 | UP   | -         | Conserved hypothetical protein                                                                     |
| Os04g0593400 | UP   | -         | Similar to OSIGBa0142I02-OSIGBa0101B20.20 protein                                                  |
| Os04g0597600 | UP   | OsPTR5    | TGF-beta receptor, type I/II extracellular region family protein                                   |
| Os04g0600900 | UP   | GRF3      | Similar to B0403H10-OSIGBa0105A11.9 protein                                                        |
| Os04g0606000 | UP   | -         | Transferase family protein                                                                         |
| Os04g0634800 | DOWN | -         | Similar to H0315F07.8 protein                                                                      |
| Os04g0640700 | UP   | -         | Similar to Alpha-L-arabinofuranosidase/beta-D-xylosidase isoenzyme ARA-I                           |
| Os04g0654500 | UP   | -         | Conserved hypothetical protein                                                                     |
| Os04g0671200 | UP   | PAO4      | Polyamine oxidase, Seed germinatio                                                                 |
| Os04g0677700 | UP   | OsKTN80b  | Katanin P80 ortholog, Katanin regulatory subunit P80                                               |
| Os04g0685900 | UP   | OsRLCK174 | Similar to Receptor-like protein kinase-like protein (Fragment)                                    |
| Os04g0689500 | UP   | -         | Similar to H0814G11.12 protein                                                                     |
| Os04g0690100 | UP   | -         | Zinc finger, C2H2-type domain containing protein                                                   |
| Os05g0103000 | UP   | OsbHLH083 | Similar to MYC1                                                                                    |
| Os05g0114000 | UP   | -         | Similar to PRLI-interacting factor F (Fragment)                                                    |
| Os05g0119850 | UP   | -         | Hypothetical protein                                                                               |
| Os05g0130300 | UP   | -         | Conserved hypothetical protein                                                                     |
| Os05g0130600 | UP   | -         | Conserved hypothetical protein                                                                     |
| Os05g0159300 | UP   | OsGELP62  | Similar to Alpha-L-fucosidase 2                                                                    |
| Os05g0163300 | UP   | OsFLA9    | Similar to Arabinogalactan protein-like                                                            |

|              |      |           |                                                                                                                               |
|--------------|------|-----------|-------------------------------------------------------------------------------------------------------------------------------|
| Os05g0176100 | UP   | OsCesA1   | Similar to Cellulose synthase BoCesA1                                                                                         |
| Os05g0189300 | UP   | -         | Vegetative storage protein/acid phosphatase domain containing protein                                                         |
| Os05g0190300 | UP   | -         | Acid phosphatase (Class B) family protein                                                                                     |
| Os05g0190500 | UP   | OsVSP2    | Similar to Acid phosphatase                                                                                                   |
| Os05g0191500 | UP   | -         | Similar to stem 28 kDa glycoprotein                                                                                           |
| Os05g0199100 | UP   | -         | Similar to NDR1/HIN1-Like protein 2                                                                                           |
| Os05g0210600 | UP   | -         | Molecular chaperone, heat shock protein, Hsp40, DnaJ domain containing protein                                                |
| Os05g0211100 | UP   | CYP51G3   | Similar to Cytochrome P450-like protein                                                                                       |
| Os05g0273800 | UP   | -         | Similar to Soluble epoxide hydrolase                                                                                          |
| Os05g0320700 | UP   | C4H2      | Similar to Cytochrome P450                                                                                                    |
| Os05g0350900 | UP   | -         | Hypothetical conserved gene                                                                                                   |
| Os05g0353500 | UP   | -         | Similar to ATP binding protein                                                                                                |
| Os05g0361700 | UP   | OsERF     | -                                                                                                                             |
| Os05g0368000 | UP   | RH1       | Non-protein coding transcript                                                                                                 |
| Os05g0386700 | UP   | -         | Zinc finger, C2H2-type domain containing protein                                                                              |
| Os05g0402900 | UP   | OsBphi262 | Similar to EDGP                                                                                                               |
| Os05g0406300 | UP   | -         | Hypothetical protein                                                                                                          |
| Os05g0410200 | UP   | Hsr203j   | Alpha/beta hydrolase fold-3 domain containing protein                                                                         |
| Os05g0427900 | UP   | -         | Similar to DnaJ-like protein                                                                                                  |
| Os05g0428100 | UP   | OsBgal6   | Similar to Beta-galactosidase                                                                                                 |
| Os05g0456300 | UP   | AKR4C15   | Aldose reductase                                                                                                              |
| Os05g0462000 | DOWN | -         | Similar to plant-specific domain TIGR01589 family protein                                                                     |
| Os05g0462500 | UP   | -         | Transmembrane receptor, eukaryota domain containing protein                                                                   |
| Os05g0480400 | UP   | -         | Serine/threonine protein kinase domain containing protein                                                                     |
| Os05g0497200 | UP   | ERF130    | AP2/ERF (APETALA2/ethylene-responsive factor) protein, Regulation of spikelet meristem determinancy and floral organ identity |
| Os05g0499800 | UP   | UGT705A3  | UDP-glucuronosyl/UDP-glucosyltransferase family protein                                                                       |
| Os05g0501001 | UP   | -         | Hypothetical gene                                                                                                             |
| Os05g0514400 | UP   | -         | Hypothetical conserved gene                                                                                                   |
| Os05g0522600 | UP   | -         | Leucine-rich repeat, plant specific containing protein                                                                        |
| Os05g0535900 | UP   | -         | IQ calmodulin-binding region domain containing protein                                                                        |
| Os05g0550800 | UP   | -         | Serine/threonine protein kinase domain containing protein                                                                     |
| Os05g0566400 | UP   | OsMPK7    | Similar to Blast and wounding induced mitogen-activated protein kinase                                                        |
| Os05g0576600 | UP   | -         | Conserved hypothetical protein                                                                                                |
| Os05g0585400 | UP   | -         | Similar to Protein ABIL1                                                                                                      |
| Os06g0109300 | UP   | -         | Protein of unknown function DUF6, transmembrane domain containing protein                                                     |
| Os06g0117101 | UP   | -         | Hypothetical gene                                                                                                             |
| Os06g0123000 | UP   | -         | Conserved hypothetical protein                                                                                                |

|              |      |                |                                                                               |
|--------------|------|----------------|-------------------------------------------------------------------------------|
| Os06g0127100 | UP   | OsDREB1<br>C   | Dehydration-responsive element-binding protein 1C                             |
| Os06g0131700 | UP   | ONAC007        | Similar to NAM protein                                                        |
| Os06g0143400 | UP   | FATB1          | Similar to Acyl-ACP thioesterase (Fragment)                                   |
| Os06g0147100 | DOWN | -              | Similar to cDNA clone:J023088C01, full insert sequence                        |
| Os06g0163300 | UP   | -              | Harpin-induced 1 domain containing protein                                    |
| Os06g0203200 | UP   | -              | Flavin-containing monooxygenase FMO family protein                            |
| Os06g0203600 | UP   | CHI2           | Chalcone isomerase domain containing protein                                  |
| Os06g0223800 | UP   | CSIL1          | C2 calcium-dependent membrane targeting domain containing protein             |
| Os06g0247900 | UP   | OsGH9B9        | Similar to Endo-beta-1,4-glucanase precursor (EC 3.2.1.4)                     |
| Os06g0270200 | UP   | OsHAK24        | Similar to Potassium transporter 24                                           |
| Os06g0284200 | UP   | -              | Protein of unknown function DUF246, plant family protein                      |
| Os06g0318500 | UP   | OsNHX4         | Similar to Sodium/hydrogen exchanger                                          |
| Os06g0529900 | UP   | -              | Hypothetical conserved gene                                                   |
| Os06g0538400 | UP   | -              | Conserved hypothetical protein                                                |
| Os06g0559400 | DOWN | -              | Conserved hypothetical protein                                                |
| Os06g0566500 | UP   | -              | Hypothetical conserved gene                                                   |
| Os06g0573600 | UP   | OsBgal2        | Similar to Beta-galactosidase precursor (EC 3.2.1.23) (Lactase)               |
| Os06g0579200 | DOWN | OsLCT1         | Low-affinity cation transporter, Regulation of cadmium transport to the grain |
| Os06g0589500 | UP   | -              | Conserved hypothetical protein                                                |
| Os06g0594600 | UP   | OsAT10         | BAHD acyltransferase, Glucuronoarabinoxylan modification in grass cell wall   |
| Os06g0595900 | UP   | LC3            | SPOC domain-containing protein, Regulator of leaf inclination                 |
| Os06g0598800 | UP   | WSL1           | Similar to Fatty acid elongase 1-like protein                                 |
| Os06g0671000 | UP   | OsHAK13        | Similar to Potassium transporter 1 (AtPOT1) (AtKUP1) (AtKT1)                  |
| Os06g0678500 | DOWN | -              | Hypothetical conserved gene                                                   |
| Os06g0707200 | UP   | -              | Glycosyltransferase AER61, uncharacterized domain containing protein          |
| Os06g0725200 | UP   | OsGELP90       | Lipase, GDSL domain containing protein                                        |
| Os06g0730150 | UP   | -              | Hypothetical protein                                                          |
| Os07g0116600 | DOWN | -              | Similar to HLS1 (HOOKLESS 1); N-acetyltransferase                             |
| Os07g0121000 | UP   | -              | Protein of unknown function DUF1719, Oryza sativa family protein              |
| Os07g0121750 | UP   | -              | Conserved hypothetical protein                                                |
| Os07g0122100 | UP   | -              | Protein of unknown function DUF1719, Oryza sativa family protein              |
| Os07g0134200 | UP   | OsRLCK2<br>22  | Receptor-like protein kinase 3                                                |
| Os07g0148800 | UP   | -              | Conserved hypothetical protein                                                |
| Os07g0192000 | UP   | -              | ATPase, AAA-type, core domain containing protein                              |
| Os07g0194800 | UP   | -              | Similar to galactosyltransferase/ transferase, transferring hexosyl groups    |
| Os07g0208500 | UP   | OsCesA8        | Similar to Cellulose synthase-4                                               |
| Os07g0209100 | DOWN | -              | Similar to Seed imbibition protein (Fragment)                                 |
| Os07g0241500 | UP   | OsUGT71<br>0C2 | UDP-glucuronosyl/UDP-glucosyltransferase family protein                       |

|              |      |             |                                                                                                               |
|--------------|------|-------------|---------------------------------------------------------------------------------------------------------------|
| Os07g0241600 | UP   | -           | UDP-glucuronosyl/UDP-glucosyltransferase domain containing protein                                            |
| Os07g0252400 | UP   | OsCesA6     | Similar to Cellulose synthase-8                                                                               |
| Os07g0274700 | UP   | -           | HvB12D protein (B12Dg1 protein)                                                                               |
| Os07g0413800 | UP   | -           | Conserved hypothetical protein                                                                                |
| Os07g0414000 | UP   | -           | Transferase domain containing protein                                                                         |
| Os07g0418700 | UP   | OsRePRP2.1  | Proline-rich glycoprotein, ABA-dependent inhibition of root growth                                            |
| Os07g0450100 | UP   | -           | Hypothetical conserved gene                                                                                   |
| Os07g0457200 | UP   | -           | Hypothetical protein                                                                                          |
| Os07g0490100 | UP   | UGT709A4    | UDP-glucuronosyl/UDP-glucosyltransferase family protein                                                       |
| Os07g0490500 | UP   | -           | Xanthine/uracil/vitamin C permease family protein                                                             |
| Os07g0523965 | UP   | -           | Similar to Glucose-6-phosphate/phosphate-translocator precursor                                               |
| Os07g0526400 | UP   | OsPKS15     | Polyketide synthase, type III domain containing protein                                                       |
| Os07g0526600 | UP   | -           | Alpha/beta hydrolase fold-3 domain containing protein                                                         |
| Os07g0550900 | UP   | -           | Similar to Receptor-like protein kinase 6                                                                     |
| Os07g0560400 | UP   | -           | Hypothetical protein                                                                                          |
| Os07g0564500 | UP   | -           | Pyridine nucleotide-disulphide oxidoreductase, NAD-binding region domain containing protein                   |
| Os07g0569800 | UP   | -           | Similar to protein kinase                                                                                     |
| Os07g0572400 | UP   | -           | Conserved hypothetical protein                                                                                |
| Os07g0597200 | UP   | -           | Protein kinase, core domain containing protein                                                                |
| Os07g0598000 | UP   | -           | Similar to NADPH HC toxin reductase (Fragment)                                                                |
| Os07g0601600 | UP   | -           | Similar to VEP1 (VEIN PATTERNING 1); binding / catalytic                                                      |
| Os07g0615200 | UP   | OsJAZ6      | Tify domain containing protein                                                                                |
| Os07g0622000 | UP   | SAPK2       | Serine/threonine protein kinase, Hyperosmotic stress response, Absciscic acid (ABA)-dependent gene regulation |
| Os07g0622200 | UP   | OsDAHP1     | 3-Deoxy-D-arabino-heptulosonate 7-phosphate synthase, Chorismate biosynthesis                                 |
| Os07g0628500 | UP   | OsbHLH1     | Basic helix-loop-helix dimerisation region bHLH domain containing protein                                     |
| Os07g0633600 | UP   | -           | Similar to SUB1; calcium ion binding                                                                          |
| Os07g0635500 | UP   | Os-CYP709C5 | Similar to Cytochrome P450                                                                                    |
| Os07g0656200 | DOWN | Os7bglu26   | Similar to Beta-glucosidase 26                                                                                |
| Os07g0674400 | UP   | -           | Pollen Ole e 1 allergen/extensin domain containing protein                                                    |
| Os07g0683900 | UP   | -           | Ricin B-related lectin domain containing protein                                                              |
| Os07g0685500 | UP   | -           | Alpha/beta hydrolase family protein                                                                           |
| Os07g0686300 | DOWN | -           | Zinc finger, RING/FYVE/PHD-type domain containing protein                                                     |
| Os08g0103100 | UP   | -           | Hypothetical protein                                                                                          |
| Os08g0137800 | UP   | OsUCL24     | Cupredoxin domain containing protein                                                                          |

|              |      |           |                                                                                                                                                     |
|--------------|------|-----------|-----------------------------------------------------------------------------------------------------------------------------------------------------|
| Os08g0140300 | UP   | TDC1      | Aromatic L-amino acid decarboxylase (AADC), Senescence-induced serotonin biosynthesis                                                               |
| Os08g0140700 | UP   | PR5       | Similar to CsAtPR5                                                                                                                                  |
| Os08g0141400 | UP   | -         | Similar to mRNA, clone: RTFL01-03-I20                                                                                                               |
| Os08g0150600 | DOWN | -         | F-box domain, cyclin-like domain containing protein                                                                                                 |
| Os08g0168000 | UP   | OsTPS31   | Similar to Sesquiterpene synthase                                                                                                                   |
| Os08g0200750 | DOWN | -         | Hypothetical protein                                                                                                                                |
| Os08g0238200 | UP   | -         | Dienelactone hydrolase domain containing protein                                                                                                    |
| Os08g0249000 | UP   | OsBBX25   | Zinc finger, B-box domain containing protein                                                                                                        |
| Os08g0280600 | UP   | -         | Reticulon domain containing protein                                                                                                                 |
| Os08g0356700 | UP   | -         | Protein of unknown function DUF247, plant family protein                                                                                            |
| Os08g0374600 | UP   | OsRLCK253 | Similar to Receptor kinase-like protein                                                                                                             |
| Os08g0384500 | UP   | OsA-BCG44 | ABC transporter-like domain containing protein                                                                                                      |
| Os08g0410950 | UP   | -         | Hypothetical conserved gene                                                                                                                         |
| Os08g0417000 | UP   | -         | 2OG-Fe(II) oxygenase domain containing protein                                                                                                      |
| Os08g0434300 | UP   | MDH       | Similar to Malate dehydrogenase precursor (EC 1.1.1.37)                                                                                             |
| Os08g0441500 | UP   | OsCCR     | Cinnamoyl-CoA reductase, Lignin formatio                                                                                                            |
| Os08g0453200 | DOWN | -         | Similar to Auxin-repressed protein                                                                                                                  |
| Os08g0460600 | DOWN | OsCKX11   | Similar to Cytokinin dehydrogenase 11                                                                                                               |
| Os08g0474000 | UP   | DERF3     | Similar to AP2 domain containing protein RAP2.6 (Fragment)                                                                                          |
| Os08g0489300 | UP   | TagI      | Methyladenine glycosylase domain containing protein                                                                                                 |
| Os08g0490000 | UP   | OsbHLH031 | Helix-loop-helix DNA-binding domain containing protein                                                                                              |
| Os08g0498400 | UP   | ROMT-17   | Similar to Caffeoyle-CoA 3-O-methyltransferase (Fragment)                                                                                           |
| Os08g0514033 | UP   | -         | Hypothetical protein                                                                                                                                |
| Os08g0520000 | UP   | BTI-1     | Mitochondrial substrate carrier family protein                                                                                                      |
| Os08g0526200 | UP   | -         | Conserved hypothetical protein                                                                                                                      |
| Os08g0531100 | UP   | -         | MAP65/ASE1 family protein                                                                                                                           |
| Os08g0532200 | UP   | GSA       | Similar to Glutamate-1-semialdehyde 2,1-aminomutase, chloroplast precursor (EC 5.4.3.8) (GSA) (Glutamate-1-semialdehyde aminotransferase) (GSA- AT) |
| Os08g0542700 | UP   | -         | Ankyrin repeat containing protein                                                                                                                   |
| Os08g0549000 | DOWN | OsGL1A    | R2R3 MYB transcription factor, Homologue of Arabidopsis transcription factor GL                                                                     |
| Os08g0560300 | UP   | -         | Protein of unknown function DUF597 family protein                                                                                                   |
| Os09g0106700 | UP   | R2R3-MYB  | Similar to Myb proto-oncogene protein (C-myb)                                                                                                       |
| Os09g0249400 | UP   | -         | Uncharacterised protein family UPF0497, trans-membrane plant domain containing protein                                                              |

|              |      |             |                                                                                                                   |
|--------------|------|-------------|-------------------------------------------------------------------------------------------------------------------|
| Os09g0255400 | UP   | IGPS        | Similar to Indole-3-glycerol phosphate synthase, chloroplast precursor (EC 4.1.1.48) (IGPS)                       |
| Os09g0268100 | DOWN | -           | Similar to lectin-like receptor kinase 7                                                                          |
| Os09g0322400 | DOWN | -           | Proteolipid membrane potential modulator domain containing protein                                                |
| Os09g0322500 | DOWN | -           | Hypothetical conserved gene                                                                                       |
| Os09g0343600 | DOWN | -           | Non-protein coding transcript                                                                                     |
| Os09g0380600 | UP   | -           | Protein of unknown function DUF295 domain containing protein                                                      |
| Os09g0419200 | UP   | OsCCR19     | NAD(P)-binding domain containing protein                                                                          |
| Os09g0420300 | UP   | -           | Methyladenine glycosylase domain containing protein                                                               |
| Os09g0426800 | UP   | WSL2        | Homologue of WAX2/GL1, Synthesis of leaf cuticular wax                                                            |
| Os09g0441400 | UP   | -           | Similar to Elicitor-inducible cytochrome P450                                                                     |
| Os09g0442100 | UP   | OsRLCK272   | Protein kinase, core domain containing protein                                                                    |
| Os09g0450300 | UP   | -           | MAP65/ASE1 family protein                                                                                         |
| Os09g0456800 | UP   | HSFB1       | Similar to Heat stress transcription factor Spl7 (Heat shock transcription factor) (Heat shock factor RHSF10)     |
| Os09g0471200 | UP   | -           | Similar to WAK80 - OsWAK receptor-like protein kinase                                                             |
| Os09g0494200 | UP   | BC15        | Membrane-associated chitinase-like protein, Cellulose biosynthesis                                                |
| Os09g0502500 | UP   | -           | Alcohol dehydrogenase superfamily, zinc-containing protein                                                        |
| Os09g0511900 | UP   | Os9bglu33   | Similar to Beta-glucosidase 32                                                                                    |
| Os09g0524800 | UP   | OsBAG1      | Apoptosis regulator Bcl-2 protein, BAG domain containing protein                                                  |
| Os09g0533900 | UP   | OsGH9B5     | Similar to CEL5=CELLULASE 5 (Fragment)                                                                            |
| Os09g0545300 | DOWN | SAUR39      | SAUR family protein, Negative regulator of auxin synthesis and transport                                          |
| Os09g0556700 | UP   | OsSET37     | SET domain domain containing protein                                                                              |
| Os09g0562600 | UP   | WAK92       | Wall-associated kinase, Positive regulation of rice blast resistance                                              |
| Os10g0127900 | UP   | OsFbx352    | Similar to F-box domain containing protein, expressed                                                             |
| Os10g0144700 | UP   | -           | Cytochrome P450 domain containing protein                                                                         |
| Os10g0170000 | UP   | -           | Nucleotide-sensitive chloride conductance regulator family protein                                                |
| Os10g0181100 | DOWN | -           | Conserved hypothetical protein                                                                                    |
| Os10g0195250 | DOWN | -           | Conserved hypothetical protein                                                                                    |
| Os10g0392400 | UP   | Os-TIFY11d  | Tify domain containing protein                                                                                    |
| Os10g0461100 | UP   | -           | Similar to Keratin, type II cytoskeletal 1 (Cytokeratin 1) (K1) (CK 1) (67 kDa cyto keratin) (Hair alpha protein) |
| Os10g0468500 | UP   | -           | Serine/threonine protein kinase-related domain containing protein                                                 |
| Os10g0469600 | UP   | -           | Similar to Leucine Rich Repeat family protein, expressed                                                          |
| Os10g0478100 | UP   | -           | Heat shock protein DnaJ, N-terminal domain containing protein                                                     |
| Os10g0503250 | UP   | -           | Hypothetical protein                                                                                              |
| Os10g0512800 | UP   | OsRF-PHC-10 | Similar to predicted protein                                                                                      |

|              |      |           |                                                                                                                                                 |
|--------------|------|-----------|-------------------------------------------------------------------------------------------------------------------------------------------------|
| Os10g0516200 | UP   | OsRLCK303 | Serine/threonine protein kinase domain containing protein                                                                                       |
| Os10g0517500 | UP   | RRJ1      | Cys/Met metabolism, pyridoxal phosphate-dependent enzyme domain containing protein                                                              |
| Os10g0532600 | UP   | OsOFP17   | Protein of unknown function DUF623, plant domain containing protein                                                                             |
| Os10g0533150 | UP   | -         | Similar to BRASSINOSTEROID INSENSITIVE 1-associated receptor kinase 1                                                                           |
| Os10g0534700 | UP   | -         | Protein of unknown function DUF604 family protein                                                                                               |
| Os10g0536400 | UP   | OsF3H-2   | Similar to Oxidoreductase, 2OG-Fe oxygenase family protein, expressed                                                                           |
| Os10g0537800 | UP   | -         | Peptidase aspartic, catalytic domain containing protein                                                                                         |
| Os10g0575000 | UP   | OsbHLH009 | JAZ-interacting transcription factor, Positive regulator of jasmonate (JA) signaling pathway, Bacterial blight resistance, Spikelet development |
| Os10g0577600 | UP   | JMJ706    | H3K9 demethylase, Floral organ development                                                                                                      |
| Os10g0580900 | UP   | -         | Conserved hypothetical protein                                                                                                                  |
| Os11g0100600 | UP   | -         | Alpha/beta hydrolase family protein                                                                                                             |
| Os11g0108800 | UP   | -         | Similar to Protein kinase domain containing protein, expressed                                                                                  |
| Os11g0109700 | UP   | -         | Protein of unknown function Cys-rich family protein                                                                                             |
| Os11g0116400 | UP   | -         | Similar to Elongation factor P (EF-P)                                                                                                           |
| Os11g0155100 | UP   | OsFbox568 | Similar to F-box domain containing protein                                                                                                      |
| Os11g0178800 | UP   | -         | Plant disease resistance response protein family protein                                                                                        |
| Os11g0180000 | UP   | -         | Plant disease resistance response protein family protein                                                                                        |
| Os11g0246166 | DOWN | -         | Hypothetical protein                                                                                                                            |
| Os11g0249300 | UP   | -         | Conserved hypothetical protein                                                                                                                  |
| Os11g0257800 | DOWN | -         | Hypothetical protein                                                                                                                            |
| Os11g0275200 | UP   | -         | Similar to Endo-1,3;1,4-beta-D-glucanase precursor (EC 3.2.1.-)                                                                                 |
| Os11g0275500 | UP   | -         | Similar to Endo-1,3;1,4-beta-D-glucanase precursor (EC 3.2.1.-)                                                                                 |
| Os11g0444700 | DOWN | OsPB1     | Octicosapeptide/Phox/Bem1p domain containing protein                                                                                            |
| Os11g0444900 | DOWN | -         | Octicosapeptide/Phox/Bem1p domain containing protein                                                                                            |
| Os11g0448700 | UP   | OsRALF-31 | Conserved hypothetical protein                                                                                                                  |
| Os11g0455800 | UP   | OsSHM2    | Similar to Serine hydroxymethyltransferase                                                                                                      |
| Os11g0482901 | UP   | -         | Hypothetical gene                                                                                                                               |
| Os11g0496500 | UP   | -         | Similar to AT.I.24-5 protein (Fragment)                                                                                                         |
| Os11g0531700 | UP   | -         | NUDIX hydrolase domain containing protein                                                                                                       |
| Os11g0536000 | UP   | -         | Non-protein coding transcript                                                                                                                   |
| Os11g0566800 | UP   | OsPKS27   | Similar to Bibenzyl synthase (EC 2.3.1.-)                                                                                                       |
| Os11g0569300 | DOWN | -         | Serine/threonine protein kinase domain containing protein                                                                                       |
| Os11g0592600 | UP   | -         | Targeting for Xklp2 family protein                                                                                                              |
| Os11g0619800 | UP   | -         | Kelch related domain containing protein                                                                                                         |
| Os11g0629400 | UP   | -         | Similar to Nitrilase associated protein-like                                                                                                    |
| Os11g0644700 | UP   | -         | Plant disease resistance response protein family protein                                                                                        |

|              |      |         |                                                                                                                                               |
|--------------|------|---------|-----------------------------------------------------------------------------------------------------------------------------------------------|
| Os11g0645400 | UP   | -       | Plant disease resistance response protein family protein                                                                                      |
| Os11g0671100 | DOWN | -       | Hypothetical protein                                                                                                                          |
| Os11g0674400 | UP   | -       | Similar to NB-ARC domain containing protein, expressed                                                                                        |
| Os11g0701700 | UP   | -       | Hypothetical gene                                                                                                                             |
| Os12g0106300 | UP   | OsTBL1  | Xylan acetyltransferase, Resistance to bacterial leaf blight diseases                                                                         |
| Os12g0108100 | UP   | -       | Similar to Ser Thr specific protein kinase-like protein                                                                                       |
| Os12g0115900 | UP   | -       | Translation elongation factor P domain containing protein                                                                                     |
| Os12g0149900 | UP   | -       | IQ calmodulin-binding region domain containing protein                                                                                        |
| Os12g0152100 | UP   | -       | Alpha/beta hydrolase fold-1 domain containing protein                                                                                         |
| Os12g0174200 | UP   | -       | Conserved hypothetical protein                                                                                                                |
| Os12g0182500 | UP   | -       | Conserved hypothetical protein                                                                                                                |
| Os12g0190400 | UP   | -       | Similar to NifS-like protein                                                                                                                  |
| Os12g0225900 | UP   | -       | Allyl alcohol dehydrogenase                                                                                                                   |
| Os12g0443000 | UP   | -       | Similar to Cytochrome P450 family protein, expressed                                                                                          |
| Os12g0443500 | UP   | -       | Similar to UDP-glucose 6-dehydrogenase (EC 1.1.1.22) (UDP-Glc dehydrogenase) (UDP-GlcDH) (UDPGDH)                                             |
| Os12g0485150 | UP   | -       | Conserved hypothetical protein                                                                                                                |
| Os12g0530100 | UP   | PRX138  | Similar to Peroxidase 24 precursor (EC 1.11.1.7) (Atperox P24) (ATP47)                                                                        |
| Os12g0548300 | UP   | OsNDPK2 | Nucleoside diphosphate kinase, Regulation of chloroplast development and chlorophyll biosynthesis, Abiotic stress response (ABA and salinity) |
| Os12g0573600 | UP   | -       | Similar to predicted protein                                                                                                                  |
| Os12g0604300 | UP   | -       | Hypothetical gene                                                                                                                             |
| Os12g0616400 | UP   | OsPCF8  | Similar to Isoform 2 of Transcription factor PCF8                                                                                             |
| Os12g0624800 | DOWN | -       | Conserved hypothetical protein                                                                                                                |
| Os12g0629300 | UP   | -       | Similar to Thaumatin-like protein                                                                                                             |
| Os12g0635400 | UP   | -       | VQ domain containing protein                                                                                                                  |

**Specific DEGs in B3\_vs\_A3 comparing B1\_vs\_A1, B2\_vs\_A2 and B3\_vs\_A3**

| Gene ID         | up/down | Gene name        | Description                                 |
|-----------------|---------|------------------|---------------------------------------------|
| ENSRNA049471366 | UP      | MIR159           | microRNA MIR159                             |
| ENSRNA049475944 | UP      | LSU_rRNA_eukarya | Eukaryotic large subunit ribosomal RNA      |
| ENSRNA049476502 | UP      | 5_8S_rRNA        | 5.8S ribosomal RNA                          |
| Os01g0110200    | UP      | OsAGP12          | Conserved hypothetical protein              |
| Os01g0110400    | UP      | -                | Similar to Acetyl-CoA C-acetyltransferase   |
| Os01g0112600    | DOWN    | -                | Conserved hypothetical protein              |
| Os01g0113200    | DOWN    | OsRLCK2          | Similar to Receptor serine/threonine kinase |
| Os01g0114550    | UP      | -                | Non-protein coding transcript               |

|              |      |              |                                                                                                                        |
|--------------|------|--------------|------------------------------------------------------------------------------------------------------------------------|
| Os01g0115600 | DOWN | OsRLCK1<br>1 | Similar to LRK14                                                                                                       |
| Os01g0117100 | DOWN | -            | Similar to Receptor kinase LRK10                                                                                       |
| Os01g0117300 | DOWN | OsRLCK1<br>7 | Similar to Receptor kinase LRK10                                                                                       |
| Os01g0117700 | DOWN | -            | Similar to LRK14                                                                                                       |
| Os01g0118066 | DOWN | -            | Non-protein coding transcript                                                                                          |
| Os01g0123700 | UP   | -            | Zinc finger, RING-type domain containing protein                                                                       |
| Os01g0124900 | DOWN | -            | Seven-in-absentia protein, sina domain containing protein                                                              |
| Os01g0127400 | DOWN | -            | Protein of unknown function DUF3326 domain containing protein                                                          |
| Os01g0127600 | UP   | -            | Similar to Bowman-Birk type proteinase inhibitor D-II precursor (IV)                                                   |
| Os01g0132000 | UP   | IAI2         | Similar to Wound-induced protease inhibitor (WIP1)                                                                     |
| Os01g0134500 | DOWN | OsSTE1       | Similar to Delta-7-sterol-C5(6)-desaturase (EC 1.3.3.-) (Delta-7-C-5 sterol de-saturase) (Delta7-sterol-C5-desaturase) |
| Os01g0134700 | DOWN | -            | Calmodulin binding protein-like family protein                                                                         |
| Os01g0136450 | DOWN | -            | Conserved hypothetical protein                                                                                         |
| Os01g0137700 | DOWN | -            | Conserved hypothetical protein                                                                                         |
| Os01g0137800 | DOWN | -            | Non-protein coding transcript                                                                                          |
| Os01g0138900 | UP   | -            | Mandelate racemase/muconate lactonizing enzyme family protein                                                          |
| Os01g0141700 | DOWN | OsWD40-<br>2 | Similar to predicted protein                                                                                           |
| Os01g0142100 | DOWN | -            | Peptidase M50 family protein                                                                                           |
| Os01g0143300 | UP   | -            | Similar to Glycine-rich protein (Fragment)                                                                             |
| Os01g0144000 | UP   | -            | Conserved hypothetical protein                                                                                         |
| Os01g0147900 | UP   | OsTPI1       | Triosephosphate isomerase, Glycolytic enzyme, Key component in XA3/XA26-mediated resistance to Xo                      |
| Os01g0148000 | DOWN | -            | Similar to predicted protein                                                                                           |
| Os01g0150700 | DOWN | -            | Hypothetical conserved gene                                                                                            |
| Os01g0152951 | DOWN | -            | Hypothetical conserved gene                                                                                            |
| Os01g0154000 | DOWN | -            | Conserved hypothetical protein                                                                                         |
| Os01g0160100 | UP   | -            | Similar to Pyruvate decarboxylase isozyme 2 (EC 4.1.1.1) (PDC) (Fragment)                                              |
| Os01g0161300 | DOWN | -            | Hypothetical conserved gene                                                                                            |
| Os01g0162001 | DOWN | -            | Hypothetical gene                                                                                                      |
| Os01g0162200 | DOWN | -            | Leucine-rich repeat domain containing protein                                                                          |
| Os01g0166800 | DOWN | -            | Similar to ETG1 (E2F TARGET GENE 1)                                                                                    |
| Os01g0168800 | UP   | -            | Alpha/beta hydrolase fold-1 domain containing protein                                                                  |
| Os01g0173000 | DOWN | -            | Putative thiol-disulphide oxidoreductase DCC domain containing protein                                                 |
| Os01g0178400 | DOWN | -            | Similar to Protein phosphatase 2A B'kappa subunit                                                                      |
| Os01g0179800 | DOWN | -            | TMS membrane protein/tumour differentially expressed protein family protein                                            |
| Os01g0180300 | DOWN | -            | Lipoprotein, type 6 family protein                                                                                     |

|              |      |            |                                                                           |
|--------------|------|------------|---------------------------------------------------------------------------|
| Os01g0180800 | UP   | -          | Heat shock protein Hsp70 family protein                                   |
| Os01g0188200 | DOWN | -          | Endonuclease/exonuclease/phosphatase domain containing protein            |
| Os01g0188900 | DOWN | -          | Conserved hypothetical protein                                            |
| Os01g0192000 | DOWN | -          | Similar to Ankyrin-like protein-like protein                              |
| Os01g0192550 | UP   | DOS        | CCCH-type zinc finger protein, Negative regulator for leaf senescence     |
| Os01g0195300 | DOWN | -          | Conserved hypothetical protein                                            |
| Os01g0197350 | DOWN | -          | Hypothetical conserved gene                                               |
| Os01g0198500 | UP   | -          | Hypothetical genes                                                        |
| Os01g0205200 | DOWN | -          | Conserved hypothetical protein                                            |
| Os01g0205500 | UP   | -          | Pentatricopeptide repeat domain containing protein                        |
| Os01g0208000 | UP   | -          | Similar to 60S ribosomal protein L11-2 (L16). Splice isoform 2            |
| Os01g0210900 | UP   | OsUMA-MIT4 | Protein of unknown function DUF6, transmembrane domain containing protein |
| Os01g0215750 | UP   | -          | Cytochrome P450 family protein                                            |
| Os01g0216000 | UP   | -          | Hypothetical gene                                                         |
| Os01g0217500 | DOWN | OsGELP7    | Lipase, GDSL domain containing protein                                    |
| Os01g0218100 | UP   | OsDJ-1A    | ThiJ/PfpI domain containing protein                                       |
| Os01g0223200 | UP   | OsHHLH037  | Helix-loop-helix DNA-binding domain containing protein                    |
| Os01g0225550 | UP   | OsGELP12   | Lipase, GDSL domain containing protein                                    |
| Os01g0226300 | UP   | -          | Hypothetical gene                                                         |
| Os01g0226600 | UP   | -          | Reticulon family protein                                                  |
| Os01g0227800 | DOWN | SLAC       | Similar to C4-dicarboxylate transporter/malic acid transport protein      |
| Os01g0229900 | DOWN | -          | Similar to cDNA, clone: J075083L18, full insert sequence                  |
| Os01g0231700 | UP   | -          | Similar to Ubiquitin-conjugating enzyme family protein, expressed         |
| Os01g0231800 | UP   | -          | Similar to 60S acidic ribosomal protein P2-B (CaRP2B)                     |
| Os01g0234001 | DOWN | -          | Similar to cDNA clone: J033025F17, full insert sequence                   |
| Os01g0236900 | DOWN | -          | Hypothetical conserved gene                                               |
| Os01g0239200 | DOWN | -          | Hypothetical protein                                                      |
| Os01g0242300 | UP   | OsTPT1     | Similar to Phosphate translocator (Fragment)                              |
| Os01g0257100 | UP   | -          | Optic atrophy 3 family protein                                            |
| Os01g0260500 | DOWN | OsRALF-5   | Rapid ALkalinization Factor family protein                                |
| Os01g0262700 | DOWN | -          | Hypothetical conserved gene                                               |
| Os01g0268300 | DOWN | -          | Similar to predicted protein                                              |
| Os01g0272600 | UP   | -          | Similar to DNA gyrase B subunit                                           |
| Os01g0274100 | UP   | OsRDN      | Similar to Root determined nodulation 1                                   |
| Os01g0274800 | UP   | OsYUCC A10 | Similar to disulfide oxidoreductase/ monooxygenase/ oxidoreductase        |
| Os01g0276700 | UP   | CSA        | R2R3-type MYB transcription factor, Sugar partitioning into anthe         |
| Os01g0277500 | DOWN | -          | Similar to Pyruvate kinase, cytosolic isozyme (EC 2.7.1.40) (PK)          |
| Os01g0278000 | DOWN | -          | Conserved hypothetical protein                                            |

|              |      |          |                                                                                                                             |
|--------------|------|----------|-----------------------------------------------------------------------------------------------------------------------------|
| Os01g0278050 | DOWN | OsDof4   | Dof (DNA binding with one finger) transcription factor, C2-C2 zinc finger transcription factor, Regulation of flowering tim |
| Os01g0279400 | DOWN | OsVQ1    | VQ domain containing protein                                                                                                |
| Os01g0281100 | UP   | -        | Hypothetical conserved gene                                                                                                 |
| Os01g0283600 | UP   | OsZIFL2  | Major facilitator superfamily antiporter                                                                                    |
| Os01g0283700 | UP   | -        | Conserved hypothetical protein                                                                                              |
| Os01g0286600 | DOWN | OsCCR4   | Similar to Cinnamoyl CoA reductase                                                                                          |
| Os01g0287400 | UP   | OsCCR5   | Similar to Cinnamoyl-CoA reductase (EC 1.2.1.44)                                                                            |
| Os01g0290650 | UP   | PPX      | Similar to Plastidal protoporphyrinogen oxidase                                                                             |
| Os01g0290700 | UP   | -        | Similar to Hydrophobic protein LTI6A (Low temperature-induced protein 6A)                                                   |
| Os01g0290901 | DOWN | -        | Non-protein coding transcript                                                                                               |
| Os01g0292700 | DOWN | OsABCB1  | Similar to CjMDR1                                                                                                           |
| Os01g0293000 | DOWN | -        | Non-protein coding transcript                                                                                               |
| Os01g0296166 | UP   | OsIF     | Intermediate filament, Cytoskeleton protein, Tolerance to salinity and heat stres                                           |
| Os01g0297200 | UP   | OsSAMS3  | S-adenosyl-l-methionine synthetase, Histone H3K4me3 and DNA methylation, Regulation of gene expression related to flowerin  |
| Os01g0301500 | DOWN | -        | Hypothetical protein                                                                                                        |
| Os01g0302100 | UP   | -        | ATPase, AAA-type, core domain containing protein                                                                            |
| Os01g0306800 | DOWN | -        | Pentatricopeptide repeat domain containing protein                                                                          |
| Os01g0309800 | UP   | -        | Conserved hypothetical protein                                                                                              |
| Os01g0311100 | DOWN | -        | Conserved hypothetical protein                                                                                              |
| Os01g0314100 | UP   | -        | Similar to Hydrogenase expression/formation protein hypB                                                                    |
| Os01g0320700 | DOWN | OsRFP2-4 | Similar to RING-H2 finger protein ATL2L                                                                                     |
| Os01g0321900 | DOWN | -        | Catalytic domain of components of various dehydrogenase complexes containing protein                                        |
| Os01g0323300 | DOWN | -        | Hypothetical protein                                                                                                        |
| Os01g0327100 | UP   | -        | Hypothetical conserved gene                                                                                                 |
| Os01g0337100 | UP   | -        | Similar to Ser Thr specific protein kinase-like protein                                                                     |
| Os01g0346250 | DOWN | -        | RNA-binding, CRM domain domain containing protein                                                                           |
| Os01g0348900 | UP   | prx15    | Haem peroxidase family protein                                                                                              |
| Os01g0349600 | DOWN | OsTPS1   | Similar to Sesquiterpene synthase                                                                                           |
| Os01g0351200 | DOWN | -        | Conserved hypothetical protein                                                                                              |
| Os01g0354700 | DOWN | OsJRL    | Jacalin-related mannose-binding lectin, Salinity toleranc                                                                   |
| Os01g0358100 | UP   | -        | Hypothetical protein                                                                                                        |
| Os01g0362100 | DOWN | PARP2A   | Similar to Poly                                                                                                             |
| Os01g0364400 | DOWN | -        | Pre-mRNA cleavage complex II Clp1 domain containing protein                                                                 |
| Os01g0369700 | UP   | OsRALF-6 | Rapid ALkalinization Factor family protein                                                                                  |
| Os01g0371200 | UP   | -        | Esterase/lipase/thioesterase domain containing protein                                                                      |

|              |      |               |                                                                                                                                          |
|--------------|------|---------------|------------------------------------------------------------------------------------------------------------------------------------------|
| Os01g0382450 | UP   | OsRLCK3<br>5  | Protein kinase, catalytic domain domain containing protein                                                                               |
| Os01g0384800 | DOWN | OsGSTF5       | Similar to Glutathione S-transferase GST 8 (EC 2.5.1.18)                                                                                 |
| Os01g0389700 | DOWN | OsOPR10       | Similar to 12-oxo-phytodienoic acid reductase6                                                                                           |
| Os01g0505700 | UP   | OsGSTF1       | Similar to Glutathione-S-transferase 19E50                                                                                               |
| Os01g0510600 | DOWN | DHQDT/S<br>DH | Similar to shikimate biosynthesis protein aroDE                                                                                          |
| Os01g0511100 | UP   | -             | Similar to Kinesin heavy chain (Fragment)                                                                                                |
| Os01g0520180 | DOWN | -             | Conserved hypothetical protein                                                                                                           |
| Os01g0520600 | UP   | -             | Protein of unknown function DUF679 family protein                                                                                        |
| Os01g0521250 | UP   | -             | Conserved hypothetical protein                                                                                                           |
| Os01g0533900 | UP   | OsFLU1        | Tetratricopeptide-like helical domain containing protein                                                                                 |
| Os01g0536000 | DOWN | -             | UspA domain containing protein                                                                                                           |
| Os01g0550600 | DOWN | -             | Hypothetical conserved gene                                                                                                              |
| Os01g0552000 | DOWN | -             | NB-ARC domain containing protein                                                                                                         |
| Os01g0557500 | DOWN | -             | Non-protein coding transcript                                                                                                            |
| Os01g0558850 | DOWN | OsABCB2       | Similar to Multidrug resistance protein 1 homolog                                                                                        |
| Os01g0559600 | DOWN | OsCIPK08      | Similar to CBL-interacting serine/threonine-protein kinase 24 (EC 2.7.1.37) (SNF1-related kinase 3.11) (SALT OVERLY SENSITIVE 2 protein) |
| Os01g0559900 | UP   | -             | Conserved hypothetical protein                                                                                                           |
| Os01g0565900 | UP   | -             | Hypothetical conserved gene                                                                                                              |
| Os01g0570800 | DOWN | SRZ3          | Similar to TATA-binding protein associated factor 2N (RNA-binding protein 56) (TAFII68) (TAF(II)68)                                      |
| Os01g0575200 | DOWN | OsCAX1a       | Cation/proton exchanger 1a                                                                                                               |
| Os01g0579600 | DOWN | -             | Similar to peptidase M16 family protein / insulinase family protein                                                                      |
| Os01g0582600 | DOWN | OsVPE2        | Similar to C13 endopeptidase NP1 precursor                                                                                               |
| Os01g0588200 | UP   | OsAGP14       | Non-protein coding transcript                                                                                                            |
| Os01g0589000 | DOWN | -             | Similar to Protein transport protein Sec61 beta subunit                                                                                  |
| Os01g0594800 | UP   | -             | IQ calmodulin-binding region domain containing protein                                                                                   |
| Os01g0595600 | UP   | OsHHLH0<br>24 | Helix-loop-helix DNA-binding domain containing protein                                                                                   |
| Os01g0600000 | UP   | OsCBL9        | Similar to Calcineurin B-like protein 9                                                                                                  |
| Os01g0600900 | DOWN | -             | Phospholipase A2, active site domain containing protein                                                                                  |
| Os01g0607800 | DOWN | OSVDAC3       | Voltage-dependent anion channel                                                                                                          |
| Os01g0611100 | UP   | -             | Nucleic acid-binding, OB-fold domain containing protein                                                                                  |
| Os01g0615100 | UP   | -             | Similar to D-amino acid oxidase                                                                                                          |
| Os01g0615200 | UP   | -             | Alpha/beta hydrolase fold-1 domain containing protein                                                                                    |
| Os01g0618400 | DOWN | OsATL15       | Amino acid transporter, transmembrane domain containing protein                                                                          |
| Os01g0626400 | UP   | -             | Similar to Copia-like retroelement pol polyprotein                                                                                       |

|              |      |             |                                                                                                                              |
|--------------|------|-------------|------------------------------------------------------------------------------------------------------------------------------|
| Os01g0627500 | UP   | CAB2R       | Chlorophyll a-b binding protein 2, chloroplast precursor (LHCII type I CAB-2) (LHCP)                                         |
| Os01g0647000 | UP   | -           | Pentatricopeptide repeat domain containing protein                                                                           |
| Os01g0647200 | DOWN | OsRAN1      | Similar to GTP-binding nuclear protein Ran-2                                                                                 |
| Os01g0650800 | DOWN | OCPI2       | Chymotrypsin protease inhibitor, Salt and osmotic stress toleranc                                                            |
| Os01g0652375 | DOWN | OsAT2       | Transferase family protein                                                                                                   |
| Os01g0654500 | UP   | OsRH25      | Similar to RNA helicase (Fragment)                                                                                           |
| Os01g0661500 | DOWN | WRKY11      | WRKY transcription factor, Control of flowering time and plant heigh                                                         |
| Os01g0675800 | DOWN | Os-CYP72A18 | Cytochrome P450 family protein                                                                                               |
| Os01g0676200 | DOWN | OsFbox031   | Cyclin-like F-box domain containing protein                                                                                  |
| Os01g0678000 | DOWN | -           | Hypothetical conserved gene                                                                                                  |
| Os01g0678100 | DOWN | -           | Transposon, En/Spm-like domain containing protein                                                                            |
| Os01g0681600 | DOWN | -           | Hypothetical protein                                                                                                         |
| Os01g0681800 | DOWN | -           | Similar to NADP-isocitrate dehydrogenase                                                                                     |
| Os01g0686200 | DOWN | -           | Mov34/MPN/PAD-1 family protein                                                                                               |
| Os01g0688200 | UP   | ONAC014     | No apical meristem (NAM) protein domain containing protein                                                                   |
| Os01g0696800 | DOWN | -           | Conserved hypothetical protein                                                                                               |
| Os01g0702000 | DOWN | -           | Protein of unknown function DUF2921 domain containing protein                                                                |
| Os01g0702450 | UP   | -           | Protein of unknown function DUF2921 domain containing protein                                                                |
| Os01g0704100 | DOWN | -           | Hypothetical conserved gene                                                                                                  |
| Os01g0705000 | DOWN | -           | Conserved hypothetical protein                                                                                               |
| Os01g0706400 | DOWN | -           | UDP-glucuronosyl/UDP-glucosyltransferase family protein                                                                      |
| Os01g0706600 | UP   | -           | Similar to hydrolase, alpha/beta fold family protein                                                                         |
| Os01g0708500 | UP   | -           | Peptidase A1 domain containing protein                                                                                       |
| Os01g0711000 | UP   | OsBBD1      | Protein of unknown function DUF151 domain containing protein                                                                 |
| Os01g0714600 | DOWN | -           | Similar to Chaperone protein dnaJ 10                                                                                         |
| Os01g0716500 | UP   | NRT2.3      | Nitrate transporter, Nitrate transporter                                                                                     |
| Os01g0718300 | DOWN | -           | Hypothetical conserved gene                                                                                                  |
| Os01g0719800 | DOWN | -           | Protein of unknown function DUF292, eukaryotic domain containing protein                                                     |
| Os01g0720200 | UP   | -           | Conserved hypothetical protein                                                                                               |
| Os01g0720400 | UP   | LOGL1       | Similar to lysine decarboxylase-like protein                                                                                 |
| Os01g0725000 | DOWN | -           | Similar to Vacuolar ATP synthase subunit B isoform 2 (EC 3.6.3.14) (V-ATPase B subunit 2) (Vacuolar proton pump B subunit 2) |
| Os01g0725800 | DOWN | -           | Similar to cDNA clone:J023088C01, full insert sequence                                                                       |
| Os01g0726400 | DOWN | -           | Methyltransferase type 12 domain containing protein                                                                          |
| Os01g0727800 | DOWN | D61         | Receptor serine/threonine kinase, Organ development through controlling cell division and elongatio                          |
| Os01g0727820 | DOWN | -           | Hypothetical protein                                                                                                         |
| Os01g0727840 | DOWN | -           | Non-protein coding transcript                                                                                                |

|              |      |            |                                                                                                                                 |
|--------------|------|------------|---------------------------------------------------------------------------------------------------------------------------------|
| Os01g0732801 | DOWN | OsACP1     | HAD-superfamily subfamily IB hydrolase, hypothetical 1 protein                                                                  |
| Os01g0733001 | DOWN | -          | Similar to H0402C08.3 protein                                                                                                   |
| Os01g0733200 | DOWN | OsWD40-24  | WD40/YVTN repeat-like domain containing protein                                                                                 |
| Os01g0735900 | UP   | MADS32     | MADS box transcription factor, Regulation of floral organ identity                                                              |
| Os01g0736100 | UP   | OsSub3     | Peptidase S8, subtilisin-related domain containing protein                                                                      |
| Os01g0738800 | UP   | -          | Hypothetical protein                                                                                                            |
| Os01g0740600 | UP   | OsSub3     | Similar to subtilase family protein                                                                                             |
| Os01g0740650 | UP   | -          | Conserved hypothetical protein                                                                                                  |
| Os01g0740700 | UP   | -          | Similar to NRAMP3 (NRAMP metal ion transporter 3); manganese ion transmembrane transporter/ metal ion transmembrane transporter |
| Os01g0749200 | DOWN | OsHsfC1b   | Similar to Heat shock transcription factor 29 (Fragment)                                                                        |
| Os01g0752200 | UP   | OsUGT706B1 | UDP-glucuronosyl/UDP-glucosyltransferase family protein                                                                         |
| Os01g0764400 | UP   | OsUGT706C1 | UDP-glucuronosyl/UDP-glucosyltransferase family protein                                                                         |
| Os01g0767600 | UP   | OsPFK02    | Conserved hypothetical protein                                                                                                  |
| Os01g0768100 | DOWN | -          | Transferrin receptor-like, dimerisation domain containing protein                                                               |
| Os01g0769700 | DOWN | -          | Similar to glutamate carboxypeptidase 2                                                                                         |
| Os01g0770000 | DOWN | -          | Hypothetical protein                                                                                                            |
| Os01g0770200 | DOWN | -          | Hypothetical conserved gene                                                                                                     |
| Os01g0777700 | DOWN | WLP1       | Chloroplast ribosome L13 protein, Chloroplast development under low temperature condition                                       |
| Os01g0781200 | DOWN | OsCesA4    | Similar to Cellulose synthase (Fragment)                                                                                        |
| Os01g0782200 | DOWN | NOG1       | Enoyl-CoA hydratase/isomerase, Regulation of grain number and the yield                                                         |
| Os01g0787600 | UP   | -          | Similar to Dynein light chain                                                                                                   |
| Os01g0788400 | UP   | CM         | Similar to Chorismate mutase, chloroplast precursor (EC 5.4.99.5) (CM-1)                                                        |
| Os01g0788451 | UP   | -          | Conserved hypothetical protein                                                                                                  |
| Os01g0793800 | UP   | -          | Conserved hypothetical protein                                                                                                  |
| Os01g0795600 | DOWN | DRUS2      | Receptor-like kinase, Control of reproductive growth and development, Repression of cell death                                  |
| Os01g0798500 | DOWN | -          | Uncharacterised protein family UPF0089 domain containing protein                                                                |
| Os01g0808100 | DOWN | TYDC       | Aromatic L-amino acid decarboxylase (AADC), Conversion of tyrosine into tyramine                                                |
| Os01g0812900 | UP   | OsCKX5     | Similar to Cytokinin dehydrogenase 5 precursor (EC 1.5.99.12) (Cytokinin oxidase 5) (CKO5) (AtCKX5) (AtCKX6)                    |
| Os01g0813000 | DOWN | -          | Similar to acid phosphatase/ oxidoreductase/ transition metal ion binding                                                       |
| Os01g0813800 | DOWN | Pi64       | Similar to Rust resistance protein                                                                                              |
| Os01g0814800 | DOWN | -          | Diacylglycerol kinase, catalytic region domain containing protein                                                               |
| Os01g0814900 | UP   | OsPOP4     | Similar to Salicylic acid-binding protein 2                                                                                     |
| Os01g0821600 | DOWN | OsPME6     | Similar to Pectinesterase (EC 3.1.1.11) (Fragment)                                                                              |

|              |      |           |                                                                                                                                           |
|--------------|------|-----------|-------------------------------------------------------------------------------------------------------------------------------------------|
| Os01g0824700 | DOWN | -         | Hypothetical protein                                                                                                                      |
| Os01g0825800 | UP   | -         | Di-copper centre-containing domain containing protein                                                                                     |
| Os01g0826400 | DOWN | -         | Conserved hypothetical protein                                                                                                            |
| Os01g0829000 | DOWN | Hwi2      | Similar to Subtilase                                                                                                                      |
| Os01g0829100 | DOWN | -         | Conserved hypothetical protein                                                                                                            |
| Os01g0832600 | UP   | -         | Similar to predicted protein                                                                                                              |
| Os01g0833150 | DOWN | OsZIP08   | Similar to BZIP transcription factor                                                                                                      |
| Os01g0833600 | DOWN | -         | Similar to alphavirus core protein family                                                                                                 |
| Os01g0834100 | UP   | -         | Similar to 14 kDa zinc-binding protein                                                                                                    |
| Os01g0837000 | DOWN | Os1bglu3  | Similar to Beta-glucosidase 3                                                                                                             |
| Os01g0838350 | UP   | -         | Similar to Cysteine synthase, chloroplast precursor (EC 2.5.1.47)                                                                         |
| Os01g0838600 | UP   | NFR       | Similar to Cytochrome b5 reductase                                                                                                        |
| Os01g0839300 | UP   | OsWRKY21  | WRKY transcription factor 48-like protein (WRKY transcription factor 21)                                                                  |
| Os01g0841600 | UP   | OsFbox048 | Cyclin-like F-box domain containing protein                                                                                               |
| Os01g0841700 | DOWN | OsATL7    | Amino acid transporter, transmembrane domain containing protein                                                                           |
| Os01g0841800 | DOWN | OsWRKY24  | WRKY transcription factor 24 (WRKY24)                                                                                                     |
| Os01g0842200 | DOWN | -         | Thioredoxin-like fold domain containing protein                                                                                           |
| Os01g0845000 | DOWN | -         | Ankyrin domain containing protein                                                                                                         |
| Os01g0846000 | DOWN | -         | Similar to Leucoanthocyanidin dioxygenase-like protein                                                                                    |
| Os01g0847700 | UP   | -         | Similar to predicted protein                                                                                                              |
| Os01g0847800 | UP   | -         | Conserved hypothetical protein                                                                                                            |
| Os01g0848900 | UP   | SIP1      | Aldehyde dehydrogenase, conserved site domain containing protein                                                                          |
| Os01g0855200 | UP   | OsNPR4    | Ankyrin repeat containing protein                                                                                                         |
| Os01g0857500 | DOWN | OsIPS2    | Conserved hypothetical protein                                                                                                            |
| Os01g0864500 | DOWN | -         | Zinc finger, C2H2-like domain containing protein                                                                                          |
| Os01g0866400 | DOWN | -         | Similar to 50S ribosomal protein L17                                                                                                      |
| Os01g0871300 | UP   | OscTPI    | Triose phosphate isomerase (EC 5.3.1.1), Abiotic stress response, Response to methylglyoxal (cytotoxin)                                   |
| Os01g0871800 | DOWN | Rpp17     | Similar to Isoform ERG1b of Elicitor-responsive protein 1                                                                                 |
| Os01g0871900 | DOWN | -         | Ribonuclease II and R domain containing protein                                                                                           |
| Os01g0873200 | DOWN | -         | Similar to Scarecrow-like 9 (Fragment)                                                                                                    |
| Os01g0874800 | DOWN | -         | Hypothetical conserved gene                                                                                                               |
| Os01g0881300 | DOWN | -         | Nucleic acid-binding, OB-fold domain containing protein                                                                                   |
| Os01g0881800 | DOWN | AKR2      | Aldo-keto reductase, Detoxification of reactive aldehydes, Abiotic stress tolerance                                                       |
| Os01g0882200 | DOWN | AKR3      | Similar to Aldose reductase (EC 1.1.1.21) (AR) (Aldehyde reductase) (20-alpha-hydroxysteroid dehydrogenase) (EC 1.1.1.149) (20-alpha-HSD) |
| Os01g0883100 | DOWN | -         | Conserved hypothetical protein                                                                                                            |

|              |      |              |                                                                                                                                                                   |
|--------------|------|--------------|-------------------------------------------------------------------------------------------------------------------------------------------------------------------|
| Os01g0885500 | DOWN | -            | Tetratricopeptide-like helical domain containing protein                                                                                                          |
| Os01g0890600 | DOWN | -            | Xanthine/uracil/vitamin C permease family protein                                                                                                                 |
| Os01g0891400 | DOWN | ENAC1        | NAC (NAM ATAF1/2 CUC2) transcription factor, Early and transient regulator of abiotic stress response                                                             |
| Os01g0891601 | DOWN | OsSDS1       | Harpin-induced 1 domain containing protein                                                                                                                        |
| Os01g0891700 | UP   | FR           | Similar to Fructose-1,6-bisphosphatase (EC 3.1.3.11) (Fragment)                                                                                                   |
| Os01g0893700 | UP   | -            | Pyridoxal phosphate-dependent transferase, major region domain containing protein                                                                                 |
| Os01g0901900 | DOWN | -            | TGF-beta receptor, type I/II extracellular region family protein                                                                                                  |
| Os01g0902100 | DOWN | -            | Similar to POT family protein                                                                                                                                     |
| Os01g0905200 | DOWN | -            | Similar to Amidophosphoribosyltransferase, chloroplast precursor (EC 2.4.2.14) (Glutamine phosphoribosylpyrophosphate amidotransferase) (ATASE) (GPAT) (Fragment) |
| Os01g0905300 | DOWN | -            | Similar to DNA polymerase I                                                                                                                                       |
| Os01g0905700 | UP   | -            | Conserved hypothetical protein                                                                                                                                    |
| Os01g0908700 | DOWN | OsSWEET 1a   | Non-protein coding transcript                                                                                                                                     |
| Os01g0909400 | DOWN | -            | Conserved hypothetical protein                                                                                                                                    |
| Os01g0912850 | DOWN | -            | Similar to octopine synthase binding factor3                                                                                                                      |
| Os01g0915900 | DOWN | OsMADS2      | Similar to PISTILLATA-like MADS box protein                                                                                                                       |
| Os01g0916100 | DOWN | -            | Hypothetical conserved gene                                                                                                                                       |
| Os01g0919400 | DOWN | -            | Protein kinase, catalytic domain domain containing protein                                                                                                        |
| Os01g0920300 | DOWN | -            | S1, RNA binding domain containing protein                                                                                                                         |
| Os01g0922700 | UP   | -            | Leucine-rich repeat, N-terminal domain containing protein                                                                                                         |
| Os01g0924200 | UP   | -            | Leucine-rich repeat, N-terminal domain containing protein                                                                                                         |
| Os01g0926300 | UP   | -            | DOMON domain domain containing protein                                                                                                                            |
| Os01g0930000 | DOWN | -            | S1, RNA binding domain containing protein                                                                                                                         |
| Os01g0930400 | UP   | OsABCC2      | Similar to MRP-like ABC transporter                                                                                                                               |
| Os01g0931100 | DOWN | OsEXO70 FX15 | Exo70 exocyst complex subunit family protein                                                                                                                      |
| Os01g0937100 | UP   | OsEXO70 FX14 | Similar to Leucine zipper protein-like                                                                                                                            |
| Os01g0940000 | UP   | -            | Zinc finger, RING/FYVE/PHD-type domain containing protein                                                                                                         |
| Os01g0940800 | UP   | OsRFP        | Similar to Hnrpa2b1-prov protein                                                                                                                                  |
| Os01g0945300 | DOWN | -            | Protein of unknown function DUF868, plant family protein                                                                                                          |
| Os01g0948500 | DOWN | -            | Conserved hypothetical protein                                                                                                                                    |
| Os01g0948600 | UP   | -            | Conserved hypothetical protein                                                                                                                                    |
| Os01g0949300 | DOWN | -            | Similar to loricrin                                                                                                                                               |
| Os01g0949700 | UP   | SPS1         | Sucrose phosphate synthase, Sucrose synthesis in pollen germination                                                                                               |
| Os01g0952500 | UP   | -            | Methyltransferase small domain containing protein                                                                                                                 |
| Os01g0952900 | DOWN | -            | Conserved hypothetical protein                                                                                                                                    |

|              |      |         |                                                                                                          |
|--------------|------|---------|----------------------------------------------------------------------------------------------------------|
| Os01g0959750 | DOWN | -       | Conserved hypothetical protein                                                                           |
| Os01g0960800 | UP   | -       | Similar to Transaldolase (EC 2.2.1.2)                                                                    |
| Os01g0962600 | UP   | -       | Similar to CM0545.330.nc protein                                                                         |
| Os01g0971600 | DOWN | HAK5    | Potassium transporter, High-affinity K acquisition, Root-to-shoot K transport, K-regulated salt toleranc |
| Os01g0975000 | DOWN | -       | Conserved hypothetical protein                                                                           |
| Os01g0975900 | UP   | -       | Similar to Xylanase inhibitor precursor (Xylanase inhibitor TAXI-I)                                      |
| Os01g0977250 | UP   | CKX4    | Cytokinin oxidase/dehydrogenase, Crown root formatio                                                     |
| Os01g0978500 | DOWN | Gns6    | Similar to Beta-1,3-glucanase precursor                                                                  |
| Os02g0101000 | UP   | OsBAT4  | Amino acid/polyamine transporter I family protein                                                        |
| Os02g0101750 | DOWN | -       | Conserved hypothetical protein                                                                           |
| Os02g0107900 | DOWN | -       | Armadillo-like helical domain containing protein                                                         |
| Os02g0109200 | DOWN | -       | Conserved hypothetical protein                                                                           |
| Os02g0109900 | DOWN | -       | EF-Hand type domain containing protein                                                                   |
| Os02g0114033 | DOWN | OsGSTU7 | Glutathione S-transferase, C-terminal domain containing protein                                          |
| Os02g0114200 | UP   | RR4     | A-type response regulator, Cytokinin signalin                                                            |
| Os02g0115900 | UP   | -       | Conserved hypothetical protein                                                                           |
| Os02g0120000 | DOWN | -       | Conserved hypothetical protein                                                                           |
| Os02g0122600 | DOWN | -       | Protein Transporter, Pam16 family protein                                                                |
| Os02g0122900 | DOWN | RPS10   | Similar to 40S ribosomal protein S10-1                                                                   |
| Os02g0134200 | DOWN | OsSTA45 | Similar to Sn-glycerol-3-phosphate dehydrogenase (Fragment)                                              |
| Os02g0137450 | DOWN | OsDSR3  | Protein of unknown function DUF966 family protein                                                        |
| Os02g0138100 | DOWN | OsMYB48 | MYB-related transcription factor, Drought and salinity toleranc                                          |
| Os02g0139400 | DOWN | OsTIP1  | Similar to Tonoplast membrane integral protein ZmTIP1-2                                                  |
| Os02g0141100 | DOWN | -       | Heavy metal transport/detoxification protein domain containing protein                                   |
| Os02g0145200 | UP   | -       | Hypothetical gene                                                                                        |
| Os02g0150600 | DOWN | -       | Conserved hypothetical protein                                                                           |
| Os02g0152900 | DOWN | OsATL11 | Amino acid transporter, transmembrane domain containing protein                                          |
| Os02g0153200 | UP   | -       | Hypothetical gene                                                                                        |
| Os02g0154000 | DOWN | -       | Similar to ABC transporter family, cholesterol/phospholipid flippase                                     |
| Os02g0154200 | DOWN | -       | Protein of unknown function DUF793 family protein                                                        |
| Os02g0161100 | DOWN | -       | Hypothetical conserved gene                                                                              |
| Os02g0161200 | DOWN | -       | Glutamine-Leucine-Glutamine, QLQ domain containing protein                                               |
| Os02g0161300 | DOWN | CBP3    | Serine carboxypeptidase III precursor (EC 3.4.16.5)                                                      |
| Os02g0162600 | DOWN | OsBiP1  | Endosperm lumenal binding protein                                                                        |
| Os02g0164800 | UP   | -       | Pentatricopeptide repeat domain containing protein                                                       |
| Os02g0165100 | DOWN | -       | EF-Hand type domain containing protein                                                                   |
| Os02g0165200 | DOWN | -       | Similar to Dimethyladenosine transferase                                                                 |
| Os02g0168200 | UP   | CDPK4   | Calcium-dependent protein kinase, Positive regulator of the salt and drought stress response             |
| Os02g0173100 | DOWN | OsSGL   | DUF1645 family protein, Regulation of stress-tolerance and grain lengt                                   |

|              |      |                |                                                                                                                    |
|--------------|------|----------------|--------------------------------------------------------------------------------------------------------------------|
| Os02g0174300 | DOWN | OsHAC70<br>3   | Conserved hypothetical protein                                                                                     |
| Os02g0181300 | DOWN | -              | Conserved hypothetical protein                                                                                     |
| Os02g0184300 | DOWN | OsSPL3         | Similar to Squamosa promoter-binding-like protein 3                                                                |
| Os02g0184900 | UP   | OsARF5         | Similar to Auxin response factor 5                                                                                 |
| Os02g0190300 | UP   | -              | Conserved hypothetical protein                                                                                     |
| Os02g0193732 | UP   | -              | Similar to Pyridine nucleotide-disulphide oxidoreductase (Fragment)                                                |
| Os02g0198500 | UP   | YL1            | Nucleus-encoded chloroplast protein, Chloroplast development, Biogenesis of chloroplast ATP synthas                |
| Os02g0198700 | DOWN | LRK7           | Leucine-rich repeat receptor-like kinas                                                                            |
| Os02g0199200 | DOWN | LRK2           | Leucine-rich repeat receptor-like kinase, Positive regulation of the drought stress response and tiller developmen |
| Os02g0199300 | DOWN | LRK1           | Leucine-rich repeat receptor kinase, Regulation of grain yiel                                                      |
| Os02g0203300 | UP   | OsFH10         | Actin-binding FH2 domain containing protein                                                                        |
| Os02g0205100 | UP   | OsC3H13        | Zinc finger, CCCH-type domain containing protein                                                                   |
| Os02g0206700 | UP   | -              | Similar to Mot1 (Fragment)                                                                                         |
| Os02g0209300 | DOWN | -              | Conserved hypothetical protein                                                                                     |
| Os02g0209900 | UP   | -              | Zinc finger, C2H2-type domain containing protein                                                                   |
| Os02g0211000 | DOWN | OsRLCK6<br>3   | Protein kinase, core domain containing protein                                                                     |
| Os02g0211350 | UP   | -              | Hypothetical protein                                                                                               |
| Os02g0211500 | DOWN | -              | Similar to Transfactor-like protein                                                                                |
| Os02g0212400 | UP   | CYP97B4        | Similar to cytochrome P450                                                                                         |
| Os02g0212900 | DOWN | -              | Hypothetical conserved gene                                                                                        |
| Os02g0215200 | UP   | 4CL3           | 4-coumarate:coenzyme A ligase, Lignin biosynthesis, Defense against woundin                                        |
| Os02g0215700 | DOWN | WRKY71         | WRKY transcription factor, Defense respons                                                                         |
| Os02g0216400 | DOWN | -              | Hypothetical protein                                                                                               |
| Os02g0221900 | UP   | -              | Cytochrome P450 family protein                                                                                     |
| Os02g0224800 | UP   | GH2            | Cinnamyl-alcohol dehydrogenase, Lignin biosynthesis, Monolignol biosyn-<br>thesi                                   |
| Os02g0227200 | UP   | OsABCB9        | P-glycoprotein homologue                                                                                           |
| Os02g0227900 | UP   | -              | Hypothetical conserved gene                                                                                        |
| Os02g0234500 | DOWN | -              | Conserved hypothetical protein                                                                                     |
| Os02g0240100 | UP   | OsSub12        | Similar to Subtilisin-like protease                                                                                |
| Os02g0241200 | DOWN | -              | Disease resistance protein domain containing protein                                                               |
| Os02g0241300 | UP   | OsFKBP16<br>-1 | Peptidyl-prolyl cis-trans isomerase, FKBP-type domain containing protein                                           |
| Os02g0244700 | UP   | -              | Similar to UDP-glycosyltransferase UGT75E3                                                                         |
| Os02g0247800 | DOWN | -              | Conserved hypothetical protein                                                                                     |
| Os02g0251800 | DOWN | -              | UDP-glucuronosyl/UDP-glucosyltransferase family protein                                                            |

|              |      |           |                                                                                     |
|--------------|------|-----------|-------------------------------------------------------------------------------------|
| Os02g0251900 | DOWN | -         | Hypothetical conserved gene                                                         |
| Os02g0255700 | DOWN | -         | Syntaxin, N-terminal domain containing protein                                      |
| Os02g0255801 | DOWN | OsABCA1   | Conserved hypothetical protein                                                      |
| Os02g0259600 | DOWN | -         | Hypothetical gene                                                                   |
| Os02g0260500 | DOWN | -         | Non-protein coding transcript                                                       |
| Os02g0261100 | UP   | -         | Conserved hypothetical protein                                                      |
| Os02g0269200 | DOWN | OsRLCK66  | Similar to Protein kinase domain containing protein, expressed                      |
| Os02g0271000 | DOWN | HDAC2     | Class-I type histone deacetylase, Vegetative growt                                  |
| Os02g0273000 | UP   | -         | Protein kinase, catalytic domain domain containing protein                          |
| Os02g0273800 | DOWN | -         | Conserved hypothetical protein                                                      |
| Os02g0273900 | DOWN | Os1900    | Cytochrome P450 family member, Homolog of Arabidopsis MORE AXIL-LARY GROWTH 1 (MAX1 |
| Os02g0277700 | DOWN | -         | Ndr family protein                                                                  |
| Os02g0281000 | DOWN | OSENOD93B | Early nodulin                                                                       |
| Os02g0282500 | DOWN | OsRLCK70  | Leucine-rich repeat domain containing protein                                       |
| Os02g0286933 | DOWN | -         | NAD(P)-binding domain containing protein                                            |
| Os02g0287900 | UP   | prx30     | Similar to Peroxidase 2 (Fragment)                                                  |
| Os02g0288400 | UP   | -         | Myb-like DNA-binding domain, SHAQKYF class domain containing protein                |
| Os02g0289700 | UP   | -         | Conserved hypothetical protein                                                      |
| Os02g0306401 | DOWN | PEPC-1    | Similar to Phosphoenolpyruvate carboxylase 1 (EC 4.1.1.31) (PEPCase 1) (CP21)       |
| Os02g0318100 | UP   | OsEFCAX2  | Similar to calcium ion binding protein                                              |
| Os02g0320300 | DOWN | OsVQ6     | VQ domain containing protein                                                        |
| Os02g0323600 | UP   | OsVQ7     | Similar to Tobacco rattle virus-induced protein variant 2                           |
| Os02g0326700 | DOWN | FLL1      | Conserved hypothetical protein                                                      |
| Os02g0332450 | UP   | -         | Non-protein coding transcript                                                       |
| Os02g0332700 | DOWN | OsRPL21   | Similar to 50S ribosomal protein L21, chloroplast precursor (CL21) (CS-L7)          |
| Os02g0433900 | UP   | SIP7      | Hypothetical conserved gene                                                         |
| Os02g0453500 | DOWN | UBC5B     | Ubiquitin-conjugating enzyme E2, Elicitor-induced defense respons                   |
| Os02g0460200 | DOWN | -         | Dynein light chain, type 1 family protein                                           |
| Os02g0462401 | DOWN | OsSub17   | Similar to Subtilase                                                                |
| Os02g0467200 | UP   | -         | Similar to Uridine kinase-like protein                                              |
| Os02g0467300 | UP   | -         | Multi antimicrobial extrusion protein MatE domain containing protein                |
| Os02g0467400 | UP   | -         | Conserved hypothetical protein                                                      |
| Os02g0470000 | DOWN | -         | Leucine-rich repeat domain containing protein                                       |
| Os02g0471100 | UP   | OsPP23    | RmlC-like jelly roll fold domain containing protein                                 |
| Os02g0474000 | DOWN | -         | Disease resistance protein domain containing protein                                |

|              |      |            |                                                                                |
|--------------|------|------------|--------------------------------------------------------------------------------|
| Os02g0486500 | DOWN | -          | Conserved hypothetical protein                                                 |
| Os02g0493300 | DOWN | OsFbox080  | Cyclin-like F-box domain containing protein                                    |
| Os02g0494400 | DOWN | OsABCC5    | Similar to MRP-like ABC transporter                                            |
| Os02g0496900 | UP   | -          | Hypothetical protein                                                           |
| Os02g0498666 | DOWN | OsNAAT1    | Similar to Nicotianamine aminotransferase A                                    |
| Os02g0503800 | UP   | -          | Similar to Alternative oxidase                                                 |
| Os02g0503850 | UP   | -          | Similar to Chalcone isomerase 3                                                |
| Os02g0505700 | DOWN | Os-CYP51H4 | Similar to Cytochrome P450-like protein                                        |
| Os02g0508000 | UP   | OsRhmbd6   | Peptidase S54, rhomboid domain containing protein                              |
| Os02g0508650 | UP   | -          | Hypothetical conserved gene                                                    |
| Os02g0510600 | DOWN | -          | Conserved hypothetical protein                                                 |
| Os02g0513800 | DOWN | -          | Conserved hypothetical protein                                                 |
| Os02g0527900 | UP   | -          | Similar to mitochondrial glycoprotein                                          |
| Os02g0528900 | UP   | -          | Similar to OSIGBa0131F24.5 protein                                             |
| Os02g0530300 | UP   | -          | Conserved hypothetical protein                                                 |
| Os02g0532300 | UP   | -          | Hypothetical protein                                                           |
| Os02g0534400 | UP   | -          | Conserved hypothetical protein                                                 |
| Os02g0536300 | DOWN | -          | Hypothetical protein                                                           |
| Os02g0536500 | UP   | -          | Pentatricopeptide repeat domain containing protein                             |
| Os02g0539200 | DOWN | -          | Conserved hypothetical protein                                                 |
| Os02g0540700 | DOWN | OsFbox088  | F-box associated interaction domain domain containing protein                  |
| Os02g0557800 | UP   | -          | Hypothetical conserved gene                                                    |
| Os02g0566300 | DOWN | -          | Tetratricopeptide-like helical domain containing protein                       |
| Os02g0567800 | UP   | -          | Similar to TPR Domain containing protein, expressed                            |
| Os02g0568700 | UP   | -          | Mitochondrial import receptor, TOM9-2 subunit, plant domain containing protein |
| Os02g0570400 | DOWN | -          | Non-protein coding transcript                                                  |
| Os02g0571800 | UP   | -          | Cytochrome P450 domain containing protein                                      |
| Os02g0571900 | UP   | -          | Similar to Cytochrome P450 CYP81L6                                             |
| Os02g0572050 | UP   | -          | Hypothetical protein                                                           |
| Os02g0573500 | DOWN | -          | Trimeric LpxA-like domain containing protein                                   |
| Os02g0579600 | UP   | -          | Non-protein coding transcript                                                  |
| Os02g0579800 | DOWN | -          | Heavy metal transport/detoxification protein domain containing protein         |
| Os02g0581400 | DOWN | -          | Ovarian tumour, otubain domain containing protein                              |
| Os02g0581500 | DOWN | -          | Hypothetical conserved gene                                                    |
| Os02g0584700 | DOWN | ABCG41     | Similar to PDR-like ABC transporter                                            |
| Os02g0584800 | DOWN | OsSAP5     | Zinc finger, AN1-type domain containing protein                                |

|              |      |           |                                                                                |
|--------------|------|-----------|--------------------------------------------------------------------------------|
| Os02g0585200 | DOWN | -         | Hypothetical conserved gene                                                    |
| Os02g0588500 | DOWN | OSCIN1    | Cell wall invertase (EC 3.2.1.26)                                              |
| Os02g0594900 | DOWN | OsFbox093 | Leucine-rich repeat 2 domain containing protein                                |
| Os02g0596700 | UP   | -         | Similar to H0622F05.5 protein                                                  |
| Os02g0597200 | DOWN | OsPUB33   | Zinc finger, RING/FYVE/PHD-type domain containing protein                      |
| Os02g0601300 | UP   | OsPUB45   | Similar to Arm repeat-containing protein                                       |
| Os02g0602400 | DOWN | OsZFP6    | Conserved hypothetical protein                                                 |
| Os02g0606600 | UP   | -         | Protein kinase, catalytic domain domain containing protein                     |
| Os02g0608700 | UP   | OSRR2     | A-type response regulator, Cytokinin signalin                                  |
| Os02g0609900 | DOWN | -         | Conserved hypothetical protein                                                 |
| Os02g0611800 | UP   | -         | Alpha/beta hydrolase fold-3 domain containing protein                          |
| Os02g0613900 | UP   | OsTPS5    | Terpene synthase-like domain containing protein                                |
| Os02g0614200 | UP   | OsKS7     | Similar to Ent-kaurene synthase 1A                                             |
| Os02g0615400 | UP   | OsKS6     | Terpene synthase-like domain containing protein                                |
| Os02g0616600 | UP   | CYP76M6   | Cytochrome P450 family protein                                                 |
| Os02g0617600 | DOWN | -         | Similar to Ent-cassa-12,15-diene synthase                                      |
| Os02g0618000 | UP   | -         | Similar to Monosaccharide transporter 1                                        |
| Os02g0620200 | UP   | Os-MADS27 | Transcription factor MADS27                                                    |
| Os02g0621300 | UP   | OsFWL2    | Similar to Fw2.2                                                               |
| Os02g0621800 | UP   | -         | Conserved hypothetical protein                                                 |
| Os02g0624300 | DOWN | -         | Alpha/beta hydrolase fold-1 domain containing protein                          |
| Os02g0631601 | DOWN | -         | Heavy metal transport/detoxification protein domain containing protein         |
| Os02g0632900 | DOWN | -         | Heavy metal transport/detoxification protein domain containing protein         |
| Os02g0633066 | DOWN | -         | Heavy metal transport/detoxification protein domain containing protein         |
| Os02g0635200 | UP   | -         | Hypothetical conserved gene                                                    |
| Os02g0642200 | UP   | -         | Glycosyl transferase, family 17 protein                                        |
| Os02g0649800 | UP   | -         | Similar to protein binding protein                                             |
| Os02g0650900 | UP   | -         | Conserved hypothetical protein                                                 |
| Os02g0654700 | DOWN | OsGapC1   | Similar to Glyceraldehyde-3-phosphate dehydrogenase, cytosolic 3 (EC 1.2.1.12) |
| Os02g0661100 | DOWN | -         | Mitochondrial transcription termination factor-related family protein          |
| Os02g0664100 | DOWN | OsCML17   | Hypothetical conserved gene                                                    |
| Os02g0666250 | UP   | -         | Similar to predicted protein                                                   |
| Os02g0669700 | UP   | -         | Leucine-rich repeat, N-terminal domain containing protein                      |
| Os02g0678200 | DOWN | OsHCT2    | Similar to Hydroxyanthranilate hydroxycinnamoyltransferase 3                   |
| Os02g0681632 | DOWN | -         | Similar to Adenine phosphoribosyltransferase 2 (EC 2.4.2.7) (APRT)             |
| Os02g0682600 | UP   | -         | Conserved hypothetical protein                                                 |
| Os02g0684000 | UP   | -         | Leucine-rich repeat domain containing protein                                  |
| Os02g0687200 | DOWN | -         | Hypothetical protein                                                           |

|              |      |            |                                                                                                                                     |
|--------------|------|------------|-------------------------------------------------------------------------------------------------------------------------------------|
| Os02g0691500 | UP   | -          | Protein phosphatase 2A, regulatory subunit PR55 domain containing protein                                                           |
| Os02g0694800 | DOWN | -          | Non-protein coding transcript                                                                                                       |
| Os02g0696700 | UP   | -          | Conserved hypothetical protein                                                                                                      |
| Os02g0698000 | DOWN | OsCER1     | Homologous protein of CER1, Very-long-chain (VLC) alkane biosynthesis, Regulation of anther development and plastids differentiatio |
| Os02g0703600 | DOWN | HWH1       | Glucose-methanol-choline (GMC) oxidoreductase family protein, Hybrid breakdown (HB                                                  |
| Os02g0710102 | DOWN | OsMYB30    | R2R3-type MYB transcription factor, Negative regulation of cold tolerance, Maintenance of Pi homeostasi                             |
| Os02g0710900 | UP   | -          | Similar to predicted protein                                                                                                        |
| Os02g0724500 | DOWN | OsWAK15    | Conserved hypothetical protein                                                                                                      |
| Os02g0725200 | DOWN | OsWAK16    | Protein kinase, catalytic domain domain containing protein                                                                          |
| Os02g0727100 | DOWN | NIT1       | Similar to Nitrilase 2 (EC 3.5.5.1)                                                                                                 |
| Os02g0727300 | DOWN | OsREM1.4   | Similar to Remorin                                                                                                                  |
| Os02g0728500 | DOWN | OsALDH3 E2 | Similar to Fatty aldehyde dehydrogenase 1                                                                                           |
| Os02g0730000 | UP   | -          | Similar to Cytochrome B5 homolog (Fragment)                                                                                         |
| Os02g0731400 | DOWN | OsGDH3     | Similar to Glutamate dehydrogenase 2 (EC 1.4.1.3) (GDH 2)                                                                           |
| Os02g0731500 | DOWN | ERF91      | AP2/ERF family protein, Abiotic stress respons                                                                                      |
| Os02g0734300 | DOWN | OsTPP1     | Similar to Trehalose-6-phosphate phosphatase                                                                                        |
| Os02g0735800 | DOWN | -          | Hypothetical conserved gene                                                                                                         |
| Os02g0736400 | UP   | -          | Hypothetical gene                                                                                                                   |
| Os02g0736900 | DOWN | -          | Nucleotide-binding, alpha-beta plait domain containing protein                                                                      |
| Os02g0737200 | DOWN | OsSPX-MFS2 | SPX-MFS protein, Pi homeostasi                                                                                                      |
| Os02g0738100 | DOWN | OsRLCK8 3  | Peptidoglycan-binding Lysin subgroup domain containing protein                                                                      |
| Os02g0739000 | DOWN | -          | Zinc finger, Tim10/DDP-type family protein                                                                                          |
| Os02g0739100 | DOWN | -          | Tetratricopeptide-like helical domain containing protein                                                                            |
| Os02g0740500 | UP   | -          | Protein of unknown function DUF581 family protein                                                                                   |
| Os02g0741500 | DOWN | OsBHLH0 49 | Similar to OSIGBa0142I02-OSIGBa0101B20.1 protein                                                                                    |
| Os02g0741700 | UP   | -          | Similar to ATP binding / protein kinase                                                                                             |
| Os02g0744000 | DOWN | JMJ707     | Transcription factor jumonji/aspartyl beta-hydroxylase domain containing protein                                                    |
| Os02g0748800 | DOWN | OsPrk      | Similar to Phosphoribulokinase, chloroplast precursor (EC 2.7.1.19) (Phospho-pentokinase) (PRKase) (PRK)                            |
| Os02g0753300 | UP   | OsABA8O X1 | Similar to Absciscic acid 8'-hydroxylase 1                                                                                          |
| Os02g0754300 | DOWN | -          | Hypothetical conserved gene                                                                                                         |
| Os02g0755900 | UP   | -          | Heat shock protein Hsp70 family protein                                                                                             |

|              |      |           |                                                                                                                                         |
|--------------|------|-----------|-----------------------------------------------------------------------------------------------------------------------------------------|
| Os02g0757100 | DOWN | -         | Concanavalin A-like lectin/glucanase domain containing protein                                                                          |
| Os02g0759400 | DOWN | OsSTA72   | Similar to transporter-related                                                                                                          |
| Os02g0759900 | DOWN | OsSET12   | SET domain containing protein                                                                                                           |
| Os02g0761200 | UP   | OsATL3    | Amino acid transporter, transmembrane domain containing protein                                                                         |
| Os02g0769800 | DOWN | OsPUB21   | Similar to Beta-catenin repeat family protein                                                                                           |
| Os02g0773800 | UP   | OsSERL3   | Similar to BRASSINOSTEROID INSENSITIVE 1-associated receptor kinase 1                                                                   |
| Os02g0774300 | UP   | OsALDH2a  | Similar to Mitochondrial aldehyde dehydrogenase                                                                                         |
| Os02g0777400 | DOWN | OsUCL5    | Similar to Chemocyanin precursor (Basic blue protein) (Plantacyanin)                                                                    |
| Os02g0781900 | UP   | -         | Similar to cDNA, clone: J065098J18, full insert sequence                                                                                |
| Os02g0783625 | UP   | -         | Similar to Nudix hydrolase 18, mitochondrial precursor (EC 3.6.1.-) (AtNUDT18)                                                          |
| Os02g0790500 | DOWN | -         | Pentatricopeptide repeat domain containing protein                                                                                      |
| Os02g0791500 | DOWN | OsDHODH1  | Aldolase-type TIM barrel domain containing protein                                                                                      |
| Os02g0794400 | DOWN | -         | Conserved hypothetical protein                                                                                                          |
| Os02g0794600 | UP   | -         | Conserved hypothetical protein                                                                                                          |
| Os02g0798200 | UP   | -         | Conserved hypothetical protein                                                                                                          |
| Os02g0802500 | UP   | -         | DEAD-like helicase, N-terminal domain containing protein                                                                                |
| Os02g0805800 | DOWN | OsFH16    | Similar to Formin-like protein 16                                                                                                       |
| Os02g0806350 | DOWN | -         | Conserved hypothetical protein                                                                                                          |
| Os02g0807000 | DOWN | -         | Ribbon-helix-helix domain containing protein                                                                                            |
| Os02g0807100 | DOWN | -         | Conserved hypothetical protein                                                                                                          |
| Os02g0807900 | DOWN | -         | Similar to NDF6 (NDH DEPENDENT FLOW 6)                                                                                                  |
| Os02g0811800 | UP   | OsFbox109 | Similar to VMP3 protein                                                                                                                 |
| Os02g0813083 | UP   | OsGRL4    | Thioredoxin fold domain containing protein                                                                                              |
| Os02g0813166 | UP   | -         | Lipoxygenase, LH2 domain containing protein                                                                                             |
| Os02g0817900 | DOWN | -         | Ribosomal protein L29 family protein                                                                                                    |
| Os02g0821400 | DOWN | -         | UDP-glucuronosyl/UDP-glucosyltransferase domain containing protein                                                                      |
| Os02g0824000 | DOWN | OsPHI-1   | Similar to Phi-1 protein                                                                                                                |
| Os02g0824700 | UP   | OsRING-1  | Zinc finger, RING/FYVE/PHD-type domain containing protein                                                                               |
| Os02g0827600 | DOWN | -         | Similar to threonine endopeptidase                                                                                                      |
| Os02g0828500 | UP   | -         | Armadillo-like helical domain containing protein                                                                                        |
| Os02g0828900 | DOWN | -         | Similar to Mitogen-activated protein kinase kinase kinase 1 (EC 2.7.1.-) (Arabidopsis NPK1-related protein kinase 1). Splice isoform 1S |
| Os02g0830801 | DOWN | -         | Conserved hypothetical protein                                                                                                          |
| Os02g0832400 | DOWN | OsISC23   | Similar to Heat shock 70 kDa protein, mitochondrial precursor                                                                           |
| Os02g0833100 | DOWN | OsRLCK85  | Similar to ER (ERECTA); transmembrane receptor protein kinase                                                                           |
| Os03g0102000 | UP   | OsSTA81   | Conserved hypothetical protein                                                                                                          |

|              |      |               |                                                                                                                                          |
|--------------|------|---------------|------------------------------------------------------------------------------------------------------------------------------------------|
| Os03g0105600 | UP   | -             | Similar to Lysine ketoglutarate reductase/saccharopine dehydrogenase                                                                     |
| Os03g0106000 | DOWN | OsTPS5        | Hypothetical protein                                                                                                                     |
| Os03g0108600 | DOWN | OsUGlcA<br>E3 | Similar to Nucleotide sugar epimerase-like protein (UDP-D-glucuronate 4-epimerase) (EC 5.1.3.6)                                          |
| Os03g0109300 | UP   | -             | Similar to Translation initiation factor IF-3 (Fragment)                                                                                 |
| Os03g0111200 | DOWN | -             | Similar to Copper chaperone COX17-1                                                                                                      |
| Os03g0111400 | UP   | -             | Zinc finger, RING/FYVE/PHD-type domain containing protein                                                                                |
| Os03g0112600 | DOWN | -             | Similar to H(+)-translocating (Pyrophosphate-ENERGIZED) inorganic pyrophosphatase beta-1 polypeptide (EC 3.6.1.1) (Fragment)             |
| Os03g0113500 | DOWN | -             | Aminoglycoside phosphotransferase domain containing protein                                                                              |
| Os03g0115300 | DOWN | -             | Hypothetical protein                                                                                                                     |
| Os03g0115800 | DOWN | OsPPCK1       | Similar to Phosphoenolpyruvate carboxylase kinase 1                                                                                      |
| Os03g0118450 | UP   | -             | Similar to Starch synthase V                                                                                                             |
| Os03g0118600 | DOWN | OsWAK21       | Conserved hypothetical protein                                                                                                           |
| Os03g0121700 | DOWN | OsCCR10       | Similar to Cinnamoyl-CoA reductase (EC 1.2.1.44)                                                                                         |
| Os03g0122200 | DOWN | OsFbox11<br>8 | Conserved hypothetical protein                                                                                                           |
| Os03g0123500 | UP   | OsFbox11<br>9 | Cyclin-like F-box domain containing protein                                                                                              |
| Os03g0126000 | UP   | -             | Armadillo-type fold domain containing protein                                                                                            |
| Os03g0126700 | UP   | CYP97A4       | Cytochrome P450 family protein                                                                                                           |
| Os03g0128200 | DOWN | OsRLCK9<br>0  | Protein kinase, core domain containing protein                                                                                           |
| Os03g0130300 | UP   | -             | Hypothetical conserved gene                                                                                                              |
| Os03g0130900 | DOWN | -             | Similar to Vacuolar ATP synthase subunit F (EC 3.6.3.14) (V-ATPase F subunit) (Vacuolar proton pump F subunit) (V-ATPase 14 kDa subunit) |
| Os03g0132900 | DOWN | -             | Protein of unknown function DUF3531 domain containing protein                                                                            |
| Os03g0133000 | DOWN | -             | Tetratricopeptide-like helical domain containing protein                                                                                 |
| Os03g0133300 | DOWN | JMJ720        | Transcription factor jumonji domain containing protein                                                                                   |
| Os03g0135300 | DOWN | -             | Similar to binding                                                                                                                       |
| Os03g0136900 | UP   | OsGSL7        | Similar to Callose synthase 1 catalytic subunit                                                                                          |
| Os03g0138900 | DOWN | OsFRDL3       | Similar to antiporter/ drug transporter                                                                                                  |
| Os03g0140700 | DOWN | -             | Conserved hypothetical protein                                                                                                           |
| Os03g0141200 | DOWN | OsTUB2        | Tubulin beta-1 chain (Beta-1 tubulin)                                                                                                    |
| Os03g0146200 | UP   | -             | Uncharacterised protein family UPF0187 domain containing protein                                                                         |
| Os03g0148400 | DOWN | OsRH50        | Similar to DEAD-box ATP-dependent RNA helicase 50                                                                                        |
| Os03g0150600 | DOWN | LOGL3         | Similar to Lysine decarboxylase-like protein                                                                                             |
| Os03g0152700 | DOWN | OsREM1.3      | Similar to Remorin                                                                                                                       |
| Os03g0153100 | UP   | -             | Heavy metal transport/detoxification protein domain containing protein                                                                   |
| Os03g0159100 | UP   | -             | Similar to Plus-3 domain containing protein, expressed                                                                                   |
| Os03g0169600 | UP   | -             | Conserved hypothetical protein                                                                                                           |

|              |      |           |                                                                                                                                                    |
|--------------|------|-----------|----------------------------------------------------------------------------------------------------------------------------------------------------|
| Os03g0170100 | DOWN | -         | Pentatricopeptide repeat domain containing protein                                                                                                 |
| Os03g0178200 | DOWN | -         | Conserved hypothetical protein                                                                                                                     |
| Os03g0179950 | UP   | -         | Non-protein coding transcript                                                                                                                      |
| Os03g0181800 | DOWN | -         | Similar to Dihydrodipicolinate reductase-like protein                                                                                              |
| Os03g0184300 | UP   | -         | Similar to Nascent polypeptide-associated complex alpha subunit-like protein 3 (NAC-alpha-like protein 3) (Alpha-NAC-like protein 3)               |
| Os03g0187550 | DOWN | -         | Similar to 50S ribosomal protein L11                                                                                                               |
| Os03g0188100 | UP   | HB365     | Similar to HOS66 protein                                                                                                                           |
| Os03g0188500 | DOWN | -         | Similar to Phosphorybosyl anthranilate transferase 1                                                                                               |
| Os03g0189100 | DOWN | -         | Similar to Barley stem rust resistance protein                                                                                                     |
| Os03g0190400 | DOWN | OsGSL10   | Similar to predicted protein                                                                                                                       |
| Os03g0198300 | DOWN | DEFL8     | Similar to Cp-thionin                                                                                                                              |
| Os03g0207400 | DOWN | OsRLCK96  | Serine/threonine protein kinase domain containing protein                                                                                          |
| Os03g0213100 | UP   | Cht11     | Similar to Chitinase 11                                                                                                                            |
| Os03g0218300 | DOWN | NAC22     | NAC transcription factor, Drought and salt stress tolerance, Modulation of ABA-mediated pathwa                                                     |
| Os03g0221200 | UP   | -         | Similar to F7F22.5                                                                                                                                 |
| Os03g0221800 | DOWN | OsGSTF3   | Similar to Glutathione S-transferase GST 10 (EC 2.5.1.18)                                                                                          |
| Os03g0225900 | DOWN | -         | Similar to Aconitate hydratase, cytoplasmic (EC 4.2.1.3) (Citrate hydro-lyase) (Aconitase)                                                         |
| Os03g0226200 | UP   | -         | Conserved hypothetical protein                                                                                                                     |
| Os03g0231800 | UP   | -         | Tetratricopeptide-like helical domain containing protein                                                                                           |
| Os03g0232400 | DOWN | OsBamy2   | Similar to Beta-amylase PCT-BMYI (EC 3.2.1.2)                                                                                                      |
| Os03g0233900 | UP   | -         | Conserved hypothetical protein                                                                                                                     |
| Os03g0234500 | DOWN | -         | Protein of unknown function DUF740 family protein                                                                                                  |
| Os03g0235700 | UP   | PT1       | Pi transporter, Pi homeostasi                                                                                                                      |
| Os03g0242300 | UP   | -         | Pseudouridine synthase domain containing protein                                                                                                   |
| Os03g0243100 | UP   | -         | Similar to FAD binding domain containing protein, expressed                                                                                        |
| Os03g0249100 | DOWN | -         | Phosphoserine aminotransferase, chloroplast precursor (EC 2.6.1.52) (PSAT)                                                                         |
| Os03g0254000 | DOWN | OsRLCK101 | Similar to Protein kinase APK1B, chloroplast precursor (EC 2.7.1.-)                                                                                |
| Os03g0254200 | DOWN | RDD4      | Dof (DNA binding with one finger) transcription factor, Regulation of Flowering time, Brassinosteroid (BR) signaling to modulate plant architectur |
| Os03g0254800 | UP   | -         | Conserved hypothetical protein                                                                                                                     |
| Os03g0255100 | UP   | -         | Protein of unknown function YGGT family protein                                                                                                    |
| Os03g0257600 | UP   | -         | Non-protein coding transcript                                                                                                                      |
| Os03g0259600 | DOWN | -         | Protein of unknown function DUF936, plant family protein                                                                                           |
| Os03g0261100 | UP   | -         | Conserved hypothetical protein                                                                                                                     |
| Os03g0265400 | DOWN | -         | Hypothetical gene                                                                                                                                  |
| Os03g0265800 | UP   | OsMATE1   | Similar to transparent testa 12 protein                                                                                                            |

|              |      |          |                                                                                                                                                               |
|--------------|------|----------|---------------------------------------------------------------------------------------------------------------------------------------------------------------|
| Os03g0271100 | DOWN | OsAGP3   | Glutelin family protein                                                                                                                                       |
| Os03g0271400 | DOWN | -        | Uncharacterised protein family UPF0503 domain containing protein                                                                                              |
| Os03g0271500 | DOWN | -        | Hypothetical gene                                                                                                                                             |
| Os03g0272400 | DOWN | OsDjC25  | Heat shock protein DnaJ, N-terminal domain containing protein                                                                                                 |
| Os03g0272900 | DOWN | OsPP2C29 | Similar to Protein phosphatase 2C-like                                                                                                                        |
| Os03g0275300 | DOWN | -        | Similar to Sec61p                                                                                                                                             |
| Os03g0275450 | DOWN | -        | Conserved hypothetical protein                                                                                                                                |
| Os03g0277700 | UP   | -        | Similar to Homocysteine S-methyltransferase 1 (EC 2.1.1.10) (S- methylmethionine:homocysteine methyltransferase 1) (SMM:Hcy S- methyltransferase 1) (ZmHMT-1) |
| Os03g0279200 | DOWN | -        | Similar to Leucine Rich Repeat family protein, expressed                                                                                                      |
| Os03g0284500 | DOWN | -        | Cytochrome P450 family protein                                                                                                                                |
| Os03g0285800 | DOWN | AOS2     | Allene oxide synthase (CYP74A2), Biosynthesis of jasmonic acid (JA                                                                                            |
| Os03g0289400 | UP   | HB2      | Non-symbiotic hemoglobin 2 (rHb2                                                                                                                              |
| Os03g0294100 | UP   | -        | Similar to Squalene monooxygenase 1 (EC 1.14.99.7)                                                                                                            |
| Os03g0298300 | DOWN | -        | Phytosulfokine family protein                                                                                                                                 |
| Os03g0301200 | DOWN | HB1      | Non-symbiotic hemoglobin 1 (rHb1                                                                                                                              |
| Os03g0302200 | DOWN | prx37    | Haem peroxidase, plant/fungal/bacterial family protein                                                                                                        |
| Os03g0309800 | DOWN | poxN     | Similar to Peroxidase                                                                                                                                         |
| Os03g0310800 | DOWN | -        | Similar to Peptide transporter 1                                                                                                                              |
| Os03g0319400 | DOWN | -        | Hypothetical protein                                                                                                                                          |
| Os03g0321700 | UP   | OsADF5   | Similar to Actin-depolymerizing factor 5 (ADF-5) (AtADF5)                                                                                                     |
| Os03g0324600 | DOWN | -        | Conserved hypothetical protein                                                                                                                                |
| Os03g0327800 | DOWN | -        | NB-ARC domain containing protein                                                                                                                              |
| Os03g0341100 | UP   | -        | Similar to predicted protein                                                                                                                                  |
| Os03g0341300 | UP   | CS       | Similar to Chorismate synthase 1, chloroplast precursor (EC 4.2.3.5) (5-enolpyruvylshikimate-3-phosphate phospholyase 1)                                      |
| Os03g0348200 | UP   | OsBgal8  | Similar to Relative to SR12 protein (Fragment)                                                                                                                |
| Os03g0351300 | DOWN | -        | Hypothetical conserved gene                                                                                                                                   |
| Os03g0352450 | DOWN | -        | Ubiquitin domain containing protein                                                                                                                           |
| Os03g0353400 | DOWN | PLA2-II  | Phospholipase A2 family protein                                                                                                                               |
| Os03g0356300 | DOWN | -        | Similar to 50S ribosomal protein L4, chloroplast precursor (R-protein L4)                                                                                     |
| Os03g0364400 | DOWN | -        | Protein of unknown function DUF2253, membrane domain containing protein                                                                                       |
| Os03g0364700 | DOWN | OsSIG2B  | Similar to Sigma factor SIG2B                                                                                                                                 |
| Os03g0367101 | DOWN | -        | Armadillo-like helical domain containing protein                                                                                                              |
| Os03g0377700 | DOWN | -        | Conserved hypothetical protein                                                                                                                                |
| Os03g0379500 | UP   | -        | Conserved hypothetical protein                                                                                                                                |
| Os03g0386000 | UP   | -        | DVL family protein                                                                                                                                            |
| Os03g0387300 | UP   | -        | Hypothetical conserved gene                                                                                                                                   |
| Os03g0390400 | UP   | -        | Hypothetical protein                                                                                                                                          |
| Os03g0400700 | UP   | -        | Protein of unknown function DUF26 domain containing protein                                                                                                   |

|              |      |             |                                                                                                      |
|--------------|------|-------------|------------------------------------------------------------------------------------------------------|
| Os03g0406100 | UP   | -           | Similar to Histone H2A                                                                               |
| Os03g0412800 | DOWN | -           | HAD-superfamily subfamily IIA hydrolase, CECR5 protein                                               |
| Os03g0418700 | DOWN | OsMSRM K2   | MAP Kinase                                                                                           |
| Os03g0422800 | DOWN | OsStr2      | Rhodanese-like domain containing protein                                                             |
| Os03g0431200 | UP   | SIP32       | Similar to pherophorin like protein                                                                  |
| Os03g0438400 | UP   | -           | Uncharacterised protein family UPF0497, trans-membrane plant domain containing protein               |
| Os03g0448600 | UP   | -           | COBRA-like protein 7 precursor                                                                       |
| Os03g0563300 | DOWN | OsRFP       | Zinc finger, RING/FYVE/PHD-type domain containing protein                                            |
| Os03g0570100 | UP   | -           | Similar to PPR2                                                                                      |
| Os03g0571700 | UP   | -           | Similar to Hypersensitive reaction associated Ca <sup>2+</sup> -binding protein                      |
| Os03g0571900 | UP   | CK1         | Serine/threonine protein kinase, Cold stress tolerance, Abiotic stress                               |
| Os03g0573001 | DOWN | OsWRKY5 5   | Similar to WRKY transcription factor 55                                                              |
| Os03g0575200 | DOWN | -           | NB-ARC domain containing protein                                                                     |
| Os03g0593600 | UP   | NAC58       | NAC Family transcriptional activator, Abiotic stress response, Positive regulator of leaf senescence |
| Os03g0597200 | DOWN | -           | Similar to 60S ribosomal protein L18                                                                 |
| Os03g0599000 | UP   | OsSWEET 16  | Similar to Cytochrome c oxidoreductase                                                               |
| Os03g0602600 | DOWN | OsTPS10     | Terpene synthase-like domain containing protein                                                      |
| Os03g0606100 | DOWN | -           | Similar to beta-amylase                                                                              |
| Os03g0606200 | UP   | -           | Conserved hypothetical protein                                                                       |
| Os03g0607700 | UP   | OsINO80     | Hypothetical conserved gene                                                                          |
| Os03g0617500 | DOWN | -           | Similar to Poly(A)-binding protein C-terminal interacting protein 6                                  |
| Os03g0622600 | UP   | -           | Ribosomal protein L6 family protein                                                                  |
| Os03g0626500 | UP   | OsBBS1      | Receptor-like cytoplasmic kinase, Leaf senescence, Salt stress response                              |
| Os03g0634400 | UP   | -           | Transcription elongation factor, TFIIS/CRSP70, N-terminal domain containing protein                  |
| Os03g0637600 | UP   | Os-CYP75A11 | Similar to cytochrome P450 flavonoid 3',5'-hydroxylase                                               |
| Os03g0638400 | UP   | OsCslA5     | Cellulose synthase-like A5                                                                           |
| Os03g0648600 | DOWN | -           | Similar to 40S ribosomal protein S9                                                                  |
| Os03g0650200 | UP   | SRWD5       | Similar to Salt-responsive WD40 protein 5                                                            |
| Os03g0655100 | UP   | OsVQ12      | Similar to VQ motif family protein, expressed                                                        |
| Os03g0656900 | DOWN | Os-COX6b1   | Similar to Cytochrome c oxidase subunit 6b                                                           |
| Os03g0660300 | DOWN | OsLEA11     | Similar to retrotransposon protein                                                                   |
| Os03g0660400 | DOWN | -           | Similar to Protein kinase domain containing protein, expressed                                       |
| Os03g0660500 | DOWN | SUS1        | Sucrose synthase 2 (EC 2.4.1.13) (Sucrose-UDP glucosyltransferase 2)                                 |

|              |      |           |                                                                                                                              |
|--------------|------|-----------|------------------------------------------------------------------------------------------------------------------------------|
| Os03g0661600 | UP   | -         | Hypothetical conserved gene                                                                                                  |
| Os03g0663400 | UP   | OsSPX5    | SPX domain-containing protein, Negative regulation of phosphate signaling, Pi homeostasi                                     |
| Os03g0663500 | UP   | OsG6PDH4  | Similar to Glucose-6-phosphate dehydrogenase precursor                                                                       |
| Os03g0667100 | DOWN | -         | Conserved hypothetical protein                                                                                               |
| Os03g0679700 | DOWN | -         | Similar to D-mannose binding lectin family protein, expressed                                                                |
| Os03g0682822 | UP   | -         | Similar to OSIGBa0135L04.1 protein                                                                                           |
| Os03g0684500 | DOWN | -         | Similar to N-acetyl-glutamate synthase                                                                                       |
| Os03g0684800 | DOWN | -         | Hypothetical protein                                                                                                         |
| Os03g0685500 | UP   | OsWD40-76 | WD40 repeat-like domain containing protein                                                                                   |
| Os03g0685700 | DOWN | ELL       | Magnesium-chelatase subunit ChII, Mg-chelatase I subunit, Chlorophyll biosynthesis, Chloroplast developmen                   |
| Os03g0685900 | UP   | -         | Conserved hypothetical protein                                                                                               |
| Os03g0686300 | DOWN | -         | Similar to Cytochrome P450 79A1 (EC 1.14.13.41) (Tyrosine N-monooxygenase) (Cytochrome P450Tyr)                              |
| Os03g0693900 | UP   | -         | Similar to TRANSPARENT TESTA 12 protein                                                                                      |
| Os03g0694000 | UP   | PEZ1      | Similar to transparent testa 12 protein                                                                                      |
| Os03g0701300 | DOWN | -         | Conserved hypothetical protein                                                                                               |
| Os03g0704000 | DOWN | OsHAK16   | Similar to Potassium transporter                                                                                             |
| Os03g0710000 | DOWN | CYP71W1   | Similar to Cytochrome P450 family protein, expressed                                                                         |
| Os03g0710600 | DOWN | YSA       | Pentatricopeptide repeat protein, Chloroplast developmen                                                                     |
| Os03g0712800 | UP   | -         | Hypothetical conserved gene                                                                                                  |
| Os03g0718000 | UP   | -         | NB-ARC domain containing protein                                                                                             |
| Os03g0718100 | UP   | HSA1      | PfkB family fructokinase, WLP2 paralog, Chloroplast biogenesis and plant growth, Protection of chloroplasts under heat stres |
| Os03g0718800 | UP   | -         | Similar to predicted protein                                                                                                 |
| Os03g0719400 | UP   | RMtATP6   | Mitochondrial ATP synthase 6 KD subunit                                                                                      |
| Os03g0722400 | DOWN | -         | Zinc finger, C2H2-like domain containing protein                                                                             |
| Os03g0726200 | UP   | CycD5     | Cyclin, C-terminal domain containing protein                                                                                 |
| Os03g0727600 | DOWN | -         | Conserved hypothetical protein                                                                                               |
| Os03g0728900 | DOWN | -         | Similar to predicted protein                                                                                                 |
| Os03g0734200 | UP   | OsCIPK07  | Serine/threonine protein kinase domain containing protein                                                                    |
| Os03g0734300 | UP   | -         | Leucine-rich repeat, plant specific containing protein                                                                       |
| Os03g0736300 | UP   | -         | Similar to OSIGBa0153E02-OSIGBa0093I20.19 protein                                                                            |
| Os03g0736400 | DOWN | -         | Similar to Zinc finger, C3HC4 type family protein, expressed                                                                 |
| Os03g0739700 | DOWN | -         | Similar to Cytochrome P450 CYP92C5                                                                                           |
| Os03g0744600 | UP   | -         | Similar to Cupin, RmlC-type                                                                                                  |
| Os03g0744700 | DOWN | NUS1      | Plastid RNA-binding protein, Regulation of chloroplast RNA metabolism, Early chloroplast development under cold stres        |

|              |      |           |                                                                          |
|--------------|------|-----------|--------------------------------------------------------------------------|
| Os03g0747700 | DOWN | Os-SAUR15 | Auxin responsive SAUR protein domain containing protein                  |
| Os03g0748300 | DOWN | Os-SAUR16 | Hypothetical conserved gene                                              |
| Os03g0749300 | UP   | Os-SAUR17 | Auxin responsive SAUR protein domain containing protein                  |
| Os03g0752300 | DOWN | OsPR5     | Similar to Alpha-amylase/trypsin inhibitor (Antifungal protein)          |
| Os03g0752400 | DOWN | OsLP      | Similar to Thaumatin-like protein                                        |
| Os03g0757100 | UP   | TLP       | Similar to Osmotin precursor                                             |
| Os03g0759700 | UP   | OsNPR3    | Similar to NPR1-like protein                                             |
| Os03g0760200 | UP   | OsTHIC    | Similar to Thiamine biosynthesis protein thiC                            |
| Os03g0764000 | UP   | -         | Hypothetical protein                                                     |
| Os03g0764600 | UP   | -         | Similar to glycosyltransferase family protein 47                         |
| Os03g0769100 | DOWN | -         | Conserved hypothetical protein                                           |
| Os03g0773300 | DOWN | -         | CHCH domain containing protein                                           |
| Os03g0776150 | DOWN | -         | Conserved hypothetical protein                                           |
| Os03g0777700 | DOWN | -         | Similar to F1N21.17                                                      |
| Os03g0781000 | DOWN | -         | Similar to unconventional myosin heavy chain                             |
| Os03g0783700 | UP   | OsOxO3    | Similar to Oxalate oxidase 1 (EC 1.2.3.4) (Germin)                       |
| Os03g0784600 | DOWN | OsOxo4    | Similar to Oxalate oxidase 1 (EC 1.2.3.4) (Germin)                       |
| Os03g0789466 | DOWN | -         | Similar to predicted protein                                             |
| Os03g0794200 | UP   | -         | Similar to 30S ribosomal protein S13                                     |
| Os03g0795200 | DOWN | -         | Protein of unknown function DUF292, eukaryotic domain containing protein |
| Os03g0799300 | UP   | -         | Conserved hypothetical protein                                           |
| Os03g0799700 | DOWN | OsGS1     | Cytosolic glutamine synthetas                                            |
| Os03g0807400 | DOWN | OASB2     | Similar to Anthranilate synthase beta chain                              |
| Os03g0811100 | DOWN | ACT1      | Actin 1                                                                  |
| Os03g0811400 | UP   | -         | Similar to Physical impedance induced protein                            |
| Os03g0811800 | UP   | -         | Alpha/beta hydrolase fold-1 domain containing protein                    |
| Os03g0815100 | DOWN | OsDDM1b   | Chromatin remodeling factor, Genome-wide DNA methylatio                  |
| Os03g0816200 | UP   | OsITPK3   | Similar to Hydroxyproline-rich glycoprotein DZ-HRGP precursor            |
| Os03g0816950 | DOWN | ACS1      | ACC synthase, Ethylene biosynthesi                                       |
| Os03g0817200 | UP   | OsbHLH084 | Helix-loop-helix DNA-binding domain containing protein                   |
| Os03g0821900 | DOWN | -         | Conserved hypothetical protein                                           |
| Os03g0824100 | DOWN | -         | Similar to Proteinase inhibitor type II CEVI57 precursor                 |
| Os03g0825500 | DOWN | OsGH9A3   | Similar to CEL6=CELLULASE 6 (Fragment)                                   |
| Os03g0826800 | DOWN | -         | Protein of unknown function methylase putative domain containing protein |
| Os03g0827700 | DOWN | -         | Uncharacterised protein family UPF0114 domain containing protein         |
| Os03g0828100 | DOWN | -         | Similar to Ripening-associated protein (Fragment)                        |
| Os03g0828800 | DOWN | -         | Conserved hypothetical protein                                           |

|              |      |           |                                                                                                              |
|--------------|------|-----------|--------------------------------------------------------------------------------------------------------------|
| Os03g0830800 | UP   | -         | Similar to photosystem II 11 kDa protein-related                                                             |
| Os03g0835100 | DOWN | -         | Aldose 1-epimerase family protein                                                                            |
| Os03g0835150 | UP   | OsBGLU1   | Similar to Exoglucanase precursor                                                                            |
| Os03g0835400 | UP   | -         | Similar to 50S ribosomal protein l6                                                                          |
| Os03g0838800 | UP   | TPKA      | Two-pore K <sup>+</sup> channel family protein, K <sup>+</sup> homeostasi                                    |
| Os03g0841100 | DOWN | -         | Hypothetical conserved gene                                                                                  |
| Os03g0843400 | DOWN | -         | UDP-glucuronosyl/UDP-glucosyltransferase family protein                                                      |
| Os03g0844000 | DOWN | OsBHLH066 | Similar to ER33 protein (Fragment)                                                                           |
| Os03g0848100 | DOWN | bel       | Cytochrome P450 family protein                                                                               |
| Os03g0851500 | UP   | -         | Acyl-CoA N-acyltransferase domain containing protein                                                         |
| Os03g0852700 | DOWN | -         | Homeodomain-like containing protein                                                                          |
| Os03g0861700 | DOWN | WGL2      | Chloroplast ribosomal protein S9, Early chloroplast developmen                                               |
| Os04g0102500 | UP   | -         | Protein kinase, core domain containing protein                                                               |
| Os04g0103601 | UP   | -         | Conserved hypothetical protein                                                                               |
| Os04g0103800 | DOWN | -         | Hypothetical protein                                                                                         |
| Os04g0105400 | UP   | -         | FAR1 DNA binding domain domain containing protein                                                            |
| Os04g0111200 | UP   | -         | Conserved hypothetical protein                                                                               |
| Os04g0111250 | UP   | -         | Similar to AP-1 complex subunit sigma-2                                                                      |
| Os04g0115700 | UP   | -         | Conserved hypothetical protein                                                                               |
| Os04g0118700 | DOWN | OsFLA24   | FAS1 domain domain containing protein                                                                        |
| Os04g0118800 | DOWN | -         | Similar to Protein argonaute MEL1                                                                            |
| Os04g0119000 | DOWN | -         | Similar to N-acetyltransferase                                                                               |
| Os04g0120100 | DOWN | OsGDH1    | Similar to Glutamate dehydrogenase (EC 1.4.1.3) (GDH)                                                        |
| Os04g0121900 | UP   | -         | Pentatricopeptide repeat domain containing protein                                                           |
| Os04g0126500 | UP   | -         | Conserved hypothetical protein                                                                               |
| Os04g0126900 | UP   | TSV3      | Obg subfamily of small GTP-binding protein, Chloroplast development at the early leaf stage under cold stres |
| Os04g0127300 | UP   | -         | Pentatricopeptide repeat domain containing protein                                                           |
| Os04g0131850 | DOWN | OsChlD    | Magnesium-chelatase subunit ChlD, Chlorophyll synthesis, Chloroplast de-velopmen                             |
| Os04g0165700 | UP   | OsBHLH041 | Similar to DNA binding protein                                                                               |
| Os04g0169500 | UP   | -         | Ribosomal protein L36 family protein                                                                         |
| Os04g0169666 | UP   | SNAC1     | Similar to OsNAC6 protein                                                                                    |
| Os04g0179700 | UP   | -         | Ribosomal protein S26e domain containing protein                                                             |
| Os04g0181901 | UP   | -         | Hypothetical protein                                                                                         |
| Os04g0194433 | UP   | OsANT2    | Amino acid transporter, transmembrane domain containing protein                                              |
| Os04g0194500 | DOWN | OsRLCK118 | Similar to Protein kinase APK1A, chloroplast precursor (EC 2.7.1.-)                                          |
| Os04g0202500 | DOWN | OspTAC2   | Pentatricopeptide repeat protein, Regulation of chloroplast developmen                                       |

|              |      |            |                                                                                                 |
|--------------|------|------------|-------------------------------------------------------------------------------------------------|
| Os04g0204400 | DOWN | -          | Transcription antitermination protein, NusG, N-terminal domain containing protein               |
| Os04g0206700 | UP   | -          | Conserved hypothetical protein                                                                  |
| Os04g0209200 | UP   | OsRH3      | Similar to ATP-dependent RNA helicase                                                           |
| Os04g0218600 | DOWN | -          | Similar to 50S ribosomal protein L18, chloroplastic                                             |
| Os04g0219600 | DOWN | -          | Serine/threonine protein kinase-related domain containing protein                               |
| Os04g0233400 | DOWN | -          | Pectinesterase inhibitor domain containing protein                                              |
| Os04g0247700 | DOWN | -          | Similar to Chloroplast protein import component Toc159                                          |
| Os04g0253000 | DOWN | -          | Conserved hypothetical protein                                                                  |
| Os04g0284900 | UP   | -          | Similar to Uvs101                                                                               |
| Os04g0293100 | DOWN | -          | Zinc finger, C2H2 domain containing protein                                                     |
| Os04g0293300 | UP   | OsWAK28    | Serine/threonine protein kinase-related domain containing protein                               |
| Os04g0301500 | DOWN | -          | Similar to 30S ribosomal protein S6, chloroplast precursor (Fragment)                           |
| Os04g0304250 | DOWN | OsHOL1     | Methyl chloride transferase                                                                     |
| Os04g0316200 | UP   | -          | Pentatricopeptide repeat domain containing protein                                              |
| Os04g0320700 | DOWN | LDC        | Similar to Ser/Thr protein phosphatase family protein, expressed                                |
| Os04g0322100 | UP   | OsRad52-2a | Homolog of Rad52 (Radiation sensitive 52), Mediation of homologous recombination and DNA repair |
| Os04g0326300 | UP   | -          | Pentatricopeptide repeat domain containing protein                                              |
| Os04g0337000 | DOWN | -          | Rhodanese-like domain containing protein                                                        |
| Os04g0337201 | DOWN | -          | Similar to OSIGBa0123D13.3 protein                                                              |
| Os04g0339400 | UP   | -          | Conserved hypothetical protein                                                                  |
| Os04g0346800 | UP   | -          | Hypothetical protein                                                                            |
| Os04g0360500 | UP   | Os-COMTL2  | Similar to 0-methyltransferase (EC 2.1.1.6) (Fragment)                                          |
| Os04g0366000 | DOWN | -          | Similar to B0616E02-H0507E05.3 protein                                                          |
| Os04g0367000 | DOWN | -          | Similar to ATP sulfurylase (Fragment)                                                           |
| Os04g0368000 | DOWN | -          | Conserved hypothetical protein                                                                  |
| Os04g0369600 | UP   | -          | Hypothetical protein                                                                            |
| Os04g0370500 | DOWN | -          | Pentatricopeptide repeat domain containing protein                                              |
| Os04g0372700 | DOWN | -          | NB-ARC domain containing protein                                                                |
| Os04g0372750 | DOWN | -          | Similar to H0716A07.5 protein                                                                   |
| Os04g0376300 | UP   | OsSLPP1    | Similar to H0716A07.11 protein                                                                  |
| Os04g0380300 | DOWN | -          | Hypothetical conserved gene                                                                     |
| Os04g0385600 | DOWN | -          | Hypothetical conserved gene                                                                     |
| Os04g0402100 | UP   | -          | Hypothetical protein                                                                            |
| Os04g0404400 | UP   | -          | Similar to H0124E07.4 protein                                                                   |
| Os04g0405300 | UP   | OsSub38    | Peptidase S8 and S53, subtilisin, kexin, sedolisin domain containing protein                    |
| Os04g0412300 | DOWN | -          | Similar to UDP-glucose:sterol glucosyltransferase                                               |
| Os04g0415200 | UP   | OsCAS      | Cysteine synthase (EC 2.5.1.47)                                                                 |
| Os04g0417600 | DOWN | -          | Similar to Avr9/Cf-9 rapidly elicited protein 137                                               |

|              |      |               |                                                                                           |
|--------------|------|---------------|-------------------------------------------------------------------------------------------|
| Os04g0417800 | DOWN | -             | Hypothetical protein                                                                      |
| Os04g0418000 | UP   | OsKS4         | 9-beta-pimara-7,15-diene synthase, Momilactone phytoalexins biosynthesis, Defense respons |
| Os04g0418800 | UP   | -             | Hypothetical conserved gene                                                               |
| Os04g0419100 | UP   | -             | 2OG-Fe(II) oxygenase domain containing protein                                            |
| Os04g0419400 | DOWN | -             | Hypothetical gene                                                                         |
| Os04g0419900 | DOWN | OsABCG8       | Similar to ABC transporter-like protein                                                   |
| Os04g0420700 | DOWN | OsRLCK1<br>35 | Similar to H0512B01.12 protein                                                            |
| Os04g0420801 | DOWN | -             | Hypothetical protein                                                                      |
| Os04g0432600 | UP   | -             | UDP-glucuronosyl/UDP-glucosyltransferase family protein                                   |
| Os04g0439400 | DOWN | OsABCC9       | Similar to MRP-like ABC transporter                                                       |
| Os04g0442300 | UP   | -             | Conserved hypothetical protein                                                            |
| Os04g0444800 | DOWN | rNBS17        | Similar to NBS-LRR protein (Fragment)                                                     |
| Os04g0445700 | DOWN | OsPIP2        | Similar to Arabidopsis thaliana (Fragment)                                                |
| Os04g0448300 | UP   | -             | Similar to H0315A08.1 protein                                                             |
| Os04g0448800 | UP   | H1            | Similar to Histone H1                                                                     |
| Os04g0452700 | DOWN | -             | Similar to OSIGBa0145C02.7 protein                                                        |
| Os04g0460300 | UP   | -             | Similar to Auxin-binding protein ABP20                                                    |
| Os04g0464800 | DOWN | -             | Hypothetical protein                                                                      |
| Os04g0469000 | DOWN | -             | Similar to Tropinone reductase-I (EC 1.1.1.206) (TR-I) (Tropine dehydrogenase)            |
| Os04g0469700 | DOWN | OsbHLH0<br>06 | Helix-loop-helix DNA-binding domain containing protein                                    |
| Os04g0469800 | DOWN | -             | Hypothetical protein                                                                      |
| Os04g0474300 | UP   | -             | Protein of unknown function DUF26 domain containing protein                               |
| Os04g0474800 | UP   | -             | Similar to Glucosyltransferase (Fragment)                                                 |
| Os04g0482900 | UP   | -             | Protein of unknown function DUF26 domain containing protein                               |
| Os04g0483200 | DOWN | -             | Hypothetical conserved gene                                                               |
| Os04g0488100 | DOWN | OsSTA120      | Peptidase aspartic, catalytic domain containing protein                                   |
| Os04g0490500 | DOWN | -             | Similar to OSIGBa0137O04.8 protein                                                        |
| Os04g0494100 | UP   | -             | Aldo/keto reductase family protein                                                        |
| Os04g0494300 | DOWN | OsAKR         | Aldo/keto reductase family protein                                                        |
| Os04g0511200 | UP   | -             | Similar to OSIGBa0111I14.3 protein                                                        |
| Os04g0513400 | UP   | -             | Similar to OSIGBa0111E13.1 protein                                                        |
| Os04g0514600 | DOWN | -             | Similar to OSIGBa0110B10.6 protein                                                        |
| Os04g0515400 | UP   | -             | Hypothetical conserved gene                                                               |
| Os04g0517100 | DOWN | OsWAK43       | Serine/threonine protein kinase-related domain containing protein                         |
| Os04g0517700 | UP   | -             | Similar to OSIGBa0107E14.3 protein                                                        |
| Os04g0519700 | DOWN | Os_F0607      | Similar to OSIGBa0107E14.10 protein                                                       |
| Os04g0524600 | DOWN | -             | Similar to Quinone-oxidoreductase QR1 (Fragment)                                          |

|              |      |                |                                                                                                                                |
|--------------|------|----------------|--------------------------------------------------------------------------------------------------------------------------------|
| Os04g0527400 | UP   | -              | Non-protein coding transcript                                                                                                  |
| Os04g0527700 | UP   | -              | Similar to 3-oxoacyl-reductase                                                                                                 |
| Os04g0528800 | UP   | OsFbox203      | Kelch-type beta propeller domain containing protein                                                                            |
| Os04g0535200 | UP   | Os_F0796       | Tetratricopeptide-like helical domain containing protein                                                                       |
| Os04g0535600 | UP   | OsCNX          | Similar to Calnexin (Fragment)                                                                                                 |
| Os04g0538166 | DOWN | OsEnS-64       | Similar to H0502B11.4 protein                                                                                                  |
| Os04g0544400 | DOWN | Os-SDR110C-MS3 | Similar to Stem secoisolariciresinol dehydrogenase (Fragment)                                                                  |
| Os04g0550600 | UP   | -              | Similar to H0717B12.10 protein                                                                                                 |
| Os04g0551700 | DOWN | -              | TB2/DP1 and HVA22 related protein family protein                                                                               |
| Os04g0555300 | DOWN | OsVQ15         | Similar to OSIGBa0092M08.12 protein                                                                                            |
| Os04g0556400 | DOWN | OsWD40-100     | WD40 repeat-like domain containing protein                                                                                     |
| Os04g0556500 | DOWN | -              | Conserved hypothetical protein                                                                                                 |
| Os04g0557000 | DOWN | -              | Similar to Hydroxyproline-rich glycoprotein                                                                                    |
| Os04g0559550 | UP   | -              | Conserved hypothetical protein                                                                                                 |
| Os04g0559700 | UP   | -              | Conserved hypothetical protein                                                                                                 |
| Os04g0559750 | UP   | YK18           | Similar to H0525E10.7 protein                                                                                                  |
| Os04g0561500 | DOWN | -              | Hypothetical protein                                                                                                           |
| Os04g0565200 | UP   | -              | Hypothetical protein                                                                                                           |
| Os04g0565500 | DOWN | -              | Similar to H0315E07.2 protein                                                                                                  |
| Os04g0566600 | UP   | -              | Similar to H0525C06.6 protein                                                                                                  |
| Os04g0571600 | DOWN | OSRR1          | A-type response regulator, Cytokinin signalin                                                                                  |
| Os04g0572200 | DOWN | OsFRO7         | Ferric reductase-like transmembrane component family protein                                                                   |
| Os04g0572600 | DOWN | -              | Similar to OSIGBa0140O07.8 protein                                                                                             |
| Os04g0583700 | DOWN | -              | Peptidase A1 domain containing protein                                                                                         |
| Os04g0584600 | DOWN | OsPT17         | Similar to Mitochondrial phosphate transporter (Fragment)                                                                      |
| Os04g0585900 | UP   | OsMST1         | Similar to Monosaccharide transporter 1                                                                                        |
| Os04g0586500 | DOWN | OsATL13        | Amino acid transporter, transmembrane domain containing protein                                                                |
| Os04g0588500 | DOWN | -              | Similar to OSIGBa0130P02.2 protein                                                                                             |
| Os04g0597501 | DOWN | -              | Heavy metal transport/detoxification protein domain containing protein                                                         |
| Os04g0601700 | UP   | -              | Hypothetical protein                                                                                                           |
| Os04g0601800 | DOWN | D11            | Cytochrome P450 superfamily protein, CYP724B1, Brassinosteroid (BR) biosynthesis, Control of panicle architecture and seed siz |
| Os04g0604300 | DOWN | Os4bglu9       | Glycoside hydrolase, family 1 protein                                                                                          |
| Os04g0610400 | DOWN | Os4bglu12      | Similar to OSIGBa0135C13.7 protein                                                                                             |
| Os04g0610500 | DOWN | -              | Similar to H0525D09.12 protein                                                                                                 |
| Os04g0611700 | UP   | -              | Steroid nuclear receptor, ligand-binding domain containing protein                                                             |

|              |      |           |                                                                                                                           |
|--------------|------|-----------|---------------------------------------------------------------------------------------------------------------------------|
| Os04g0612000 | UP   | OsRad21-2 | Rad21/Rec8 like protein, C-terminal domain containing protein                                                             |
| Os04g0614300 | UP   | OsRLCK152 | Protein kinase-like domain domain containing protein                                                                      |
| Os04g0615500 | DOWN | Cht5      | Similar to Chitinase                                                                                                      |
| Os04g0616200 | UP   | -         | Hypothetical gene                                                                                                         |
| Os04g0616600 | UP   | EFA27     | EFA27 for EF hand, abscisic acid, 27kD                                                                                    |
| Os04g0617200 | DOWN | Os4bglu16 | Similar to Beta-glucosidase                                                                                               |
| Os04g0617500 | DOWN | -         | Similar to NBS-LRR type disease resistance protein O2 (Fragment)                                                          |
| Os04g0617900 | UP   | -         | NTP pyrophosphohydrolase MazG, putative catalytic core domain containing protein                                          |
| Os04g0619400 | DOWN | -         | Similar to OSIGBa0145M07.3 protein                                                                                        |
| Os04g0619900 | DOWN | OsMyb4    | Similar to OSIGBa0145M07.4 protein                                                                                        |
| Os04g0621500 | DOWN | OsWAK51   | Similar to OSIGBa0145M07.8 protein                                                                                        |
| Os04g0623066 | DOWN | OsARF10   | Similar to Auxin response factor 10                                                                                       |
| Os04g0629600 | DOWN | OsS40-13  | Protein of unknown function DUF584 family protein                                                                         |
| Os04g0630600 | DOWN | OsYSL12   | Oligopeptide transporter OPT superfamily protein                                                                          |
| Os04g0630900 | DOWN | -         | BRO1 domain containing protein                                                                                            |
| Os04g0632400 | DOWN | -         | CHCH domain containing protein                                                                                            |
| Os04g0636300 | DOWN | -         | Similar to Ferredoxin-thioredoxin reductase, variable chain (FTR-V) (Ferredoxin- thioredoxin reductase subunit A) (FTR-A) |
| Os04g0639300 | DOWN | -         | Similar to OSIGBa0125M19.13 protein                                                                                       |
| Os04g0643200 | DOWN | -         | Peptidase A1 domain containing protein                                                                                    |
| Os04g0644900 | UP   | OSINV2    | Similar to Beta-fructofuranosidase 1 precursor (EC 3.2.1.26) (Sucrose 1) (Invertase 1)                                    |
| Os04g0645200 | UP   | -         | Similar to Elongation factor G, chloroplastic                                                                             |
| Os04g0647900 | DOWN | -         | Hypothetical conserved gene                                                                                               |
| Os04g0648400 | DOWN | HTD1      | Carotenoid cleavage dioxygenase, Negative regulation of the outgrowth of axillary buds, Strigolactones biosynthesi        |
| Os04g0651000 | UP   | -         | PAP fibrillin family protein                                                                                              |
| Os04g0657500 | DOWN | FCO11     | Similar to glycerol 3-phosphate permease                                                                                  |
| Os04g0660600 | UP   | -         | Similar to UDP-glycosyltransferase UGT93B9                                                                                |
| Os04g0664500 | UP   | CZOGT1    | cis-Zeatin-O-glucosyltransferase, Catalyze O-glucosylation of cZ and cZ-ri-bosid                                          |
| Os04g0667600 | DOWN | -         | Similar to Genetic modifier                                                                                               |
| Os04g0673300 | UP   | -         | Conserved hypothetical protein                                                                                            |
| Os04g0674700 | UP   | OsPIP1    | Similar to Aquaporin PIP1.1                                                                                               |
| Os04g0674800 | UP   | -         | Hypothetical protein                                                                                                      |
| Os04g0675200 | DOWN | OsPOP9    | Similar to Prolyl endopeptidase (EC 3.4.21.26) (Post-proline cleaving enzyme) (PE)                                        |
| Os04g0678700 | DOWN | -         | Similar to Cis-zeatin O-glucosyltransferase 1 (EC 2.4.1.215) (cisZOG1)                                                    |

|              |      |               |                                                                                                                                                                                                                                         |
|--------------|------|---------------|-----------------------------------------------------------------------------------------------------------------------------------------------------------------------------------------------------------------------------------------|
| Os04g0680700 | DOWN | OsANT4        | Similar to OSIGBa0158F05.8 protein                                                                                                                                                                                                      |
| Os04g0684500 | DOWN | -             | Homeodomain-like containing protein                                                                                                                                                                                                     |
| Os04g0684900 | DOWN | -             | Multi antimicrobial extrusion protein MatE family protein                                                                                                                                                                               |
| Os04g0685300 | DOWN | OsERF         | -                                                                                                                                                                                                                                       |
| Os04g0687800 | UP   | -             | Similar to DNA-directed RNA polymerase                                                                                                                                                                                                  |
| Os04g0691800 | UP   | -             | Hypothetical conserved gene                                                                                                                                                                                                             |
| Os05g0100100 | UP   | -             | Zinc finger, FYVE-type domain containing protein                                                                                                                                                                                        |
| Os05g0103800 | UP   | Os-<br>CDPK13 | Similar to Calcium dependent protein kinase                                                                                                                                                                                             |
| Os05g0104200 | UP   | -             | Protein of unknown function DUF581 family protein                                                                                                                                                                                       |
| Os05g0106200 | UP   | -             | Malectin-like carbohydrate-binding domain domain containing protein                                                                                                                                                                     |
| Os05g0109825 | DOWN | -             | Hypothetical gene                                                                                                                                                                                                                       |
| Os05g0112800 | UP   | -             | Similar to OSJNba0093F12.10 protein                                                                                                                                                                                                     |
| Os05g0116000 | UP   | -             | Similar to Vacuolar ATP synthase subunit G 1 (EC 3.6.3.14) (V-ATPase G subunit 1) (Vacuolar proton pump G subunit 1)                                                                                                                    |
| Os05g0122800 | UP   | -             | Similar to Plastid protein                                                                                                                                                                                                              |
| Os05g0123000 | UP   | OsXTH9        | Similar to Xyloglucan endotransglucosylase/hydrolase protein 24 precursor (EC 2.4.1.207) (At-XTH24) (XTH-24) (Meristem protein 5) (MERI-5 protein) (MERI5 protein) (Endo-xyloglucan transferase) (Xyloglucan endo-1,4-beta-D-glucanase) |
| Os05g0126400 | DOWN | ERF77         | APETALA-2-like transcription Factor, Control of the abscisic acid (ABA)/gibberellin (GA) balance                                                                                                                                        |
| Os05g0127200 | UP   | -             | Peptidase M24A, methionine aminopeptidase, subfamily 1 protein                                                                                                                                                                          |
| Os05g0127300 | DOWN | OsKS3         | Similar to Ent-kaurene synthase-like 3                                                                                                                                                                                                  |
| Os05g0127400 | UP   | KS2           | Ent-beyerene synthase, Phytoalexin biosynthesis, Defense response                                                                                                                                                                       |
| Os05g0127500 | UP   | -             | Hypothetical conserved gene                                                                                                                                                                                                             |
| Os05g0128100 | DOWN | OsISC39       | Similar to H0525G02.2 protein                                                                                                                                                                                                           |
| Os05g0131500 | DOWN | OsRLCK1<br>59 | Similar to H0525G02.9 protein                                                                                                                                                                                                           |
| Os05g0132100 | DOWN | -             | Serine/threonine protein kinase-related domain containing protein                                                                                                                                                                       |
| Os05g0132800 | UP   | -             | Conserved hypothetical protein                                                                                                                                                                                                          |
| Os05g0134400 | UP   | -             | Similar to H0313F03.4 protein                                                                                                                                                                                                           |
| Os05g0135500 | UP   | OsGLP4-1      | Similar to germin-like protein subfamily 1 member 11                                                                                                                                                                                    |
| Os05g0135700 | UP   | OsRLCK1<br>60 | Protein kinase, core domain containing protein                                                                                                                                                                                          |
| Os05g0137200 | DOWN | -             | Similar to H0114G12.10 protein                                                                                                                                                                                                          |
| Os05g0142400 | UP   | -             | Disease resistance protein domain containing protein                                                                                                                                                                                    |
| Os05g0142500 | UP   | -             | Similar to XA1                                                                                                                                                                                                                          |
| Os05g0145100 | UP   | GLO3          | Similar to H0215F08.7 protein                                                                                                                                                                                                           |
| Os05g0147500 | DOWN | -             | Conserved hypothetical protein                                                                                                                                                                                                          |
| Os05g0152201 | UP   | OsSTA134      | Similar to H0323C08.16 protein                                                                                                                                                                                                          |

|              |      |              |                                                                                                                           |
|--------------|------|--------------|---------------------------------------------------------------------------------------------------------------------------|
| Os05g0155100 | UP   | -            | Similar to H0105C05.3 protein                                                                                             |
| Os05g0156500 | UP   | -            | Hypothetical protein                                                                                                      |
| Os05g0156700 | DOWN | -            | Similar to H0410G08.15 protein                                                                                            |
| Os05g0157500 | DOWN | -            | Conserved hypothetical protein                                                                                            |
| Os05g0165900 | DOWN | -            | Amidase family protein                                                                                                    |
| Os05g0166450 | UP   | Os-NTMC2T2.1 | C2 domain containing protein                                                                                              |
| Os05g0176600 | UP   | OsVQ16       | VQ domain containing protein                                                                                              |
| Os05g0179100 | UP   | -            | Leucine-rich repeat, N-terminal domain containing protein                                                                 |
| Os05g0179300 | UP   | -            | Similar to H0811D08.17 protein                                                                                            |
| Os05g0181300 | DOWN | OsGT43I      | Similar to H0212B02.9 protein                                                                                             |
| Os05g0181700 | DOWN | PRX57        | Similar to Peroxidase                                                                                                     |
| Os05g0184901 | UP   | -            | Lipase, class 3 family protein                                                                                            |
| Os05g0195101 | DOWN | -            | ATPase, V0 complex, subunit E domain containing protein                                                                   |
| Os05g0195700 | UP   | Os-AHT1      | Similar to H1005F08.2 protein                                                                                             |
| Os05g0202800 | DOWN | -            | Heavy metal transport/detoxification protein domain containing protein                                                    |
| Os05g0203900 | DOWN | RR6          | A-type response regulator, Cytokinin signalin                                                                             |
| Os05g0207300 | UP   | -            | Similar to AMP-binding protein (Adenosine monophosphate binding protein 5 AMPBP5)                                         |
| Os05g0215300 | DOWN | OsGH9C1      | Similar to CEL1=CELLULASE 1 (Fragment)                                                                                    |
| Os05g0222200 | DOWN | -            | Similar to H0103C06.6 protein                                                                                             |
| Os05g0226300 | DOWN | OsDof17      | Zinc finger, Dof-type domain containing protein                                                                           |
| Os05g0226900 | UP   | OsPorA       | Similar to Protochlorophyllide reductase (EC 1.3.1.33) (PCR) (NADPH- protochlorophyllide oxidoreductase) (POR) (Fragment) |
| Os05g0227600 | UP   | -            | DNA mismatch repair protein MutS, core domain containing protein                                                          |
| Os05g0230700 | DOWN | WSL5         | Pentatricopeptide repeat protein, Chloroplast development under cold stres                                                |
| Os05g0244700 | UP   | OsCAF1B      | Component of the CCR4-NOTcomplex, Deadenylase, Deadenylation (poly(A) tail shortening), Development and stress respons    |
| Os05g0245700 | UP   | -            | Harpin-induced 1 domain containing protein                                                                                |
| Os05g0247100 | UP   | OsUMA-MIT7   | Protein of unknown function DUF6, transmembrane domain containing protein                                                 |
| Os05g0253200 | DOWN | -            | C2 domain containing protein                                                                                              |
| Os05g0256100 | DOWN | -            | Similar to cDNA clone:006-204-G09, full insert sequence                                                                   |
| Os05g0256500 | DOWN | -            | Conserved hypothetical protein                                                                                            |
| Os05g0275000 | DOWN | PGIP2        | Leucine-rich repeat (LRR) protein, Inhibitor of fungal polygalacturonase, Defence respons                                 |
| Os05g0275100 | DOWN | PGIP1        | Polygalacturonase inhibiting protein, Inhibitor of fungal polygalacturonase, Sheath blight resistanc                      |
| Os05g0304600 | DOWN | OsUMA-MIT8   | Protein of unknown function DUF6, transmembrane domain containing protein                                                 |

|              |      |            |                                                                                                         |
|--------------|------|------------|---------------------------------------------------------------------------------------------------------|
| Os05g0315100 | DOWN | -          | Hypothetical protein                                                                                    |
| Os05g0323400 | UP   | -          | Protein of unknown function DUF26 domain containing protein                                             |
| Os05g0323900 | UP   | -          | Cupin, RmlC-type domain containing protein                                                              |
| Os05g0349700 | DOWN | OsTET7     | Tetraspanin domain containing protein                                                                   |
| Os05g0361900 | DOWN | -          | Similar to Lateral organ boundaries domain 1                                                            |
| Os05g0362300 | UP   | OsGT43A    | Glycosyl transferase, family 43 protein                                                                 |
| Os05g0365300 | DOWN | -          | Conserved hypothetical protein                                                                          |
| Os05g0368300 | UP   | OsPLC4     | Similar to Phospholipase C (Fragment)                                                                   |
| Os05g0369900 | UP   | OsCRR3     | Serine/threonine protein kinase domain containing protein                                               |
| Os05g0371166 | UP   | OsDjB5     | Similar to DnaJ subfamily B member 13                                                                   |
| Os05g0374500 | DOWN | -          | Similar to Leucoanthocyanidin dioxygenase-like protein                                                  |
| Os05g0377000 | UP   | -          | Hypothetical conserved gene                                                                             |
| Os05g0380850 | DOWN | -          | Ferroporti-1 domain containing protein                                                                  |
| Os05g0381500 | DOWN | OsLACS1    | AMP-dependent synthetase and ligase domain containing protein                                           |
| Os05g0388500 | DOWN | -          | Conserved hypothetical protein                                                                          |
| Os05g0390100 | DOWN | PRX65      | Haem peroxidase, plant/fungal/bacterial family protein                                                  |
| Os05g0390550 | DOWN | PRX71      | Haem peroxidase family protein                                                                          |
| Os05g0390800 | DOWN | OsSAMS1    | S-adenosylmethionine synthetase 1 (EC 2.5.1.6) (Methionine adenosyltransferase 1) (AdoMet synthetase 1) |
| Os05g0397300 | DOWN | OsA-BCB17  | Similar to P-glycoprotein ABCB5                                                                         |
| Os05g0400400 | UP   | Os-MYB2P-1 | R2R3 MYB transcription factor, Regulation of phosphate-starvation responses and root architecture       |
| Os05g0402700 | UP   | -          | Conserved hypothetical protein                                                                          |
| Os05g0405400 | DOWN | -          | Hypothetical conserved gene                                                                             |
| Os05g0406100 | UP   | -          | Conserved hypothetical protein                                                                          |
| Os05g0406200 | UP   | OsDegp6    | Similar to DEGP2 (DEGP PROTEASE 2); serine-type peptidase/ trypsin                                      |
| Os05g0411200 | DOWN | -          | Conserved hypothetical protein                                                                          |
| Os05g0414600 | DOWN | RPL18      | Similar to 60S ribosomal protein L18                                                                    |
| Os05g0420600 | UP   | OsDjB6     | Similar to Apobec-1 binding protein 2                                                                   |
| Os05g0423701 | DOWN | -          | Similar to Dihydrolipoyl dehydrogenase                                                                  |
| Os05g0426350 | UP   | -          | Conserved hypothetical protein                                                                          |
| Os05g0427100 | DOWN | -          | Serine/threonine protein kinase-related domain containing protein                                       |
| Os05g0429400 | DOWN | -          | Hypothetical gene                                                                                       |
| Os05g0430400 | DOWN | -          | Conserved hypothetical protein                                                                          |
| Os05g0431700 | UP   | -          | DVL family protein                                                                                      |
| Os05g0432200 | UP   | OsAT7      | Transferase family protein                                                                              |
| Os05g0438800 | UP   | -          | Conserved hypothetical protein                                                                          |
| Os05g0442400 | UP   | -          | Conserved hypothetical protein                                                                          |
| Os05g0442700 | DOWN | -          | Phospholipase A2, active site domain containing protein                                                 |
| Os05g0445900 | DOWN | -          | Vegetative storage protein/acid phosphatase domain containing protein                                   |

|              |      |             |                                                                                            |
|--------------|------|-------------|--------------------------------------------------------------------------------------------|
| Os05g0446550 | DOWN | -           | Similar to Stem 28 kDa glycoprotein                                                        |
| Os05g0449900 | DOWN | -           | Non-protein coding transcript                                                              |
| Os05g0452500 | DOWN | -           | Similar to Transcription factor MYBS2                                                      |
| Os05g0453300 | DOWN | -           | Conserved hypothetical protein                                                             |
| Os05g0464001 | DOWN | MTd         | Similar to Metallothionein-like protein 3B                                                 |
| Os05g0464300 | UP   | -           | Conserved hypothetical protein                                                             |
| Os05g0469800 | UP   | OsRPL5      | Similar to 60S ribosomal protein L11-2 (L16). Splice isoform 2                             |
| Os05g0471000 | DOWN | OsGELP64    | Lipase, GDSL domain containing protein                                                     |
| Os05g0471350 | DOWN | -           | UDP-glucuronosyl/UDP-glucosyltransferase family protein                                    |
| Os05g0473500 | DOWN | OsA-BCG12   | ABC transporter-like domain containing protein                                             |
| Os05g0474800 | DOWN | -           | Similar to FIP1                                                                            |
| Os05g0477600 | DOWN | OsRePRP1.1  | Proline-rich glycoprotein, ABA-dependent inhibition of root growth                         |
| Os05g0482501 | UP   | OsRePRP1.2  | Proline-rich glycoprotein, ABA-dependent inhibition of root growth                         |
| Os05g0488600 | UP   | OsIAA17     | Similar to Auxin-responsive protein IAA17                                                  |
| Os05g0494000 | UP   | OsAT-IV     | Aminotransferase, class IV family protein                                                  |
| Os05g0495600 | DOWN | Os-miR1425  | Hypothetical protein                                                                       |
| Os05g0498900 | DOWN | DIP3        | Similar to Glycosyl hydrolases family 18                                                   |
| Os05g0506200 | DOWN | -           | Conserved hypothetical protein                                                             |
| Os05g0506500 | UP   | -           | Similar to SHR5-receptor-like kinase (Fragment)                                            |
| Os05g0506800 | UP   | -           | Protein kinase, catalytic domain domain containing protein                                 |
| Os05g0511700 | DOWN | -           | Pentatricopeptide repeat domain containing protein                                         |
| Os05g0514600 | UP   | OsPPR920    | Pentatricopeptide repeat domain containing protein                                         |
| Os05g0514800 | UP   | OsLOX7      | Similar to Lipoxygenase (Fragment)                                                         |
| Os05g0515600 | UP   | -           | Pentatricopeptide repeat domain containing protein                                         |
| Os05g0518600 | UP   | -           | Hypothetical protein                                                                       |
| Os05g0519600 | DOWN | SODA1       | Manganese superoxide dismutase, Heat-stress tolerance                                      |
| Os05g0521700 | DOWN | YGL1        | Chl synthase, Chl biosynthesis                                                             |
| Os05g0526600 | DOWN | UspA        | UspA domain containing protein                                                             |
| Os05g0527000 | UP   | -           | Mitochondrial carrier protein domain containing protein                                    |
| Os05g0533800 | UP   | -           | Protein of unknown function DUF538 family protein                                          |
| Os05g0535700 | UP   | OsBBR1      | Nucleotide-binding site leucine-rich repeat (NBS-LRR) protein, Bacterial blight resistance |
| Os05g0535800 | DOWN | -           | Conserved hypothetical protein                                                             |
| Os05g0541301 | UP   | RPS4        | Similar to 40S ribosomal protein S4, X isoform (Single copy abundant mRNA protein) (SCR10) |
| Os05g0549800 | DOWN | OsEXO70 FX1 | Exo70 exocyst complex subunit domain containing protein                                    |

|              |      |         |                                                                                                                                    |
|--------------|------|---------|------------------------------------------------------------------------------------------------------------------------------------|
| Os05g0555600 | DOWN | -       | Non-protein coding transcript                                                                                                      |
| Os05g0555900 | UP   | OsBON3  | Similar to predicted protein                                                                                                       |
| Os05g0557400 | DOWN | OsDJC31 | Tetratricopeptide-like helical domain containing protein                                                                           |
| Os05g0562000 | DOWN | -       | Similar to Acyl carrier protein                                                                                                    |
| Os05g0563400 | DOWN | -       | Hypothetical protein                                                                                                               |
| Os05g0563600 | UP   | -       | Similar to predicted protein                                                                                                       |
| Os05g0567300 | DOWN | OsANN3  | Similar to Annexin-like protein RJ4                                                                                                |
| Os05g0574400 | UP   | -       | Similar to 50S ribosomal protein L1                                                                                                |
| Os05g0574800 | DOWN | -       | Dynamin family protein                                                                                                             |
| Os05g0575300 | DOWN | -       | Conserved hypothetical protein                                                                                                     |
| Os05g0575800 | DOWN | OsVQ19  | Similar to VQ motif family protein                                                                                                 |
| Os05g0578500 | UP   | -       | Conserved hypothetical protein                                                                                                     |
| Os05g0582300 | DOWN | -       | Similar to Ubiquinol-cytochrome c reductase complex 8.0 kDa protein (EC 1.10.2.2)                                                  |
| Os05g0584400 | UP   | GSC     | Similar to Fructose-bisphosphate aldolase, cytoplasmic isozyme (EC 4.1.2.13)                                                       |
| Os05g0586900 | DOWN | -       | Hypothetical conserved gene                                                                                                        |
| Os05g0587300 | DOWN | -       | Inosine/uridine-preferring nucleoside hydrolase domain containing protein                                                          |
| Os05g0594200 | DOWN | -       | Non-protein coding transcript                                                                                                      |
| Os05g0594500 | DOWN | TCD5    | Similar to electron carrier/ oxidoreductase                                                                                        |
| Os06g0103500 | UP   | -       | Conserved hypothetical protein                                                                                                     |
| Os06g0105400 | UP   | OsCc1   | Cytochrome c                                                                                                                       |
| Os06g0106800 | UP   | -       | Similar to Endoglucanase 3                                                                                                         |
| Os06g0111300 | DOWN | -       | Hypothetical protein                                                                                                               |
| Os06g0111500 | UP   | -       | Octicosapeptide/Phox/Bem1p domain containing protein                                                                               |
| Os06g0113900 | DOWN | -       | Phosphatidylinositol transfer protein-like, N-terminal domain containing protein                                                   |
| Os06g0115400 | DOWN | -       | GTP1/OBG domain containing protein                                                                                                 |
| Os06g0116400 | DOWN | -       | Similar to peptide transporter PTR2-B                                                                                              |
| Os06g0116500 | DOWN | -       | Similar to Gibberellin-regulated protein 2 precursor                                                                               |
| Os06g0126500 | UP   | -       | Similar to Actin 1                                                                                                                 |
| Os06g0128600 | DOWN | MID1    | R-R-type MYB-like transcription factor, Response to drought stress during reproductive development                                 |
| Os06g0129400 | UP   | ONAC012 | No apical meristem (NAM) protein domain containing protein                                                                         |
| Os06g0132400 | DOWN | ROS1c   | 5-methylcytosine DNA glycosylase/lyase, Demethylation of retrotransposon Tos17, Promotion of Tos17 transposition, Seed development |
| Os06g0133200 | UP   | ROS1D   | Similar to DNA glycosylase/lyase 701                                                                                               |
| Os06g0133900 | UP   | -       | Homeodomain-like containing protein                                                                                                |
| Os06g0137600 | DOWN | -       | Conserved hypothetical protein                                                                                                     |
| Os06g0138600 | DOWN | -       | Conserved hypothetical protein                                                                                                     |
| Os06g0140700 | UP   | -       | Conserved hypothetical protein                                                                                                     |
| Os06g0146100 | DOWN | -       | Conserved hypothetical protein                                                                                                     |

|              |      |                |                                                                                                                        |
|--------------|------|----------------|------------------------------------------------------------------------------------------------------------------------|
| Os06g0146600 | UP   | -              | Pyruvate decarboxylase (EC 4.1.1.1) (Fragment)                                                                         |
| Os06g0146800 | UP   | -              | Similar to Ser-thr protein kinase (Fragment)                                                                           |
| Os06g0146900 | UP   | OsGRL11        | Similar to electron transporter                                                                                        |
| Os06g0149100 | DOWN | OsZIP5         | Similar to Metal transport protein                                                                                     |
| Os06g0150400 | UP   | OsEXO70<br>B3  | Exo70 exocyst complex subunit family protein                                                                           |
| Os06g0156600 | UP   | OsWRKY7<br>0   | WRKY transcription factor 70                                                                                           |
| Os06g0163200 | DOWN | OsEXP4         | Alpha-expansin OsEXPA4                                                                                                 |
| Os06g0164500 | UP   | -              | Hypothetical conserved gene                                                                                            |
| Os06g0166500 | DOWN | -              | Similar to Phosphate starvation regulator protein (Regulatory protein of P-starvation acclimation response Psr1)       |
| Os06g0167150 | UP   | OsC3'H1        | p-Coumaroyl ester 3-hydroxylase, Determination of lignin content, composition and the degree of cell wall cross-linkin |
| Os06g0167200 | UP   | osACA7         | Similar to autoinhibited calcium ATPase                                                                                |
| Os06g0167400 | UP   | OsRLCK1<br>89  | Serine/threonine protein kinase domain containing protein                                                              |
| Os06g0172000 | DOWN | -              | KOW domain containing protein                                                                                          |
| Os06g0175900 | UP   | OsGELP69       | Conserved hypothetical protein                                                                                         |
| Os06g0177000 | UP   | OsGELP72       | Hypothetical conserved gene                                                                                            |
| Os06g0180666 | UP   | -              | Putative rRNA methylase family protein                                                                                 |
| Os06g0183700 | DOWN | GA2OX4         | GA 2-oxidase4, GA metabolis                                                                                            |
| Os06g0187950 | DOWN | -              | Hypothetical conserved gene                                                                                            |
| Os06g0191800 | UP   | ZRP4           | Similar to O-methyltransferase ZRP4 (EC 2.1.1.-                                                                        |
| Os06g0192800 | DOWN | OsFTL10        | Similar to ZCN12 protein                                                                                               |
| Os06g0194900 | UP   | OsTPS1         | Similar to SL-TPS/P                                                                                                    |
| Os06g0199100 | DOWN | OsDJ-1D        | Similar to 4-methyl-5(B-hydroxyethyl)-thiazol monophosphate biosynthesis enzyme                                        |
| Os06g0200350 | DOWN | -              | Conserved hypothetical protein                                                                                         |
| Os06g0200700 | DOWN | -              | Zinc finger, RING/FYVE/PHD-type domain containing protein                                                              |
| Os06g0202900 | DOWN | OsUGT70<br>6C3 | UDP-glucuronosyl/UDP-glucosyltransferase family protein                                                                |
| Os06g0203000 | DOWN | -              | Similar to hydrogen-transporting ATP synthase, rotational mechanism                                                    |
| Os06g0205250 | UP   | -              | Conserved hypothetical protein                                                                                         |
| Os06g0206900 | UP   | -              | Similar to F14O23.10 protein                                                                                           |
| Os06g0207950 | DOWN | -              | Hypothetical gene                                                                                                      |
| Os06g0208151 | DOWN | OsMYB86-<br>L2 | Similar to Myb-related protein                                                                                         |
| Os06g0215600 | UP   | AP2/EREB<br>P  | -                                                                                                                      |
| Os06g0217700 | DOWN | OsGLT2         | Similar to Glutamate synthase [NADH], amyloplastic                                                                     |

|              |      |            |                                                                                                                        |
|--------------|------|------------|------------------------------------------------------------------------------------------------------------------------|
| Os06g0218900 | DOWN | -          | Non-protein coding transcript                                                                                          |
| Os06g0219400 | DOWN | -          | Membrane attack complex component/perforin/complement C9 family protein                                                |
| Os06g0220000 | UP   | -          | Conserved hypothetical protein                                                                                         |
| Os06g0220500 | UP   | OsARF15    | Similar to Auxin response factor 5                                                                                     |
| Os06g0226000 | UP   | OsFLA6     | FAS1 domain domain containing protein                                                                                  |
| Os06g0228500 | UP   | -          | Protein of unknown function DUF561 family protein                                                                      |
| Os06g0230000 | UP   | -          | Similar to GTP-binding protein era                                                                                     |
| Os06g0233800 | UP   | -          | Similar to 50S ribosomal protein L12, chloroplast precursor (CL12)                                                     |
| Os06g0239100 | DOWN | -          | Similar to Malate dehydrogenase                                                                                        |
| Os06g0241100 | UP   | OsPPR6     | Hypothetical conserved gene                                                                                            |
| Os06g0243100 | UP   | -          | Similar to Translation initiation factor IF-2                                                                          |
| Os06g0244000 | UP   | -          | Hypothetical conserved gene                                                                                            |
| Os06g0245800 | DOWN | OsCCR23    | NAD(P)-binding domain containing protein                                                                               |
| Os06g0246200 | DOWN | OsSPS2     | Similar to prenyl transferase                                                                                          |
| Os06g0248500 | DOWN | -          | Conserved hypothetical protein                                                                                         |
| Os06g0253350 | UP   | -          | Hypothetical conserved gene                                                                                            |
| Os06g0253600 | DOWN | -          | Molecular chaperone, heat shock protein, Hsp40, DnaJ domain containing protein                                         |
| Os06g0255900 | DOWN | OsCAX1b    | Similar to Cation/proton exchanger 1a                                                                                  |
| Os06g0256500 | UP   | -          | Invasin/intimin cell-adhesion domain containing protein                                                                |
| Os06g0266800 | DOWN | ACX1       | Similar to Acyl-coenzyme A oxidase 1, peroxisomal (EC 1.3.3.6) (AOX 1) (Long- chain acyl-CoA oxidase) (AtCX1)          |
| Os06g0272700 | DOWN | -          | Similar to dihydrolipoamide S-acetyltransferase                                                                        |
| Os06g0284500 | DOWN | -          | Similar to glycoside hydrolase, family 28                                                                              |
| Os06g0289300 | UP   | -          | Hypothetical conserved gene                                                                                            |
| Os06g0292400 | DOWN | Os6PGDH1   | Cytosolic 6-phosphogluconate dehydrogenase                                                                             |
| Os06g0294600 | UP   | -          | Major facilitator superfamily, general substrate transporter domain containing protein                                 |
| Os06g0295900 | DOWN | OsFSD1.1   | Similar to Superoxide dismutase [Fe], chloroplast (EC 1.15.1.1) (Fragment)                                             |
| Os06g0306300 | DOWN | ZN         | Nickel/cobalt transporter, high-affinity domain containing protein                                                     |
| Os06g0314501 | DOWN | -          | Pleckstrin homology-type domain containing protein                                                                     |
| Os06g0316800 | DOWN | OsBAG3     | Ubiquitin domain containing protein                                                                                    |
| Os06g0326400 | DOWN | -          | Ankyrin repeat containing protein                                                                                      |
| Os06g0329900 | DOWN | OsSPX-MFS3 | Splicing variant of SPX-MFS protein                                                                                    |
| Os06g0334100 | DOWN | ChlM       | Similar to Magnesium-protoporphyrin O-methyltransferase (EC 2.1.1.11) (Magnesium- protoporphyrin IX methyltransferase) |
| Os06g0335950 | DOWN | -          | Conserved hypothetical protein                                                                                         |
| Os06g0346300 | UP   | EPSPS      | 5-enolpyruvylshikimate-3-phosphate synthas                                                                             |

|              |      |                      |                                                                                          |
|--------------|------|----------------------|------------------------------------------------------------------------------------------|
| Os06g0367100 | DOWN | -                    | K homology-like, alpha/beta domain containing protein                                    |
| Os06g0483500 | DOWN | -                    | Protein of unknown function DUF248, methyltransferase putative domain containing protein |
| Os06g0494400 | DOWN | Oshox2               | Similar to Homeodomain leucine zipper protein (Fragment)                                 |
| Os06g0498900 | DOWN | Pi9(t)               | NB-ARC domain containing protein                                                         |
| Os06g0505202 | DOWN | -                    | Hypothetical protein                                                                     |
| Os06g0505700 | UP   | -                    | Conserved hypothetical protein                                                           |
| Os06g0521900 | DOWN | -                    | Hypothetical protein                                                                     |
| Os06g0536800 | DOWN | OsGELP75             | Similar to mRNA, clone: RTFL01-05-E01                                                    |
| Os06g0538900 | UP   | -                    | Conserved hypothetical protein                                                           |
| Os06g0542300 | DOWN | OsGELP77             | Lipase, GDSL domain containing protein                                                   |
| Os06g0547400 | UP   | OsWRKY1<br>13        | Similar to WRKY transcription factor 63                                                  |
| Os06g0551800 | DOWN | OsPOP11              | Esterase/lipase/thioesterase domain containing protein                                   |
| Os06g0557700 | DOWN | -                    | Conserved hypothetical protein                                                           |
| Os06g0558766 | DOWN | OsIAA20              | Similar to Auxin-responsive protein IAA20 (Indoleacetic acid-induced protein 20)         |
| Os06g0563000 | UP   | -                    | Hypothetical gene                                                                        |
| Os06g0564700 | UP   | -                    | Similar to RING-H2 finger protein ATL1R (RING-H2 finger protein ATL8)                    |
| Os06g0567900 | UP   | -                    | Di-trans-poly-cis-decaprenylcistransferase family protein                                |
| Os06g0569500 | UP   | -                    | Pentatricopeptide repeat domain containing protein                                       |
| Os06g0569900 | DOWN | -                    | Similar to Cytochrome b-c1 complex subunit 8                                             |
| Os06g0577350 | UP   | -                    | Similar to Cytochrome b-c1 complex subunit 8                                             |
| Os06g0579800 | UP   | -                    | Hypothetical gene                                                                        |
| Os06g0581500 | DOWN | -                    | Hypothetical conserved gene                                                              |
| Os06g0587900 | DOWN | -                    | Hypothetical protein                                                                     |
| Os06g0591400 | UP   | OsGLR4.8             | Hypothetical conserved gene                                                              |
| Os06g0592200 | UP   | Os-<br>CYP709C1<br>1 | Cytochrome P450 family protein                                                           |
| Os06g0592400 | UP   | -                    | Similar to RING-H2 finger protein ATL1R (RING-H2 finger protein ATL8)                    |
| Os06g0593100 | UP   | SUS2                 | Sucrose synthase 2 (EC 2.4.1.13)                                                         |
| Os06g0605900 | DOWN | -                    | Helix-turn-helix, AraC type, subdomain 2 domain containing protein                       |
| Os06g0606700 | UP   | -                    | Conserved hypothetical protein                                                           |
| Os06g0612900 | DOWN | -                    | Hypothetical protein                                                                     |
| Os06g0622000 | DOWN | OsRLCK2<br>03        | Serine/threonine protein kinase domain containing protein                                |
| Os06g0626600 | UP   | -                    | Hypothetical protein                                                                     |
| Os06g0632200 | UP   | -                    | Conserved hypothetical protein                                                           |
| Os06g0634700 | DOWN | -                    | Conserved hypothetical protein                                                           |
| Os06g0638700 | DOWN | -                    | Hypothetical gene                                                                        |

|              |      |               |                                                                        |
|--------------|------|---------------|------------------------------------------------------------------------|
| Os06g0639500 | DOWN | -             | Similar to quinone oxidoreductase                                      |
| Os06g0642500 | DOWN | OsOPR5        | Similar to Oxo-phytodienoic acid reductase                             |
| Os06g0644400 | DOWN | -             | Conserved hypothetical protein                                         |
| Os06g0645901 | DOWN | -             | Similar to predicted protein                                           |
| Os06g0648200 | DOWN | -             | GDP-fucose protein O-fucosyltransferase domain containing protein      |
| Os06g0649000 | DOWN | -             | Similar to Phi-1 protein                                               |
| Os06g0656300 | DOWN | -             | UDP-glucuronosyl/UDP-glucosyltransferase family protein                |
| Os06g0662200 | UP   | -             | Similar to Transposase (Fragment)                                      |
| Os06g0664200 | DOWN | OsATL12       | Amino acid transporter, transmembrane domain containing protein        |
| Os06g0671600 | DOWN | -             | Hypothetical conserved gene                                            |
| Os06g0671700 | DOWN | -             | Conserved hypothetical protein                                         |
| Os06g0675700 | UP   | -             | Peptidase M10A and M12B, matrixin and adamalysin family protein        |
| Os06g0676400 | UP   | -             | Protein kinase, core domain containing protein                         |
| Os06g0697000 | UP   | -             | Non-protein coding transcript                                          |
| Os06g0697600 | UP   | -             | Similar to anthranilic acid methyltransferase 3                        |
| Os06g0698600 | DOWN | -             | Similar to Alanyl-tRNA synthetase                                      |
| Os06g0698674 | UP   | -             | Similar to Formin-like protein 14                                      |
| Os06g0698748 | DOWN | OsPUB39       | U box domain containing protein                                        |
| Os06g0704800 | DOWN | -             | Hypothetical gene                                                      |
| Os06g0705400 | UP   | -             | Similar to secretory protein-like                                      |
| Os06g0705600 | UP   | OsEXO70<br>F5 | Conserved hypothetical protein                                         |
| Os06g0707400 | DOWN | Pgi2(Pgib)    | Similar to Glucose-6-phosphate isomerase                               |
| Os06g0710700 | UP   | OsGSR1        | Similar to Gibberellin-stimulated protein                              |
| Os06g0715500 | UP   | -             | Similar to OSIGBa0139J17.1 protein                                     |
| Os06g0724800 | UP   | OsTBL64       | Protein of unknown function DUF231, plant domain containing protein    |
| Os06g0725000 | UP   | OsDof20       | Zinc finger, Dof-type family protein                                   |
| Os06g0725300 | UP   | -             | Hypothetical conserved gene                                            |
| Os06g0726100 | UP   | -             | Embryogenesis transmembrane protein                                    |
| Os06g0728700 | UP   | -             | Cytochrome P450 family protein                                         |
| Os06g0729500 | DOWN | -             | Hypothetical conserved gene                                            |
| Os06g0729800 | DOWN | PRX78         | Haem peroxidase domain containing protein                              |
| Os06g0729900 | DOWN | -             | Conserved hypothetical protein                                         |
| Os06g0731200 | DOWN | -             | Similar to Glycine-rich protein (Fragment)                             |
| Os06g0731300 | DOWN | OsPFPA2       | Phosphofructokinase domain containing protein                          |
| Os06g0731600 | DOWN | -             | SAM dependent carboxyl methyltransferase family protein                |
| Os07g0100300 | DOWN | -             | Hypothetical gene                                                      |
| Os07g0103000 | UP   | OsXTH15       | Concanavalin A-like lectin/glucanase domain containing protein         |
| Os07g0103100 | UP   | -             | Non-protein coding transcript                                          |
| Os07g0107300 | UP   | -             | Similar to ACX4 (ACYL-COA OXIDASE 4); acyl-CoA oxidase/ oxidoreductase |
| Os07g0114000 | DOWN | -             | Similar to Xylanase inhibitor protein I precursor                      |

|              |      |               |                                                                         |
|--------------|------|---------------|-------------------------------------------------------------------------|
| Os07g0117900 | UP   | -             | Glycoside hydrolase, subgroup, catalytic core domain containing protein |
| Os07g0120700 | DOWN | -             | Similar to H0124B04.15 protein                                          |
| Os07g0129200 | UP   | -             | Multi antimicrobial extrusion protein MatE family protein               |
| Os07g0132001 | UP   | -             | GTP-binding protein, HSR1-related domain containing protein             |
| Os07g0133100 | DOWN | -             | Hypothetical conserved gene                                             |
| Os07g0137500 | DOWN | OsAGP26       | Similar to AGP16                                                        |
| Os07g0147700 | DOWN | PRX82         | Plant peroxidase domain containing protein                              |
| Os07g0147800 | DOWN | -             | Hypothetical protein                                                    |
| Os07g0152500 | DOWN | -             | Protein of unknown function DUF538 domain containing protein            |
| Os07g0158300 | DOWN | -             | Heavy metal transport/detoxification protein domain containing protein  |
| Os07g0158400 | UP   | prx86         | Similar to Peroxidase P7 (EC 1.11.1.7) (TP7)                            |
| Os07g0159200 | UP   | -             | Bulb-type lectin domain domain containing protein                       |
| Os07g0160600 | UP   | -             | Protein kinase, catalytic domain domain containing protein              |
| Os07g0162400 | UP   | -             | Similar to predicted protein                                            |
| Os07g0168000 | DOWN | OsMIOX        | Myo-inositol oxygenase, Drought stress toleranc                         |
| Os07g0176600 | UP   | -             | Ndr family protein                                                      |
| Os07g0181100 | DOWN | -             | Similar to Cysteine synthase (EC 4.2.99.8)                              |
| Os07g0182100 | UP   | AO            | L-ascorbate oxidase, Cold, salt, drought stress respons                 |
| Os07g0185000 | UP   | KO4           | Ent-kaurene oxidase, Diterpenoid phytoalexin biosynthesi                |
| Os07g0188233 | DOWN | OsKO1         | Similar to Ent-kaurene oxidase 1 (Fragment)                             |
| Os07g0188249 | DOWN | -             | Hypothetical protein                                                    |
| Os07g0195300 | UP   | -             | Conserved hypothetical protein                                          |
| Os07g0207400 | UP   | -             | Hypothetical conserved gene                                             |
| Os07g0208000 | UP   | -             | Protein kinase, core domain containing protein                          |
| Os07g0213300 | DOWN | -             | Hypothetical conserved gene                                             |
| Os07g0215200 | UP   | -             | Conserved hypothetical protein                                          |
| Os07g0218200 | UP   | -             | Hypothetical protein                                                    |
| Os07g0229700 | DOWN | OsALDH2<br>B2 | Similar to Cytosolic aldehyde dehydrogenase RF2C                        |
| Os07g0236700 | UP   | -             | Similar to UDP-galactose/UDP-glucose transporter                        |
| Os07g0240300 | UP   | OsFbox31<br>6 | Leucine-rich repeat, cysteine-containing subtype containing protein     |
| Os07g0246200 | UP   | -             | Tetratricopeptide-like helical domain containing protein                |
| Os07g0263400 | UP   | -             | Similar to predicted protein                                            |
| Os07g0275100 | DOWN | OsCW-<br>ZF6  | Zinc finger, CW-type domain containing protein                          |
| Os07g0282300 | DOWN | -             | Sulfotransferase family protein                                         |
| Os07g0283125 | UP   | TS            | Similar to tryptophan synthase-related                                  |
| Os07g0287000 | DOWN | -             | Conserved hypothetical protein                                          |
| Os07g0297400 | UP   | OsCYL2        | Putative cyclase family protein                                         |
| Os07g0416700 | DOWN | -             | Protein kinase, core domain containing protein                          |

|              |      |            |                                                                                                                                    |
|--------------|------|------------|------------------------------------------------------------------------------------------------------------------------------------|
| Os07g0418500 | UP   | -          | Cytochrome P450 domain containing protein                                                                                          |
| Os07g0421932 | DOWN | -          | Non-protein coding transcript                                                                                                      |
| Os07g0438500 | DOWN | -          | Similar to Transcription initiation factor TFIID subunit 1                                                                         |
| Os07g0438700 | UP   | -          | Conserved hypothetical protein                                                                                                     |
| Os07g0445600 | UP   | WRKY28     | PAMP (pathogen-associated molecular pattern)-responsive transrepressor, Defense respons                                            |
| Os07g0448800 | UP   | -          | Uncharacterised protein family UPF0497, trans-membrane plant subgroup domain containing protein                                    |
| Os07g0449100 | UP   | OsbZIP52   | Basic leucine zipper (bZIP) transcription factor, Negative regulator of cold and drought stress respons                            |
| Os07g0450000 | UP   | -          | Inositol monophosphatase/Fructose-1,6-bisphosphatase domain containing protein                                                     |
| Os07g0452801 | DOWN | Os-SAUR26  | Beta tubulin, autoregulation binding site domain containing protein                                                                |
| Os07g0464200 | DOWN | -          | Similar to toprim domain-containing protein                                                                                        |
| Os07g0464600 | DOWN | -          | Similar to High pI alpha-glucosidase                                                                                               |
| Os07g0469200 | DOWN | -          | Conserved hypothetical protein                                                                                                     |
| Os07g0471300 | DOWN | -          | Similar to 50S ribosomal protein L24, chloroplast precursor (CL24)                                                                 |
| Os07g0471900 | UP   | OsXTH10    | Similar to Xyloglucan endo-transglucosylase/hydrolase 1                                                                            |
| Os07g0480300 | UP   | -          | ATPase, AAA-type, core domain containing protein                                                                                   |
| Os07g0490400 | DOWN | OsEXO70 G2 | Exo70 exocyst complex subunit family protein                                                                                       |
| Os07g0491500 | DOWN | -          | eIF4-gamma/eIF5/eIF2-epsilon domain containing protein                                                                             |
| Os07g0492000 | UP   | -          | Similar to cDNA clone:J023083M02, full insert sequence                                                                             |
| Os07g0496250 | UP   | -          | Tautomerase domain containing protein                                                                                              |
| Os07g0498400 | DOWN | -          | Conserved hypothetical protein                                                                                                     |
| Os07g0510400 | DOWN | OsHAC70 4  | Probable histone acetyltransferase HAC-like 2                                                                                      |
| Os07g0511500 | DOWN | OsLTP2.6   | Hypothetical conserved gene                                                                                                        |
| Os07g0515200 | UP   | -          | Oligopeptide transporter domain containing protein                                                                                 |
| Os07g0518500 | DOWN | -          | Similar to NBS-LRR disease resistance protein homologue                                                                            |
| Os07g0519600 | UP   | -          | Conserved hypothetical protein                                                                                                     |
| Os07g0523100 | DOWN | -          | Similar to Benzoyl coenzyme A: benzyl alcohol benzoyl transferase (Benzoyl-CoA:benzyl alcohol/phenylethanol benzoyltransferase)    |
| Os07g0523150 | DOWN | -          | Similar to Translocon-associated protein alpha subunit precursor (TRAP-alpha) (Signal sequence receptor alpha subunit) (SSR-alpha) |
| Os07g0524900 | UP   | -          | Similar to Chaperone protein dnaJ                                                                                                  |
| Os07g0527000 | DOWN | OsbHLH1 55 | Basic helix-loop-helix dimerisation region bHLH domain containing protein                                                          |
| Os07g0528200 | DOWN | OsStr9     | Similar to Senescence-associated protein DIN1                                                                                      |
| Os07g0530400 | DOWN | -          | Barwin-related endoglucanase domain containing protein                                                                             |

|              |      |           |                                                                                                       |
|--------------|------|-----------|-------------------------------------------------------------------------------------------------------|
| Os07g0534000 | DOWN | Cht3*     | Similar to Seed chitinase-c                                                                           |
| Os07g0534300 | UP   | -         | Homeodomain-like containing protein                                                                   |
| Os07g0534700 | UP   | -         | Protein of unknown function DUF789 domain containing protein                                          |
| Os07g0539300 | UP   | OsIPT10   | Hypothetical gene                                                                                     |
| Os07g0545800 | DOWN | -         | Similar to LysM domain containing protein                                                             |
| Os07g0548300 | DOWN | OsA-BCG16 | Similar to ABC transporter-like protein                                                               |
| Os07g0550500 | UP   | -         | Surface protein from Gram-positive cocci, anchor region domain containing protein                     |
| Os07g0558100 | UP   | -         | ARID/BRIGHT DNA-binding domain domain containing protein                                              |
| Os07g0560100 | DOWN | SQD2.1    | Conserved hypothetical protein                                                                        |
| Os07g0565400 | DOWN | -         | Similar to GRF zinc finger family protein, expressed                                                  |
| Os07g0565600 | DOWN | OsGLR3.6  | Similar to Glutamate receptor 3.4 precursor (Ligand-gated ion channel 3.4) (AtGLR4). Splice isoform 2 |
| Os07g0566150 | DOWN | -         | Plant disease resistance response protein family protein                                              |
| Os07g0567700 | DOWN | -         | Conserved hypothetical protein                                                                        |
| Os07g0572100 | UP   | OsPP2C61  | Similar to Protein phosphatase 2C-like                                                                |
| Os07g0573200 | DOWN | -         | NB-ARC domain containing protein                                                                      |
| Os07g0573700 | DOWN | -         | Conserved hypothetical protein                                                                        |
| Os07g0573900 | DOWN | PR1A      | Pathogenesis-related 1a protein, Regulation of abiotic stress response                                |
| Os07g0577700 | UP   | -         | Non-protein coding transcript                                                                         |
| Os07g0578333 | DOWN | -         | Concanavalin A-like lectin/glucanase, subgroup domain containing protein                              |
| Os07g0586200 | DOWN | -         | Transposase, MuDR, plant domain containing protein                                                    |
| Os07g0587500 | DOWN | PsbR      | Similar to Photosystem II 10 kDa polypeptide, chloroplast precursor                                   |
| Os07g0590600 | DOWN | -         | ATPase, BadF/BadG/BcrA/BcrD type domain containing protein                                            |
| Os07g0593400 | UP   | -         | Hypothetical conserved gene                                                                           |
| Os07g0597400 | UP   | -         | Similar to H0315A08.1 protein                                                                         |
| Os07g0607400 | UP   | -         | Similar to RNA binding protein                                                                        |
| Os07g0614000 | DOWN | -         | Hypothetical conserved gene                                                                           |
| Os07g0614700 | UP   | -         | Conserved hypothetical protein                                                                        |
| Os07g0616200 | DOWN | OsFLA16   | FAS1 domain domain containing protein                                                                 |
| Os07g0617800 | UP   | OsCDAP1   | Alpha/beta hydrolase fold-3 domain containing protein                                                 |
| Os07g0619100 | DOWN | -         | Similar to Polyribonucleotide phosphorylase (Fragment)                                                |
| Os07g0621600 | UP   | OsNek3    | Serine/threonine protein kinase, Never-in-mitosis A (NIMA)-related kinase, Pollen germination         |
| Os07g0622700 | UP   | SLAC      | C4-dicarboxylate transporter/malic acid transport protein family protein                              |
| Os07g0625400 | UP   | OsTSA     | Similar to Tryptophan synthase alpha chain                                                            |
| Os07g0626700 | DOWN | OsWINK3   | Similar to MAP kinase (Ser/Thr kinase)                                                                |
| Os07g0626800 | DOWN | -         | Conserved hypothetical protein                                                                        |
| Os07g0627100 | UP   | -         | Non-protein coding transcript                                                                         |

|              |      |                 |                                                                                                                                                                    |
|--------------|------|-----------------|--------------------------------------------------------------------------------------------------------------------------------------------------------------------|
| Os07g0628700 | DOWN | OsFbox34<br>7   | Hypothetical conserved gene                                                                                                                                        |
| Os07g0631300 | UP   | -               | Similar to RF12 protein (Fragment)                                                                                                                                 |
| Os07g0631900 | DOWN | -               | Similar to 40S ribosomal protein S15A                                                                                                                              |
| Os07g0638400 | UP   | -               | Pentatricopeptide repeat domain containing protein                                                                                                                 |
| Os07g0642200 | UP   | -               | Conserved hypothetical protein                                                                                                                                     |
| Os07g0642800 | DOWN | TPS3            | Similar to terpene synthase 7                                                                                                                                      |
| Os07g0643400 | UP   | OsTFIIS         | Similar to DNA-directed RNA polymerase I subunit 12 (EC 2.7.7.6) (Nuclear RNA polymerase I small specific subunit Rpa12) (Zinc ribbon domain containing protein 1) |
| Os07g0643700 | UP   | OsDof21         | Zinc finger, Dof-type domain containing protein                                                                                                                    |
| Os07g0643800 | UP   | -               | Similar to OSIGBa0153E02-OSIGBa0093I20.13 protein                                                                                                                  |
| Os07g0645000 | UP   | CRO1            | Similar to Calreticulin (Fragment)                                                                                                                                 |
| Os07g0646100 | UP   | -               | Similar to oxidoreductase family protein                                                                                                                           |
| Os07g0650100 | UP   | -               | Similar to predicted protein                                                                                                                                       |
| Os07g0656900 | UP   | OsAAO3          | Similar to Aldehyde oxidase 1 homolog (Fragment)                                                                                                                   |
| Os07g0664400 | UP   | -               | Similar to lectin-like receptor kinase 7                                                                                                                           |
| Os07g0669200 | DOWN | OsFbox36<br>7   | Cyclin-like F-box domain containing protein                                                                                                                        |
| Os07g0669250 | DOWN | -               | Conserved hypothetical protein                                                                                                                                     |
| Os07g0669700 | DOWN | OsFAD2-4        | Conserved hypothetical protein                                                                                                                                     |
| Os07g0669800 | DOWN | Os-<br>CYP709C9 | Similar to Cytochrome P450                                                                                                                                         |
| Os07g0673400 | DOWN | OsRePRP2<br>.2  | Proline-rich glycoprotein, ABA-dependent inhibition of root growth                                                                                                 |
| Os07g0674100 | UP   | -               | Hypothetical gene                                                                                                                                                  |
| Os07g0676900 | UP   | OsCesA3         | Similar to Cellulose synthase-7                                                                                                                                    |
| Os07g0677500 | DOWN | -               | Octicosapeptide/Phox/Bem1p domain containing protein                                                                                                               |
| Os07g0680400 | DOWN | -               | Hypothetical conserved gene                                                                                                                                        |
| Os07g0680600 | DOWN | -               | Conserved hypothetical protein                                                                                                                                     |
| Os07g0680800 | DOWN | OsPIP2a         | Aquaporin                                                                                                                                                          |
| Os07g0681400 | DOWN | -               | Similar to Light induced protein like                                                                                                                              |
| Os07g0686400 | DOWN | -               | Similar to 60S ribosomal protein L44                                                                                                                               |
| Os07g0689400 | DOWN | -               | Conserved hypothetical protein                                                                                                                                     |
| Os07g0689950 | DOWN | -               | Similar to O-methyltransferase ZRP4                                                                                                                                |
| Os07g0690900 | DOWN | OsA-<br>BCB26   | ABC transporter-like domain containing protein                                                                                                                     |
| Os07g0691800 | UP   | -               | Similar to predicted protein                                                                                                                                       |
| Os07g0694700 | UP   | OsAGO18         | Similar to Protein argonaute 18                                                                                                                                    |
| Os07g0695400 | DOWN | OsbHLH0<br>77   | Helix-loop-helix DNA-binding domain containing protein                                                                                                             |

|              |      |            |                                                                           |
|--------------|------|------------|---------------------------------------------------------------------------|
| Os08g0106300 | UP   | -          | Hypothetical conserved gene                                               |
| Os08g0110400 | DOWN | OsFKBP20-2 | Peptidyl-prolyl cis-trans isomerase, FKBP-type domain containing protein  |
| Os08g0111300 | DOWN | -          | Hypothetical conserved gene                                               |
| Os08g0112300 | UP   | OsNDPK1    | Nucleoside diphosphate kinase, Cell elongation process in coleoptil       |
| Os08g0113100 | UP   | -          | Similar to Expansin-like B1                                               |
| Os08g0117100 | DOWN | -          | Leucine-rich repeat, typical subtype domain containing protein            |
| Os08g0137900 | DOWN | -          | UDP-glucuronosyl/UDP-glucosyltransferase family protein                   |
| Os08g0138100 | DOWN | -          | Hypothetical protein                                                      |
| Os08g0138700 | UP   | -          | Zinc finger, RING/FYVE/PHD-type domain containing protein                 |
| Os08g0138900 | UP   | -          | Conserved hypothetical protein                                            |
| Os08g0153900 | UP   | -          | Similar to taxane 10-beta-hydroxylase                                     |
| Os08g0154300 | DOWN | -          | Similar to taxane 10-beta-hydroxylase                                     |
| Os08g0155400 | UP   | -          | Similar to 60S ribosomal protein L44                                      |
| Os08g0158200 | UP   | -          | Similar to 60S ribosomal protein L44                                      |
| Os08g0162800 | UP   | -          | Protein of unknown function DUF6, transmembrane domain containing protein |
| Os08g0173300 | DOWN | -          | Similar to nodulin-like protein                                           |
| Os08g0175600 | DOWN | -          | Conserved hypothetical protein                                            |
| Os08g0176200 | DOWN | Os_F0782   | Ribosomal protein S14, conserved site domain containing protein           |
| Os08g0182400 | UP   | -          | Similar to permeases of the major facilitator superfamily                 |
| Os08g0183900 | DOWN | -          | Hypothetical conserved gene                                               |
| Os08g0185300 | UP   | -          | Serine/threonine protein kinase-related domain containing protein         |
| Os08g0185701 | DOWN | -          | Similar to hydrolase, hydrolyzing O-glycosyl compounds                    |
| Os08g0186200 | DOWN | Gns13      | Glycoside hydrolase, family 17 protein                                    |
| Os08g0187800 | UP   | CIGR1      | Similar to Chitin-inducible gibberellin-responsive protein                |
| Os08g0189500 | UP   | -          | Hypothetical conserved gene                                               |
| Os08g0191100 | UP   | -          | Hypothetical conserved gene                                               |
| Os08g0191433 | DOWN | OsMyb7     | Similar to Myb-related transcription factor LBM1                          |
| Os08g0191900 | DOWN | -          | Conserved hypothetical protein                                            |
| Os08g0201100 | UP   | -          | Similar to SRF8 (STRUBBELIG-RECEPTOR FAMILY 8)                            |
| Os08g0202300 | DOWN | OsCYP37    | Similar to predicted protein                                              |
| Os08g0203300 | DOWN | -          | Hypothetical conserved gene                                               |
| Os08g0203400 | DOWN | -          | Similar to SCARECROW                                                      |
| Os08g0206700 | DOWN | DAO        | Similar to Amine oxidase like protein (EC 1.4.3.6) (Copper amine oxidase) |
| Os08g0215300 | DOWN | -          | Similar to F20D23.3 protein                                               |
| Os08g0224300 | DOWN | -          | Similar to Adenylyl-sulfate kinase                                        |
| Os08g0229601 | DOWN | -          | Nucleotide-sugar transporter family protein                               |
| Os08g0232700 | DOWN | OsAGP27    | Hypothetical conserved gene                                               |
| Os08g0240200 | DOWN | -          | Succinyl-CoA synthetase-like domain containing protein                    |
| Os08g0240500 | DOWN | -          | Conserved hypothetical protein                                            |

|              |      |          |                                                                                                              |
|--------------|------|----------|--------------------------------------------------------------------------------------------------------------|
| Os08g0254500 | DOWN | OsGELP92 | Similar to Esterase precursor (EC 3.1.1.-) (Early nodule-specific protein homolog) (Latex allergen Hev b 13) |
| Os08g0265000 | DOWN | -        | Armadillo-like helical domain containing protein                                                             |
| Os08g0266400 | DOWN | -        | Tetratricopeptide-like helical domain containing protein                                                     |
| Os08g0269700 | DOWN | -        | Similar to golgi transport 1 protein B                                                                       |
| Os08g0272000 | UP   | -        | Conserved hypothetical protein                                                                               |
| Os08g0275200 | UP   | OsPME20  | Pectin lyase fold/virulence factor domain containing protein                                                 |
| Os08g0277200 | UP   | OsSTRL12 | Six-bladed beta-propeller, TolB-like domain containing protein                                               |
| Os08g0278900 | UP   | OsSPX6   | SPX, N-terminal domain containing protein                                                                    |
| Os08g0293100 | DOWN | -        | Similar to Beta-ketoacyl-ACP synthase                                                                        |
| Os08g0296900 | DOWN | OsAlaAT3 | Similar to Alanine aminotransferase                                                                          |
| Os08g0297800 | UP   | -        | Protein of unknown function DUF827, plant family protein                                                     |
| Os08g0298700 | UP   | -        | Non-protein coding transcript                                                                                |
| Os08g0320400 | UP   | -        | Alpha/beta hydrolase fold-1 domain containing protein                                                        |
| Os08g0323600 | DOWN | OSK28    | SKP1 component domain containing protein                                                                     |
| Os08g0330900 | UP   | -        | Similar to Peroxidase (EC 1.11.1.7)                                                                          |
| Os08g0331000 | UP   | -        | Amine oxidase domain containing protein                                                                      |
| Os08g0332700 | DOWN | -        | MULE transposase, conserved domain domain containing protein                                                 |
| Os08g0334900 | UP   | -        | Similar to Receptor protein kinase                                                                           |
| Os08g0339200 | UP   | -        | Similar to KI domain interacting kinase 1                                                                    |
| Os08g0351300 | DOWN | -        | Conserved hypothetical protein                                                                               |
| Os08g0359200 | DOWN | -        | Nucleotide-binding, alpha-beta plait domain containing protein                                               |
| Os08g0360300 | DOWN | -        | HAD-superfamily hydrolase, subfamily IA, variant 3 domain containing protein                                 |
| Os08g0371200 | UP   | OsMYB86  | Hypothetical conserved gene                                                                                  |
| Os08g0375400 | UP   | Os1-Cys  | Similar to 1-Cys peroxiredoxin                                                                               |
| Os08g0378000 | DOWN | OsGELP93 | Lipase, GDSL domain containing protein                                                                       |
| Os08g0386200 | DOWN | -        | Similar to plectin-related                                                                                   |
| Os08g0387050 | UP   | -        | Alpha/beta hydrolase fold-3 domain containing protein                                                        |
| Os08g0389700 | UP   | -        | Alpha/beta hydrolase fold-3 domain containing protein                                                        |
| Os08g0392500 | DOWN | -        | Similar to Dirigent protein                                                                                  |
| Os08g0398350 | DOWN | -        | Allergen V5/Tpx-1 related family protein                                                                     |
| Os08g0400200 | DOWN | OsPP2C65 | Similar to predicted protein                                                                                 |
| Os08g0411000 | DOWN | -        | Armadillo-like helical domain containing protein                                                             |
| Os08g0413850 | DOWN | OsSCP40  | Similar to Serine carboxypepsidase (Fragment)                                                                |
| Os08g0423600 | DOWN | -        | Short-chain dehydrogenase/reductase SDR domain containing protein                                            |
| Os08g0423850 | DOWN | OsObgC1  | Similar to GTP1/OBG family protein                                                                           |
| Os08g0425500 | UP   | -        | Similar to predicted protein                                                                                 |
| Os08g0425700 | UP   | OsHAK7   | Potassium transporter 4 (AtPOT4) (AtKUP3) (AtKT4)                                                            |
| Os08g0429200 | UP   | OsCW-ZF7 | Zinc finger, CW-type domain containing protein                                                               |

|              |      |            |                                                                                                                                  |
|--------------|------|------------|----------------------------------------------------------------------------------------------------------------------------------|
| Os08g0433300 | DOWN | OsUsp1     | Rossmann-like alpha/beta/alpha sandwich fold domain containing protein                                                           |
| Os08g0434100 | UP   | OsUXS6     | Hypothetical conserved gene                                                                                                      |
| Os08g0434632 | UP   | prx109     | Similar to Peroxidase (EC 1.11.1.7)                                                                                              |
| Os08g0439600 | DOWN | POX3006    | Similar to Peroxidase precursor (EC 1.11.1.7)                                                                                    |
| Os08g0442400 | DOWN | PRX115     | Similar to Cationic peroxidase                                                                                                   |
| Os08g0445700 | DOWN | WRKY47     | WRKY transcription factor, Drought toleranc                                                                                      |
| Os08g0450700 | DOWN | -          | Protein of unknown function DUF3133 domain containing protein                                                                    |
| Os08g0457400 | DOWN | -          | Hypothetical protein                                                                                                             |
| Os08g0461600 | DOWN | OsCML24    | Similar to Calcium-binding protein CAST                                                                                          |
| Os08g0465800 | DOWN | ONAC015    | Similar to NAM / CUC2-like protein                                                                                               |
| Os08g0474866 | UP   | -          | Conserved hypothetical protein                                                                                                   |
| Os08g0475400 | UP   | OsPOP17    | Similar to predicted protein                                                                                                     |
| Os08g0480000 | UP   | -          | BRCT domain containing protein                                                                                                   |
| Os08g0482600 | DOWN | -          | Glycosyl-phosphatidyl inositol-anchored, plant domain containing protein                                                         |
| Os08g0484100 | DOWN | TBPOs-2    | Similar to 26S proteasome subunit 4-like protein (26S proteasome subunit AtRPT2a)                                                |
| Os08g0487900 | DOWN | APX2       | Ascorbate peroxidase, ROS homeostasis, Chloroplast protection, Carbohydrate metabolism, Plant architecture, Fertility maintenanc |
| Os08g0490100 | DOWN | -          | KIP1-like domain containing protein                                                                                              |
| Os08g0490900 | DOWN | -          | Similar to ZIP transporter                                                                                                       |
| Os08g0491000 | DOWN | -          | Non-protein coding transcript                                                                                                    |
| Os08g0499300 | DOWN | -          | Similar to Cytochrome P450                                                                                                       |
| Os08g0502700 | DOWN | -          | Protein of unknown function DUF266, plant family protein                                                                         |
| Os08g0505200 | UP   | -          | Transferase family protein                                                                                                       |
| Os08g0508000 | UP   | -          | Transferase domain containing protein                                                                                            |
| Os08g0508100 | DOWN | OsFKII     | Similar to Fructokinase (Fragment)                                                                                               |
| Os08g0509200 | UP   | -          | Nucleotide-binding, alpha-beta plait domain containing protein                                                                   |
| Os08g0510300 | DOWN | OsUCL25    | Similar to Chemocyanin precursor (Basic blue protein) (Plantacyanin)                                                             |
| Os08g0512700 | UP   | OsUCL26    | Similar to blue copper protein                                                                                                   |
| Os08g0515600 | DOWN | OsRLCK245  | Serine/threonine protein kinase-related domain containing protein                                                                |
| Os08g0515800 | DOWN | -          | Conserved hypothetical protein                                                                                                   |
| Os08g0517150 | UP   | -          | Protein of unknown function DUF599 family protein                                                                                |
| Os08g0519700 | DOWN | -          | Aldolase-type TIM barrel domain containing protein                                                                               |
| Os08g0520550 | DOWN | Os-NRT1.1A | Similar to Nitrate/chlorate transporter                                                                                          |
| Os08g0521000 | UP   | ROMT9      | Caffeic acid O-methyltransferase, Flavonoid 3'-O-methyltransferase, Melatonin biosynthesis, Tricin biosynthesi                   |
| Os08g0525700 | DOWN | -          | FAD linked oxidase, N-terminal domain containing protein                                                                         |
| Os08g0526100 | DOWN | CSLF6      | MLG (mixed-linkage glucan) synthase, Biosynthesis of MLG (cell wall polysaccharide)                                              |

|              |      |                |                                                                                                             |
|--------------|------|----------------|-------------------------------------------------------------------------------------------------------------|
| Os08g0529100 | UP   | OsACBP1        | Acyl-CoA-binding protein , Stress respons                                                                   |
| Os08g0531000 | UP   | OsPRO-PEP3     | Small peptides, Anti-herbivore defense response, Response to wounding and oral secretio                     |
| Os08g0541300 | DOWN | -              | Similar to PolI-like DNA polymerase                                                                         |
| Os08g0544400 | UP   | ORK1           | Serine/threonine protein kinase-related domain containing protein                                           |
| Os08g0546100 | UP   | -              | Conserved hypothetical protein                                                                              |
| Os08g0547200 | UP   | OsCCR29        | Similar to dihydroflavonol-4-reductase                                                                      |
| Os08g0550500 | UP   | -              | Conserved hypothetical protein                                                                              |
| Os08g0553500 | DOWN | -              | Non-protein coding transcript                                                                               |
| Os08g0553700 | DOWN | -              | Hypothetical conserved gene                                                                                 |
| Os08g0556300 | DOWN | OsGPT1         | Similar to Glucose-6-phosphate/phosphate-translocator precursor                                             |
| Os08g0556900 | UP   | GLP8-6         | Germin-like protein 8-6, Disease resistanc                                                                  |
| Os09g0116900 | DOWN | OsACO1         | Similar to Iron-responsive element binding protein (Fragment)                                               |
| Os09g0130800 | DOWN | SSIIIA         | Starch synthase, Starch biosynthesi                                                                         |
| Os09g0132900 | UP   | -              | Pentatricopeptide repeat domain containing protein                                                          |
| Os09g0135800 | DOWN | -              | Conserved hypothetical protein                                                                              |
| Os09g0248100 | UP   | -              | Hypothetical conserved gene                                                                                 |
| Os09g0262000 | UP   | -              | Similar to SHR5-receptor-like kinase (Fragment)                                                             |
| Os09g0264400 | UP   | SHR5           | Protein kinase, core domain containing protein                                                              |
| Os09g0268800 | DOWN | -              | DNA-binding, integrase-type domain containing protein                                                       |
| Os09g0272000 | UP   | -              | Conserved hypothetical protein                                                                              |
| Os09g0272900 | DOWN | ARE1           | Determination of the grain yield, Modulation of nitrogen utilizatio                                         |
| Os09g0273950 | DOWN | -              | Hypothetical conserved gene                                                                                 |
| Os09g0275400 | UP   | OsEXO70<br>FX4 | Exo70 exocyst complex subunit family protein                                                                |
| Os09g0276600 | DOWN | OsXTH17        | Xyloglucan endotransglycosylase/hydrolase protein 8 precursor (EC 2.4.1.207)<br>(End-xyloglucan transferase |
| Os09g0279500 | DOWN | -              | Conserved hypothetical protein                                                                              |
| Os09g0290900 | DOWN | OsXTH4         | Glycoside hydrolase, family 16 domain containing protein                                                    |
| Os09g0298100 | UP   | -              | Similar to Preprotein translocase secY subunit, chloroplast precursor (CpSecY)                              |
| Os09g0305300 | UP   | -              | Conserved hypothetical protein                                                                              |
| Os09g0316000 | UP   | -              | Hypothetical gene                                                                                           |
| Os09g0326900 | UP   | -              | Leucine-rich repeat, N-terminal domain containing protein                                                   |
| Os09g0327575 | DOWN | -              | Conserved hypothetical protein                                                                              |
| Os09g0328332 | UP   | -              | Similar to GAG1At protein                                                                                   |
| Os09g0328800 | UP   | -              | Protein kinase, core domain containing protein                                                              |
| Os09g0329200 | UP   | OsCCR          | Similar to Cinnamoyl-CoA reductase (EC 1.2.1.44)                                                            |
| Os09g0330000 | DOWN | -              | MIR domain containing protein                                                                               |
| Os09g0337500 | DOWN | -              | Conserved hypothetical protein                                                                              |
| Os09g0341500 | DOWN | -              | Tetratricopeptide-like helical domain containing protein                                                    |
| Os09g0344800 | UP   | -              | Sulfotransferase family protein                                                                             |

|              |      |            |                                                                       |
|--------------|------|------------|-----------------------------------------------------------------------|
| Os09g0351800 | DOWN | -          | Similar to male sterility protein 2                                   |
| Os09g0354900 | UP   | -          | Similar to Indole-3-glycerol phosphate synthase-like                  |
| Os09g0356000 | DOWN | -          | Hypothetical conserved gene                                           |
| Os09g0356200 | DOWN | Os_F0451   | Conserved hypothetical protein                                        |
| Os09g0369400 | DOWN | -          | Conserved hypothetical protein                                        |
| Os09g0382400 | DOWN | -          | Conserved hypothetical protein                                        |
| Os09g0386200 | DOWN | -          | Xyloglucan fucosyltransferase family protein                          |
| Os09g0387000 | UP   | -          | Uncharacterized conserved protein UCP016210 domain containing protein |
| Os09g0394600 | UP   | -          | Hypothetical conserved gene                                           |
| Os09g0396900 | UP   | -          | Conserved hypothetical protein                                        |
| Os09g0400500 | DOWN | -          | Protein of unknown function DUF247, plant family protein              |
| Os09g0410125 | DOWN | OsZIP65    | Conserved hypothetical protein                                        |
| Os09g0410400 | DOWN | -          | Non-protein coding transcript                                         |
| Os09g0412700 | UP   | -          | Hypothetical gene                                                     |
| Os09g0413300 | DOWN | -          | Calmodulin binding protein-like domain containing protein             |
| Os09g0415700 | UP   | -          | Carotenoid oxygenase domain containing protein                        |
| Os09g0418000 | DOWN | -          | Plant disease resistance response protein family protein              |
| Os09g0421700 | UP   | -          | Conserved hypothetical protein                                        |
| Os09g0422500 | UP   | OsWRKY69   | WRKY transcription factor 69                                          |
| Os09g0425300 | UP   | -          | Conserved hypothetical protein                                        |
| Os09g0425900 | DOWN | -          | Conserved hypothetical protein                                        |
| Os09g0426100 | UP   | -          | Hypothetical conserved gene                                           |
| Os09g0431600 | DOWN | OsABCA5    | Similar to ABC transporter family, cholesterol/phospholipid flippase  |
| Os09g0432300 | UP   | OsSET30    | Similar to SET domain protein                                         |
| Os09g0433800 | DOWN | -          | Prephenate dehydratase domain containing protein                      |
| Os09g0447000 | DOWN | -          | Protein of unknown function DUF1262 domain containing protein         |
| Os09g0449800 | UP   | -          | Conserved hypothetical protein                                        |
| Os09g0451000 | DOWN | OsalphaCA4 | Similar to carbonic anhydrase                                         |
| Os09g0451500 | UP   | -          | Non-protein coding transcript                                         |
| Os09g0456700 | UP   | -          | Endonuclease/exonuclease/phosphatase domain containing protein        |
| Os09g0459800 | UP   | OsANN7     | Similar to Annexin-like protein                                       |
| Os09g0461700 | UP   | -          | Non-protein coding transcript                                         |
| Os09g0463300 | DOWN | -          | Sialidase domain containing protein                                   |
| Os09g0469300 | UP   | OsRNS3     | Similar to S-like ribonuclease (RNase PD2) (Fragment)                 |
| Os09g0477900 | DOWN | OsCslA11   | Conserved hypothetical protein                                        |
| Os09g0479900 | UP   | -          | Protein of unknown function DUF868, plant family protein              |
| Os09g0482800 | UP   | AP2/EREBP  | -                                                                     |

|              |      |             |                                                                                                                       |
|--------------|------|-------------|-----------------------------------------------------------------------------------------------------------------------|
| Os09g0484200 | UP   | OsTPS8      | Class II trehalose-phosphate-synthase (TPS) gene family member, Salt stress tolerance, Control of yield-related trait |
| Os09g0486375 | DOWN | -           | Chaperonin Cpn60/TCP-1 family protein                                                                                 |
| Os09g0486500 | DOWN | OsRLCK255   | Similar to Avr9/Cf-9 induced kinase 1                                                                                 |
| Os09g0491100 | UP   | -           | Zinc finger, CCHC-type domain containing protein                                                                      |
| Os09g0491740 | UP   | OsGAD1      | Similar to Glutamate decarboxylase                                                                                    |
| Os09g0491772 | UP   | OsAl-phaCA6 | Similar to Nectarin III                                                                                               |
| Os09g0497000 | UP   | OsREM5.2    | Remorin, C-terminal region domain containing protein                                                                  |
| Os09g0501200 | UP   | -           | Similar to gibberellin receptor GID1L2                                                                                |
| Os09g0505300 | DOWN | -           | Alpha/beta hydrolase fold-3 domain containing protein                                                                 |
| Os09g0508900 | DOWN | -           | Multi antimicrobial extrusion protein MatE family protein                                                             |
| Os09g0509200 | UP   | OsUCL29     | Cupredoxin domain containing protein                                                                                  |
| Os09g0518200 | UP   | -           | Similar to predicted protein                                                                                          |
| Os09g0520550 | DOWN | -           | Esterase/lipase/thioesterase domain containing protein                                                                |
| Os09g0520800 | UP   | OsDof24     | Similar to PBF protein                                                                                                |
| Os09g0522200 | DOWN | -           | Similar to Histone H2B.2                                                                                              |
| Os09g0523200 | DOWN | -           | Hypothetical conserved gene                                                                                           |
| Os09g0526300 | DOWN | -           | Myb/SANT-like domain domain containing protein                                                                        |
| Os09g0530500 | DOWN | OsWRKY30    | WRKY transcription factor 30                                                                                          |
| Os09g0539000 | UP   | -           | Pyridoxal phosphate-dependent transferase, major region, subdomain 1 domain containing protein                        |
| Os09g0539800 | UP   | -           | tRNA-binding arm domain containing protein                                                                            |
| Os09g0541500 | UP   | CYP76M2     | Cytochrome P450 family protein                                                                                        |
| Os09g0547500 | DOWN | -           | Conserved hypothetical protein                                                                                        |
| Os09g0555100 | UP   | Os8bglu27   | Similar to Beta-primeverosidase (EC 3.2.1.149)                                                                        |
| Os09g0555150 | UP   | Os8bglu28   | Similar to Amygdalin hydrolase isoform AH I precursor (EC 3.2.1.117)                                                  |
| Os09g0555800 | UP   | OsHAK26     | Potassium uptake protein, kup domain containing protein                                                               |
| Os09g0556000 | UP   | HMGR        | Similar to 3-hydroxy-3-methylglutaryl coenzyme A reductase (EC 1.1.1.34) (Fragment)                                   |
| Os09g0556500 | DOWN | -           | Non-protein coding transcript                                                                                         |
| Os09g0563250 | UP   | -           | Mitochondrial transcription termination factor-related family protein                                                 |
| Os09g0563800 | DOWN | -           | Non-protein coding transcript                                                                                         |
| Os09g0564000 | UP   | -           | Protein of unknown function DUF630 domain containing protein                                                          |
| Os09g0564800 | DOWN | -           | Similar to Auxin response factor 21                                                                                   |
| Os09g0565700 | UP   | -           | Protein of unknown function DUF599 family protein                                                                     |
| Os09g0566050 | UP   | -           | Conserved hypothetical protein                                                                                        |
| Os09g0568400 | UP   | OsUGlAcA E2 | NAD(P)-binding domain containing protein                                                                              |

|              |      |           |                                                                                                                          |
|--------------|------|-----------|--------------------------------------------------------------------------------------------------------------------------|
| Os10g0105900 | UP   | -         | Similar to POT family protein                                                                                            |
| Os10g0111400 | UP   | -         | Similar to Proteasome subunit beta type 1 (EC 3.4.25.1) (20S proteasome alpha subunit F) (20S proteasome subunit beta-6) |
| Os10g0112850 | DOWN | NPP1      | Nucleotide pyrophosphatase/phosphodiesterase, Negative effect on plant growth and starch accumulatio                     |
| Os10g0113100 | UP   | -         | Leucine-rich repeat, N-terminal domain containing protein                                                                |
| Os10g0116000 | DOWN | OsA-BCG45 | ABC-2 type transporter domain containing protein                                                                         |
| Os10g0124150 | DOWN | OsBAG2    | Similar to protein binding protein                                                                                       |
| Os10g0130500 | DOWN | -         | RabGAP/TBC domain containing protein                                                                                     |
| Os10g0131100 | DOWN | -         | Similar to Glutathione s-transferase (Fragment)                                                                          |
| Os10g0132800 | DOWN | -         | Protein of unknown function DUF241, plant family protein                                                                 |
| Os10g0135650 | DOWN | -         | Protein of unknown function DUF241, plant family protein                                                                 |
| Os10g0135833 | DOWN | -         | Glycolipid transfer protein domain domain containing protein                                                             |
| Os10g0137300 | DOWN | CP        | Similar to Cysteine proteinase (EC 3.4.22.-)                                                                             |
| Os10g0137700 | UP   | -         | Conserved hypothetical protein                                                                                           |
| Os10g0140700 | UP   | -         | Similar to predicted protein                                                                                             |
| Os10g0141200 | DOWN | OsGELP98  | Lipase, GDSL domain containing protein                                                                                   |
| Os10g0159300 | UP   | -         | Armado-like helical domain containing protein                                                                            |
| Os10g0162100 | UP   | OsFLA11   | FAS1 domain domain containing protein                                                                                    |
| Os10g0163300 | DOWN | -         | Myb/SANT-like domain domain containing protein                                                                           |
| Os10g0168900 | DOWN | OsCCR24   | Similar to Cinnamoyl CoA reductase                                                                                       |
| Os10g0180800 | DOWN | -         | Cytochrome P450 family protein                                                                                           |
| Os10g0188275 | DOWN | -         | Conserved hypothetical protein                                                                                           |
| Os10g0189100 | DOWN | -         | Heavy metal transport/detoxification protein domain containing protein                                                   |
| Os10g0190500 | UP   | -         | Disease resistance protein domain containing protein                                                                     |
| Os10g0198600 | DOWN | -         | Conserved hypothetical protein                                                                                           |
| Os10g0198900 | UP   | -         | Cytochrome P450 family protein                                                                                           |
| Os10g0206000 | DOWN | -         | Conserved hypothetical protein                                                                                           |
| Os10g0208500 | DOWN | -         | Similar to Plastid-specific 30S ribosomal protein 2, chloroplast precursor (PSRP- 2)                                     |
| Os10g0315400 | UP   | -         | Similar to H1005F08.16 protein                                                                                           |
| Os10g0320001 | UP   | OsPFPA4   | Similar to predicted protein                                                                                             |
| Os10g0322300 | DOWN | -         | Protein of unknown function DUF247, plant family protein                                                                 |
| Os10g0340800 | DOWN | -         | Targeting for Xklp2 family protein                                                                                       |
| Os10g0343951 | UP   | -         | Similar to cupin, RmlC-type                                                                                              |
| Os10g0344000 | UP   | BIP107    | Similar to Eukaryotic translation initiation factor 5 (eIF-5)                                                            |
| Os10g0348900 | DOWN | -         | Similar to Pi5-1                                                                                                         |
| Os10g0352000 | DOWN | -         | Non-protein coding transcript                                                                                            |
| Os10g0361000 | UP   | -         | Hypothetical conserved gene                                                                                              |
| Os10g0362700 | UP   | -         | UDP-glucuronosyl/UDP-glucosyltransferase family protein                                                                  |

|              |      |                |                                                                                   |
|--------------|------|----------------|-----------------------------------------------------------------------------------|
| Os10g0370500 | UP   | -              | UDP-glucuronosyl/UDP-glucosyltransferase family protein                           |
| Os10g0371100 | UP   | -              | Conserved hypothetical protein                                                    |
| Os10g0376900 | UP   | -              | F-box domain, cyclin-like domain containing protein                               |
| Os10g0389300 | UP   | -              | Ankyrin repeat containing protein                                                 |
| Os10g0393800 | UP   | -              | Protein of unknown function DUF81 family protein                                  |
| Os10g0394100 | DOWN | OsRLCK2<br>65  | Malectin-like carbohydrate-binding domain domain containing protein               |
| Os10g0395400 | DOWN | -              | Conserved hypothetical protein                                                    |
| Os10g0396666 | DOWN | OsRLCK2<br>66  | Similar to OsD305                                                                 |
| Os10g0404900 | DOWN | -              | Malectin-like carbohydrate-binding domain domain containing protein               |
| Os10g0412050 | DOWN | OsTPP7         | Similar to predicted protein                                                      |
| Os10g0418900 | UP   | -              | Conserved hypothetical protein                                                    |
| Os10g0421800 | DOWN | OsPUB18        | Armadillo-like helical domain containing protein                                  |
| Os10g0437600 | DOWN | -              | Conserved hypothetical protein                                                    |
| Os10g0442100 | DOWN | -              | Endonuclease/exonuclease/phosphatase domain containing protein                    |
| Os10g0442400 | DOWN | OsVIT2         | Protein of unknown function DUF125, transmembrane family protein                  |
| Os10g0442800 | UP   | -              | Serine/threonine protein kinase domain containing protein                         |
| Os10g0456000 | DOWN | -              | Similar to membrane alanyl aminopeptidase                                         |
| Os10g0460900 | DOWN | -              | Zinc finger, RING-type domain containing protein                                  |
| Os10g0462800 | DOWN | -              | Conserved hypothetical protein                                                    |
| Os10g0465700 | DOWN | OsPPR1         | Pentatricopeptide repeat domain containing protein                                |
| Os10g0467900 | DOWN | -              | Protein of unknown function DUF248, methyltransferase putative family protein     |
| Os10g0479500 | DOWN | WRKY76         | WRKY transcription factor, Transcriptional repressor, Pathogen defense            |
| Os10g0482000 | DOWN | OsCIPK16       | Similar to CBL-interacting protein kinase 16                                      |
| Os10g0482066 | DOWN | -              | Zinc finger, U1-type domain containing protein                                    |
| Os10g0486100 | DOWN | BC6            | Cellulose synthase A catalytic subunit 9, Cell wall biosynthesis and plant growth |
| Os10g0489500 | DOWN | -              | Conserved hypothetical protein                                                    |
| Os10g0491450 | DOWN | OsSAP          | Similar to senescence-associated protein DH                                       |
| Os10g0493600 | DOWN | -              | Similar to cDNA, clone: J075189B12, full insert sequence                          |
| Os10g0493850 | DOWN | OsCB-<br>SPPR1 | Cystathionine beta-synthase, core domain containing protein                       |
| Os10g0496900 | DOWN | -              | Hypothetical conserved gene                                                       |
| Os10g0497300 | DOWN | -              | Zinc finger, C2H2-type domain containing protein                                  |
| Os10g0498100 | UP   | -              | Similar to AAA-type ATPase family protein                                         |
| Os10g0498300 | DOWN | -              | Similar to Senescence-associated protein SAG102                                   |
| Os10g0503100 | DOWN | Oshox11        | Homeodomain-related domain containing protein                                     |
| Os10g0506100 | UP   | -              | Conserved hypothetical protein                                                    |
| Os10g0506800 | DOWN | ACO1           | ACC oxidase, Ethylene biosynthesis                                                |

|              |      |           |                                                                                                          |
|--------------|------|-----------|----------------------------------------------------------------------------------------------------------|
| Os10g0509000 | DOWN | PDIL2     | Similar to protein disulfide isomerase                                                                   |
| Os10g0511800 | DOWN | -         | Conserved hypothetical protein                                                                           |
| Os10g0512400 | UP   | -         | Similar to ARP protein                                                                                   |
| Os10g0512500 | DOWN | -         | Alpha/beta hydrolase fold-3 domain containing protein                                                    |
| Os10g0520400 | UP   | -         | Domain of unknown function DUF547 domain containing protein                                              |
| Os10g0521000 | UP   | OsUCL31   | Cupredoxin domain containing protein                                                                     |
| Os10g0521500 | UP   | -         | Non-protein coding transcript                                                                            |
| Os10g0521900 | DOWN | -         | Hypothetical protein                                                                                     |
| Os10g0522700 | UP   | -         | NusB/RsmB/TIM44 domain containing protein                                                                |
| Os10g0524300 | UP   | OsSub58   | Similar to Subtilisin-like protease                                                                      |
| Os10g0524700 | UP   | -         | EF hand domain containing protein                                                                        |
| Os10g0525800 | DOWN | -         | Hypothetical protein                                                                                     |
| Os10g0528200 | UP   | -         | Conserved hypothetical protein                                                                           |
| Os10g0528300 | UP   | SAP1      | A20/AN1 zinc-finger protein, Response to multiple biotic stresses, Regulation of abiotic stress response |
| Os10g0528400 | UP   | Os9bglu30 | Similar to Beta-primeverosidase (EC 3.2.1.149)                                                           |
| Os10g0532100 | DOWN | OsPILS1   | Auxin efflux carrier domain containing protein                                                           |
| Os10g0532300 | UP   | OsHsp58.7 | Similar to Heat shock protein 70 (Hsc70-5)                                                               |
| Os10g0534801 | UP   | -         | Adenine nucleotide translocator 1 domain containing protein                                              |
| Os10g0536000 | UP   | rpL32_9.1 | Similar to Ribosomal L32                                                                                 |
| Os10g0538200 | DOWN | -         | Similar to Br FatA1                                                                                      |
| Os10g0544600 | UP   | -         | Similar to cDNA clone:001-044-E12, full insert sequence                                                  |
| Os10g0546600 | DOWN | -         | Similar to Pyruvate dehydrogenase E1 beta subunit isoform 3 (EC 1.2.4.1)                                 |
| Os10g0548000 | DOWN | -         | NB-ARC domain containing protein                                                                         |
| Os10g0548700 | DOWN | OsSGT     | UDP-glucuronosyl/UDP-glucosyltransferase family protein                                                  |
| Os10g0549500 | DOWN | -         | Similar to predicted protein                                                                             |
| Os10g0550100 | DOWN | -         | Glycoside hydrolase, family 29 (alpha-L-fucosidase) protein                                              |
| Os10g0553800 | UP   | OsDREB1A  | DRE-binding protein 1A                                                                                   |
| Os10g0556100 | DOWN | -         | Hypothetical conserved gene                                                                              |
| Os10g0558200 | UP   | Roc6(t)   | Similar to Homeobox protein GLABRA2 (Homeobox-leucine zipper protein ATHB-10) (HD-ZIP protein ATHB-10)   |
| Os10g0559700 | DOWN | -         | Hypothetical conserved gene                                                                              |
| Os10g0560700 | UP   | -         | Hypothetical conserved gene                                                                              |
| Os10g0561300 | DOWN | -         | Similar to Acyl carrier protein III, chloroplast precursor (ACP III)                                     |
| Os10g0569500 | UP   | -         | Sedlin domain containing protein                                                                         |
| Os10g0569600 | UP   | LOGL9     | Lysine decarboxylase-like protein, Response to abiotic stress                                            |
| Os10g0571300 | UP   | -         | Hypothetical conserved gene                                                                              |
| Os10g0572500 | DOWN | -         | Zinc finger, RING/FYVE/PHD-type domain containing protein                                                |
| Os10g0573800 | UP   | OsPILS7b  | Similar to auxin Efflux Carrier family protein                                                           |

|              |      |            |                                                                                   |
|--------------|------|------------|-----------------------------------------------------------------------------------|
| Os10g0574750 | DOWN | -          | Sulfotransferase family protein                                                   |
| Os10g0578950 | DOWN | -          | Similar to AMP-binding protein (Adenosine monophosphate binding protein 6 AMPBP6) |
| Os11g0102200 | DOWN | -          | Signal peptidase 22 kDa subunit family protein                                    |
| Os11g0103000 | DOWN | -          | CysteinyI-tRNA synthetase, class Ia family protein                                |
| Os11g0104400 | UP   | -          | Zinc finger, DHHC-type, palmitoyltransferase domain containing protein            |
| Os11g0104800 | UP   | -          | ATPase, AAA-type, core domain containing protein                                  |
| Os11g0105750 | DOWN | -          | Peptidase C1A, papain family protein                                              |
| Os11g0106200 | DOWN | -          | Conserved hypothetical protein                                                    |
| Os11g0113700 | UP   | EIP3       | Prephenate dehydratase domain containing protein                                  |
| Os11g0116300 | UP   | -          | Similar to Prephenate dehydratase                                                 |
| Os11g0118500 | DOWN | Ub-CEP52-2 | Similar to 60S ribosomal protein L40 (CEP52)                                      |
| Os11g0124500 | UP   | OsERF      | -                                                                                 |
| Os11g0128300 | UP   | -          | Hypothetical conserved gene                                                       |
| Os11g0131700 | UP   | OsWAK95    | Similar to Protein kinase domain containing protein, expressed                    |
| Os11g0138400 | UP   | -          | Non-protein coding transcript                                                     |
| Os11g0140700 | DOWN | -          | Aldo/keto reductase family protein                                                |
| Os11g0144900 | DOWN | -          | Pentatricopeptide repeat domain containing protein                                |
| Os11g0146300 | UP   | -          | Non-protein coding transcript                                                     |
| Os11g0147150 | UP   | -          | Hypothetical protein                                                              |
| Os11g0153000 | UP   | -          | Similar to NB-ARC domain containing protein                                       |
| Os11g0153600 | DOWN | -          | Hypothetical protein                                                              |
| Os11g0153700 | DOWN | -          | Hypothetical conserved gene                                                       |
| Os11g0153800 | UP   | -          | Conserved hypothetical protein                                                    |
| Os11g0154500 | DOWN | -          | Similar to BLN1-1                                                                 |
| Os11g0155500 | UP   | -          | Cyclin-like F-box domain containing protein                                       |
| Os11g0156300 | DOWN | -          | Hypothetical conserved gene                                                       |
| Os11g0157000 | UP   | OsRLCK290  | Similar to Protein kinase domain containing protein                               |
| Os11g0160400 | UP   | -          | Conserved hypothetical protein                                                    |
| Os11g0161700 | UP   | -          | Hypothetical conserved gene                                                       |
| Os11g0162200 | UP   | -          | Hypothetical protein                                                              |
| Os11g0167500 | DOWN | -          | Conserved hypothetical protein                                                    |
| Os11g0179000 | UP   | OsUGT98B3  | UDP-glucuronosyl/UDP-glucosyltransferase family protein                           |
| Os11g0180900 | UP   | WAK112     | Wall-associated kinase, Negative regulation of rice blast resistanc               |
| Os11g0195600 | UP   | -          | Hypothetical protein                                                              |
| Os11g0199200 | UP   | OspPGM     | Plastidic phosphoglucomutase, Starch synthesis in rice polle                      |
| Os11g0201299 | DOWN | -          | Protein of unknown function DUF594 family protein                                 |
| Os11g0202600 | UP   | -          | Intron-encoded nuclease 2 domain containing protein                               |

|              |      |           |                                                                                                                        |
|--------------|------|-----------|------------------------------------------------------------------------------------------------------------------------|
| Os11g0204600 | DOWN | OsEnS-134 | Drug/metabolite transporter domain containing protein                                                                  |
| Os11g0204800 | DOWN | -         | Non-protein coding transcript                                                                                          |
| Os11g0206850 | DOWN | -         | Hypothetical protein                                                                                                   |
| Os11g0210300 | UP   | SIP28     | Similar to SKIP interacting protein 28 (Fragment)                                                                      |
| Os11g0210500 | UP   | -         | Hypothetical gene                                                                                                      |
| Os11g0211700 | UP   | -         | Conserved hypothetical protein                                                                                         |
| Os11g0212900 | UP   | -         | Conserved hypothetical protein                                                                                         |
| Os11g0214400 | UP   | -         | Hypothetical conserved gene                                                                                            |
| Os11g0215100 | UP   | -         | Similar to transparent testa 12 protein                                                                                |
| Os11g0216100 | DOWN | -         | Hypothetical protein                                                                                                   |
| Os11g0220300 | DOWN | -         | Conserved hypothetical protein                                                                                         |
| Os11g0227600 | DOWN | -         | Lipoxygenase, LH2 domain containing protein                                                                            |
| Os11g0227800 | DOWN | -         | Conserved hypothetical protein                                                                                         |
| Os11g0228201 | UP   | -         | Conserved hypothetical protein                                                                                         |
| Os11g0229100 | DOWN | -         | Glycoside hydrolase, catalytic core domain containing protein                                                          |
| Os11g0229300 | DOWN | OsERF     | -                                                                                                                      |
| Os11g0229333 | DOWN | OsbHLH045 | Helix-loop-helix DNA-binding domain containing protein                                                                 |
| Os11g0229400 | DOWN | OsRCCR2   | Similar to Red chlorophyll catabolite reductase (Fragment)                                                             |
| Os11g0236932 | UP   | OsGELP105 | Lipase, GDSL domain containing protein                                                                                 |
| Os11g0242200 | DOWN | -         | Metallophosphoesterase domain containing protein                                                                       |
| Os11g0245200 | DOWN | OsGSTU34  | Thioredoxin fold domain containing protein                                                                             |
| Os11g0270201 | UP   | OsFbox552 | Hypothetical conserved gene                                                                                            |
| Os11g0274700 | DOWN | Oshox23   | Similar to HAHB-5 (Fragment)                                                                                           |
| Os11g0286800 | DOWN | -         | Similar to aminophospholipid ATPase                                                                                    |
| Os11g0292050 | DOWN | -         | Hypothetical conserved gene                                                                                            |
| Os11g0303600 | UP   | SIP2      | Similar to SIPL                                                                                                        |
| Os11g0305300 | DOWN | -         | Pentatricopeptide repeat domain containing protein                                                                     |
| Os11g0308800 | DOWN | OsSSIIc   | Similar to Starch synthase II, chloroplast precursor (EC 2.4.1.21) (SS II) (GBSSII) (Granule-bound starch synthase II) |
| Os11g0425300 | DOWN | -         | Similar to Phosphoglycerate kinase                                                                                     |
| Os11g0438700 | DOWN | -         | Similar to UDP-glucuronosyl and UDP-glucosyl transferase family protein, expressed                                     |
| Os11g0439600 | UP   | OsRLCK301 | Protein serine/threonine kinase (Protein kinase)                                                                       |
| Os11g0441500 | UP   | GRP       | Similar to Glycine-rich cell wall structural protein 2 precursor                                                       |
| Os11g0455500 | UP   | -         | Hypothetical protein                                                                                                   |
| Os11g0463700 | DOWN | -         | Similar to cDNA clone:J013158D14, full insert sequence                                                                 |

|              |      |               |                                                                                                                                                |
|--------------|------|---------------|------------------------------------------------------------------------------------------------------------------------------------------------|
| Os11g0475500 | UP   | WSL3          | Component of the plastid-encoded plastid RNA polymerase (PEP), peripheral subunit of PEP complex, OsPAP1/OspTAC3, Early chloroplast developmen |
| Os11g0481150 | DOWN | OsSTA246      | Similar to Beta-amylase PCT-BMYI (EC 3.2.1.2)                                                                                                  |
| Os11g0482400 | DOWN | -             | Protein kinase, catalytic domain domain containing protein                                                                                     |
| Os11g0484500 | UP   | LOGL10        | Similar to carboxy-lyase                                                                                                                       |
| Os11g0484700 | UP   | -             | Conserved hypothetical protein                                                                                                                 |
| Os11g0488400 | UP   | -             | Hypothetical genes                                                                                                                             |
| Os11g0488900 | UP   | -             | Cytochrome P450-like protein (CYP86B1)                                                                                                         |
| Os11g0489250 | UP   | -             | Similar to terpene synthase 2                                                                                                                  |
| Os11g0490300 | UP   | -             | Conserved hypothetical protein                                                                                                                 |
| Os11g0490600 | DOWN | alphaGa1      | Alpha-galactosidase precursor (EC 3.2.1.22) (Melibiase) (Alpha-D- galactoside galactohydrolase)                                                |
| Os11g0498600 | UP   | -             | Hypothetical protein                                                                                                                           |
| Os11g0503900 | UP   | FGL           | Similar to Protochlorophyllide reductase B, chloroplastic                                                                                      |
| Os11g0514500 | UP   | PPR794        | Pentatricopeptide repeat domain containing protein                                                                                             |
| Os11g0515700 | DOWN | -             | Alpha/beta hydrolase fold-1 domain containing protein                                                                                          |
| Os11g0520500 | DOWN | -             | Similar to Epoxide hydrolase                                                                                                                   |
| Os11g0531800 | DOWN | OsPLIM2c      | Similar to Transcription factor L2                                                                                                             |
| Os11g0533100 | DOWN | -             | Similar to 10-deacetylbaecatin III 10-O-acetyltransferase                                                                                      |
| Os11g0539700 | DOWN | -             | Heavy metal transport/detoxification protein domain containing protein                                                                         |
| Os11g0540100 | DOWN | OsSET39       | SET domain containing protein                                                                                                                  |
| Os11g0544000 | DOWN | -             | Similar to MutS domain V family protein, expressed                                                                                             |
| Os11g0544800 | DOWN | -             | Similar to Plus-3 domain containing protein, expressed                                                                                         |
| Os11g0549650 | UP   | CYP84A5       | Coniferaldehyde 5-hydroxylase, Lignin biosynthesi                                                                                              |
| Os11g0549665 | UP   | -             | RNA-binding, CRM domain domain containing protein                                                                                              |
| Os11g0549667 | UP   | Os_F0771      | Protein of unknown function DUF295 family protein                                                                                              |
| Os11g0550800 | DOWN | OsTRE         | Similar to TRE1 protein (Fragment)                                                                                                             |
| Os11g0552500 | UP   | -             | Esterase/lipase/thioesterase domain containing protein                                                                                         |
| Os11g0555300 | DOWN | OsRhmbd<br>17 | Similar to Membrane protein                                                                                                                    |
| Os11g0556400 | DOWN | -             | Conserved hypothetical protein                                                                                                                 |
| Os11g0558900 | DOWN | OsEMSA1       | LysM domain-containing protein, Embryo sac developmen                                                                                          |
| Os11g0562600 | DOWN | -             | Cytochrome P450 family protein                                                                                                                 |
| Os11g0565920 | DOWN | OsGSTU3<br>1  | Similar to Glutathione S-transferase GSTU31 (Fragment)                                                                                         |
| Os11g0568300 | DOWN | OsGSTU1<br>2  | Similar to Tau class GST protein 3                                                                                                             |
| Os11g0569500 | DOWN | GST           | Similar to Glutathione S-transferase TSI-1 (EC 2.5.1.18) (Glutathione S- trans-ferase 1)                                                       |
| Os11g0569800 | UP   | OsGSTU4       | Tau class GST protein 4                                                                                                                        |
| Os11g0570000 | UP   | OsGSTU3       | Glutathione S-transferase, C-terminal-like domain containing protein                                                                           |

|              |      |                |                                                                                                                                                       |
|--------------|------|----------------|-------------------------------------------------------------------------------------------------------------------------------------------------------|
| Os11g0572200 | DOWN | OsHDMA<br>704  | Similar to Amine oxidase, flavin-containing                                                                                                           |
| Os11g0574333 | UP   | -              | Heavy metal transport/detoxification protein domain containing protein                                                                                |
| Os11g0576900 | UP   | -              | Hypothetical gene                                                                                                                                     |
| Os11g0578700 | DOWN | OsSce1         | Similar to SUMO E2 conjugating enzyme SCE1                                                                                                            |
| Os11g0582000 | UP   | -              | Peptidase aspartic, catalytic domain containing protein                                                                                               |
| Os11g0586001 | DOWN | CDPK           | Similar to Calcium-dependent protein kinase 3                                                                                                         |
| Os11g0586300 | DOWN | -              | Zinc finger, RING/FYVE/PHD-type domain containing protein                                                                                             |
| Os11g0588300 | UP   | CYP97C2        | Similar to Chloroplast carotenoid epsilon-ring hydroxylase                                                                                            |
| Os11g0591800 | UP   | -              | Hypothetical conserved gene                                                                                                                           |
| Os11g0592000 | UP   | RLCK306        | Receptor-like cytoplasmic kinase, Various stress responses, Regulation of resistance to bacterial leaf streak (BLS                                    |
| Os11g0592200 | UP   | -              | Similar to Branched-chain-amino-acid aminotransferase                                                                                                 |
| Os11g0593700 | UP   | Os-<br>MED12_2 | Conserved hypothetical protein                                                                                                                        |
| Os11g0596250 | UP   | -              | Flavin-containing monooxygenase FMO family protein                                                                                                    |
| Os11g0597700 | UP   | -              | Protein of unknown function DUF566 family protein                                                                                                     |
| Os11g0598000 | DOWN | OsGGT          | Similar to DNA chromosome 4, ESSA I CONTIG fragment NO. 6 (Glucosyl-transferase like protein)                                                         |
| Os11g0598800 | DOWN | OsEXPB4        | Similar to beta-expansin EXPB4                                                                                                                        |
| Os11g0602500 | UP   | -              | 2OG-Fe(II) oxygenase domain containing protein                                                                                                        |
| Os11g0602600 | UP   | -              | Similar to Agenet domain containing protein, expressed                                                                                                |
| Os11g0605100 | DOWN | OsERF          | -                                                                                                                                                     |
| Os11g0606400 | DOWN | -              | Similar to Monosaccharid transporter                                                                                                                  |
| Os11g0615900 | DOWN | OsRALF-<br>29  | Conserved hypothetical protein                                                                                                                        |
| Os11g0625801 | DOWN | -              | Similar to RIR1b protein precursor                                                                                                                    |
| Os11g0626700 | DOWN | OsRLCK3<br>08  | Similar to Protein kinase-like protein                                                                                                                |
| Os11g0634200 | UP   | -              | Zinc finger, RING/FYVE/PHD-type domain containing protein                                                                                             |
| Os11g0635300 | UP   | -              | Mitochondrial carnitine/acylcarnitine carrier-like protein (A BOUT DE SOUF-FLE) (Carnitine/acylcarnitine translocase-like protein) (CAC-like protein) |
| Os11g0635500 | UP   | -              | Hypothetical gene                                                                                                                                     |
| Os11g0638000 | DOWN | OsACS2         | Similar to 4-coumarate--CoA ligase-like 2                                                                                                             |
| Os11g0639300 | UP   | -              | Similar to NPH1-1                                                                                                                                     |
| Os11g0655000 | DOWN | -              | Pentatricopeptide repeat domain containing protein                                                                                                    |
| Os11g0659700 | UP   | OsFAD3         | Similar to W-3 fatty acid desaturase                                                                                                                  |
| Os11g0661101 | UP   | OsTBL10        | Hypothetical conserved gene                                                                                                                           |
| Os11g0664400 | DOWN | -              | Quinonprotein alcohol dehydrogenase-like domain containing protein                                                                                    |
| Os11g0664500 | UP   | -              | Similar to cDNA clone:J013071M22, full insert sequence                                                                                                |
| Os11g0664800 | DOWN | -              | BTB domain containing protein                                                                                                                         |

|              |      |            |                                                                                                                            |
|--------------|------|------------|----------------------------------------------------------------------------------------------------------------------------|
| Os11g0667700 | DOWN | CIPK15     | Serine/threonine protein kinase, Abiotic stress                                                                            |
| Os11g0668300 | DOWN | CHI        | Chalcone isomerase domain containing protein                                                                               |
| Os11g0668650 | DOWN | -          | Hypothetical protein                                                                                                       |
| Os11g0669100 | DOWN | -          | Similar to protein binding / signal transducer                                                                             |
| Os11g0670700 | DOWN | -          | Protein of unknown function DUF607 family protein                                                                          |
| Os11g0670800 | DOWN | -          | Similar to GDA1/CD39 family protein, expressed                                                                             |
| Os11g0670900 | UP   | -          | Similar to ZF-HD homeobox protein (Fragment)                                                                               |
| Os11g0672400 | DOWN | -          | Zinc finger, Tim10/DDP-type domain containing protein                                                                      |
| Os11g0672600 | DOWN | -          | Similar to Phosphoglycerate mutase family protein, expressed                                                               |
| Os11g0672700 | DOWN | -          | Similar to Saccharopine dehydrogenase family protein, expressed                                                            |
| Os11g0678200 | DOWN | -          | Conserved hypothetical protein                                                                                             |
| Os11g0681400 | DOWN | OsUGT75 E1 | UDP-glucuronosyl/UDP-glucosyltransferase family protein                                                                    |
| Os11g0683500 | DOWN | -          | Conserved hypothetical protein                                                                                             |
| Os11g0683600 | DOWN | -          | Hypothetical gene                                                                                                          |
| Os11g0686100 | UP   | Os-CYP94C2 | Cytochrome P450 family protein                                                                                             |
| Os11g0689800 | UP   | -          | Conserved hypothetical protein                                                                                             |
| Os11g0691400 | DOWN | -          | Protein of unknown function DUF3049 domain containing protein                                                              |
| Os11g0691500 | DOWN | YGL138(t)  | Signal recognition particle 54 kDa (SRP54) protein, Chloroplast development                                                |
| Os11g0691650 | UP   | -          | Similar to Signal recognition particle 54 kDa protein, chloroplast precursor (SRP54) (54 chloroplast protein) (54CP) (FFC) |
| Os11g0693800 | UP   | RPS25      | Similar to Ribosomal protein S25 (40S ribosomal 25S subunit)                                                               |
| Os11g0695800 | DOWN | NAC17      | Blast disease-responsive transcription factor, Disease resistance                                                          |
| Os11g0702100 | UP   | OsCAT8     | Similar to Amino acid permease family protein, expressed                                                                   |
| Os11g0704500 | UP   | OsOFP18    | Protein of unknown function DUF623, plant domain containing protein                                                        |
| Os11g0706100 | DOWN | -          | Putative 5-3 exonuclease domain containing protein                                                                         |
| Os12g0101800 | DOWN | -          | Conserved hypothetical protein                                                                                             |
| Os12g0104400 | UP   | -          | Conserved hypothetical protein                                                                                             |
| Os12g0113001 | UP   | -          | Similar to Ubiquinol-cytochrome c reductase complex 7.8 kDa protein (EC 1.10.2.2) (Mitochondrial hinge protein) (CR7)      |
| Os12g0114000 | DOWN | OsSTA250   | Similar to Serine esterase family protein, expressed                                                                       |
| Os12g0115801 | UP   | -          | Plant disease resistance response protein family protein                                                                   |
| Os12g0117600 | DOWN | -          | Myb transcription factor domain containing protein                                                                         |
| Os12g0117700 | DOWN | OsAAP11 C  | Similar to Amino acid carrier (Fragment)                                                                                   |
| Os12g0124500 | UP   | ESP2       | Protein disulfide isomerase-like enzyme, Starch synthesis, Maturation of proglutelin in endosperm                          |
| Os12g0125500 | UP   | Os_F0390   | Similar to F-box domain containing protein                                                                                 |
| Os12g0128600 | UP   | -          | Similar to OSIGBa0126J24.2 protein                                                                                         |
| Os12g0130100 | DOWN | -          | Similar to Glucose-1-phosphate adenylyltransferase                                                                         |

|              |      |            |                                                                                |
|--------------|------|------------|--------------------------------------------------------------------------------|
| Os12g0130200 | DOWN | -          | Similar to Wali7 protein (Fragment)                                            |
| Os12g0136900 | DOWN | -          | Conserved hypothetical protein                                                 |
| Os12g0138050 | DOWN | ADH1       | Alcohol dehydrogenase 1                                                        |
| Os12g0141000 | DOWN | Adh2*      | Similar to Alcohol dehydrogenase                                               |
| Os12g0147800 | UP   | -          | Hypothetical conserved gene                                                    |
| Os12g0148700 | DOWN | OsWD40-187 | Serine/threonine protein kinase-related domain containing protein              |
| Os12g0153200 | UP   | OsWD40-188 | Similar to Protein kinase domain containing protein, expressed                 |
| Os12g0156100 | DOWN | -          | Plant disease resistance response protein family protein                       |
| Os12g0156866 | UP   | -          | Plant disease resistance response protein family protein                       |
| Os12g0159600 | UP   | -          | Similar to Heat shock protein binding protein                                  |
| Os12g0163500 | UP   | -          | Similar to NB-ARC domain containing protein, expressed                         |
| Os12g0168100 | UP   | -          | Hypothetical protein                                                           |
| Os12g0169600 | DOWN | -          | NB-ARC domain containing protein                                               |
| Os12g0170800 | DOWN | -          | Hypothetical gene                                                              |
| Os12g0171500 | DOWN | -          | Similar to B0616E02-H0507E05.11 protein                                        |
| Os12g0171801 | DOWN | -          | Similar to NBS-LRR-like protein                                                |
| Os12g0171900 | DOWN | -          | Hypothetical gene                                                              |
| Os12g0175400 | UP   | -          | Similar to NBS-LRR protein (Fragment)                                          |
| Os12g0178700 | DOWN | -          | Hypothetical conserved gene                                                    |
| Os12g0183300 | UP   | OsPP2C74   | Protein phosphatase 2C-like domain containing protein                          |
| Os12g0188566 | DOWN | -          | Similar to leucine-rich repeat family protein / protein kinase family protein  |
| Os12g0189300 | UP   | -          | Conserved hypothetical protein                                                 |
| Os12g0209000 | DOWN | OsRLCK322  | Hypothetical conserved gene                                                    |
| Os12g0209200 | UP   | -          | Homeodomain-like containing protein                                            |
| Os12g0211600 | UP   | OsOSC10    | Squalene cyclase domain containing protein                                     |
| Os12g0215950 | DOWN | -          | Similar to PHD-finger family protein, expressed                                |
| Os12g0216500 | UP   | OMT        | Similar to Herbicide safener binding protein                                   |
| Os12g0218100 | UP   | -          | Hypothetical gene                                                              |
| Os12g0218500 | UP   | -          | Hypothetical conserved gene                                                    |
| Os12g0219700 | UP   | -          | Similar to predicted protein                                                   |
| Os12g0221600 | UP   | -          | Similar to alkaline alpha galactosidase 3                                      |
| Os12g0228800 | DOWN | -          | Similar to Tropinone reductase-I (EC 1.1.1.206) (TR-I) (Tropine dehydrogenase) |
| Os12g0229100 | UP   | -          | Similar to Nod factor binding lectin-nucleotide phosphohydrolase               |
| Os12g0230133 | UP   | -          | UDP-glucuronosyl/UDP-glucosyltransferase family protein                        |
| Os12g0233300 | DOWN | -          | Similar to Adenosylhomocysteinase                                              |
| Os12g0239900 | UP   | -          | Penicillin-binding protein, transpeptidase fold domain containing protein      |
| Os12g0240900 | UP   | -          | Conserved hypothetical protein                                                 |

|              |      |               |                                                                                            |
|--------------|------|---------------|--------------------------------------------------------------------------------------------|
| Os12g0242100 | UP   | -             | NB-ARC domain containing protein                                                           |
| Os12g0247700 | UP   | -             | Pentatricopeptide repeat domain containing protein                                         |
| Os12g0254825 | UP   | Os6PGDH<br>2  | Similar to 6-phosphogluconate dehydrogenase                                                |
| Os12g0257600 | UP   | OsLTPd12      | Bifunctional inhibitor/plant lipid transfer protein/seed storage domain containing protein |
| Os12g0260500 | UP   | -             | Conserved hypothetical protein                                                             |
| Os12g0263000 | UP   | OsFbox60<br>0 | Similar to MYND finger family protein, expressed                                           |
| Os12g0263050 | UP   | -             | Similar to Cytochrome P450 family protein, expressed                                       |
| Os12g0263600 | DOWN | -             | Hypothetical conserved gene                                                                |
| Os12g0267800 | DOWN | LA1           | Regulation of shoot gravitropism and tiller angle, Regulation of polar auxin transpor      |
| Os12g0267900 | DOWN | -             | Similar to HVA22 protein                                                                   |
| Os12g0281966 | DOWN | -             | Sulfotransferase family protein                                                            |
| Os12g0289600 | DOWN | -             | Sorghum bicolor leucine-rich repeat-containing extracellular glycoprotein precursor        |
| Os12g0289800 | DOWN | -             | Non-protein coding transcript                                                              |
| Os12g0291000 | DOWN | -             | Conserved hypothetical protein                                                             |
| Os12g0292900 | DOWN | -             | Hypothetical protein                                                                       |
| Os12g0417300 | DOWN | -             | Similar to CarD-like transcriptional regulator family protein, expressed                   |
| Os12g0420300 | UP   | OsFbox60<br>8 | F-box domain, cyclin-like domain containing protein                                        |
| Os12g0428000 | UP   | -             | Similar to Xaa-Pro aminopeptidase 2 (EC 3.4.11.9)                                          |
| Os12g0428200 | UP   | -             | Hypothetical conserved gene                                                                |
| Os12g0433200 | DOWN | GATB          | Glutamyl-tRNA(Gln) amidotransferase subunit B, Primary root developmen                     |
| Os12g0433700 | UP   | -             | Mitochondrial matrix Mmp37 domain containing protein                                       |
| Os12g0439201 | UP   | -             | Hypothetical conserved gene                                                                |
| Os12g0441300 | DOWN | -             | Non-protein coding transcript                                                              |
| Os12g0441700 | UP   | -             | Similar to plastid-specific ribosomal protein 6                                            |
| Os12g0442800 | UP   | -             | Conserved hypothetical protein                                                             |
| Os12g0458100 | UP   | -             | Similar to Rp1-like protein                                                                |
| Os12g0459300 | DOWN | OsRLCK3<br>34 | Serine/threonine protein kinase-related domain containing protein                          |
| Os12g0467300 | DOWN | -             | Leucine-rich repeat, N-terminal domain containing protein                                  |
| Os12g0468300 | DOWN | -             | Similar to Leucine Rich Repeat family protein                                              |
| Os12g0470000 | DOWN | -             | Conserved hypothetical protein                                                             |
| Os12g0477400 | UP   | -             | Leucine-rich repeat domain containing protein                                              |
| Os12g0480100 | DOWN | -             | Cell division cycle-associated protein domain containing protein                           |
| Os12g0491800 | UP   | -             | Similar to Receptor kinase-like protein                                                    |
| Os12g0507500 | DOWN | -             | Protein kinase, catalytic domain domain containing protein                                 |

|              |      |                |                                                                         |
|--------------|------|----------------|-------------------------------------------------------------------------|
| Os12g0517800 | DOWN | -              | Similar to Receptor kinase-like protein                                 |
| Os12g0520200 | UP   | OsEXO70<br>FX8 | Exo70 exocyst complex subunit family protein                            |
| Os12g0538600 | UP   | -              | Non-protein coding transcript                                           |
| Os12g0538700 | UP   | -              | Similar to HAT family dimerisation domain containing protein, expressed |
| Os12g0539700 | DOWN | -              | Similar to F-box domain containing protein, expressed                   |
| Os12g0539751 | DOWN | -              | Hypothetical conserved gene                                             |
| Os12g0541500 | DOWN | -              | Putative protein phosphatase 2C 76                                      |
| Os12g0547600 | DOWN | -              | Conserved hypothetical protein                                          |
| Os12g0548401 | UP   | OsGSTT1        | Similar to Glutathione transferase AtGST 10 (EC 2.5.1.18)               |
| Os12g0548501 | UP   | OsPR4d         | Barwin domain containing protein                                        |
| Os12g0548700 | UP   | OsPR4c         | Similar to Barwin                                                       |
| Os12g0549700 | DOWN | OsPR4          | Similar to Chitin-binding allergen Bra r 2 (Fragments)                  |
| Os12g0559100 | DOWN | OsFbox62<br>0  | Cyclin-like F-box domain containing protein                             |
| Os12g0561000 | UP   | -              | Conserved hypothetical protein                                          |
| Os12g0564400 | DOWN | -              | Similar to Resistant protein                                            |
| Os12g0567800 | UP   | OsFbox62<br>4  | Similar to F-box domain containing protein, expressed                   |
| Os12g0569300 | UP   | -              | NB-ARC domain containing protein                                        |
| Os12g0569500 | UP   | -              | Tetratricopeptide-like helical domain containing protein                |
| Os12g0570700 | UP   | -              | Similar to 40S ribosomal protein S9                                     |
| Os12g0576300 | DOWN | -              | Similar to 40S ribosomal protein S9                                     |
| Os12g0581900 | UP   | -              | Similar to NB-ARC domain containing protein                             |
| Os12g0583300 | DOWN | -              | NB-ARC domain containing protein                                        |
| Os12g0586300 | UP   | -              | Similar to NB-ARC domain containing protein, expressed                  |
| Os12g0598000 | UP   | -              | Conserved hypothetical protein                                          |
| Os12g0599625 | DOWN | -              | Non-protein coding transcript                                           |
| Os12g0600400 | UP   | -              | Hypothetical conserved gene                                             |
| Os12g0608633 | DOWN | -              | Conserved hypothetical protein                                          |
| Os12g0611100 | DOWN | -              | Similar to Cytochrome P450 family protein                               |
| Os12g0611900 | UP   | -              | Cytochrome P450 family protein                                          |
| Os12g0623900 | UP   | -              | Similar to GTP-binding protein engA                                     |
| Os12g0628100 | UP   | -              | Protein of unknown function DUF594 family protein                       |
| Os12g0628600 | UP   | OsLAC23        | Cupredoxin domain containing protein                                    |
| Os12g0629700 | UP   | Os-TBT2        | Transferase family protein                                              |
| Os12g0630100 | UP   | -              | Conserved hypothetical protein                                          |
| Os12g0632401 | UP   | -              | Similar to Pectinesterase family protein                                |
| Os12g0634500 | UP   | -              | Conserved hypothetical protein                                          |
| Os12g0634600 | UP   | -              | Hypothetical conserved gene                                             |
| Os12g0635700 | UP   | -              | Hypothetical conserved gene                                             |

---

|              |    |               |                                                                |
|--------------|----|---------------|----------------------------------------------------------------|
| Os12g0637400 | UP | -             | Hypothetical conserved gene                                    |
| Os12g0638300 | UP | OsRLCK3<br>48 | Similar to Protein kinase domain containing protein, expressed |
